# Supplementary material for: Towards general network architecture design criteria for negative gas adsorption transitions in ultraporous frameworks
Source: PubMed Central journal article supplement (PMC6690989; doi:10.1038/s41467-019-11565-3), 2019-08-12
Supplement: 41467_2019_11565_MOESM1_ESM.pdf [file 41467_2019_11565_MOESM1_ESM.pdf]

**Supplementary Information for**

**Towards general network architecture design criteria for negative gas  
adsorption transitions in ultraporous frameworks**

Simon Krause<sup>1</sup>, Jack D. Evans<sup>1,2</sup>, Volodymyr Bon<sup>1</sup>, Irena Senkowska<sup>1</sup>, Paul Iacomi<sup>3</sup>, Felicitas Kolbe<sup>1</sup>, Sebastian Ehrling<sup>1</sup>, Erik Troschke<sup>1</sup>, Jürgen Getzschmann<sup>1</sup>, Daniel M. Többens<sup>4</sup>, Alexandra Franz<sup>4</sup>, Dirk Wallacher<sup>4</sup>, Pascal G. Yot<sup>5</sup>, Guillaume Maurin<sup>5</sup>, Eike Brunner<sup>1</sup>, Philip L. Llewellyn<sup>3</sup>, François-Xavier Coudert<sup>2</sup>, Stefan Kaskel<sup>1\*</sup>

## Supplementary Methods

Supplementary Table 1. List of chemicals used for the synthesis of ligands and MOFs.

| Name                                      | CAS        | purity | Manufacturer       |
|-------------------------------------------|------------|--------|--------------------|
| 1,1'-Ferrocenediyl-bis(diphenylphosphine) | 12150-46-8 | 99%    | Alfa Aesar         |
| 2,6-Dibromonaphthalene                    | 13720-06-4 | 99%    | ABCR               |
| 4,4''-Dibromo- <i>p</i> -terphenyl        | 17788-94-2 | n.a.   | Sigma Aldrich      |
| 4,4'-Diiodobiphenyl                       | 3001-15-8  | 99%    | Alfa Aesar         |
| 4-Bromophenylboronic acid                 | 5467-74-3  | 99%    | TCI                |
| 9 <i>H</i> -Carbazole                     | 86-74-8    | >95%   | Sigma Aldrich      |
| Acetic acid                               | 64-19-7    | 99.9%  | Roth               |
| Bis(dibenzylideneacetone)palladium(II)    | 32005-36-0 | 99%    | Sigma Aldrich      |
| Copper(I) iodide                          | 7681-65-4  | 99%    | Riedel-de Haen     |
| Copper(II) nitrate trihydrate             | 10031-43-3 | 98%    | Sigma Aldrich      |
| Hydrochloric acid                         | 7647-01-0  | 37%    | Sigma Aldrich      |
| <i>L</i> -Proline                         | 147-85-3   | 99%    | Sigma Aldrich      |
| <i>N,N'</i> -Ethylenediamine              | 107-15-3   | 99%    | Alfa Aesar         |
| <i>N,N'</i> -Dimethylethylenediamine      | 110-70-3   | 99%    | Alfa Aesar         |
| <i>N,N</i> -Dimethylformamide (DMF)       | 68-12-2    | 99%    | Fischer Scientific |
| <i>N</i> -Bromosuccinimide                | 128-08-5   | 99%    | Sigma Aldrich      |
| Potassium hydroxide                       | 1310-58-3  | 95%    | Fischer Scientific |
| Potassium carbonate                       | 584-08-7   | 99%    | Grüssing           |
| Sodium hydroxide                          | 1310-73-2  | 98.5%  | Fischer Scientific |
| Sulfuric acid                             | 7664-93-9  | 99%    | Alfa Aesar         |
| Tetrakis(triphenylphosphine)palladium(0)  | 14221-01-3 | 99%    | Sigma Aldrich      |
| Zinc cyanide                              | 557-21-1   | 98%    | Sigma Aldrich      |

### Supplementary Note 1: Synthesis of organic ligands

Attempts to synthesize  $L_3$ -derived ligands by using the synthesis conditions previously used to synthesize  $L_3$  involving lithiation and subsequent carboxylation proved difficult for synthesizing the proposed series of ligands mainly due to low solubility of the bromides and low yields. Thus, we decided to apply a different synthetic pathway (Supplementary Figure 1).

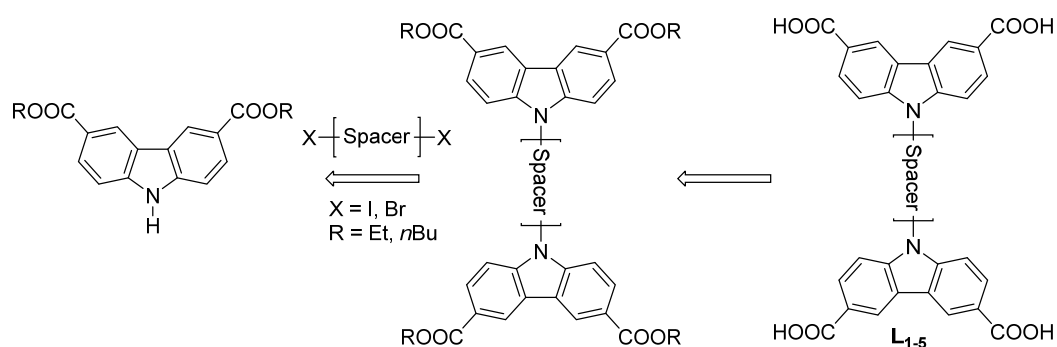

Supplementary Figure 1. Retrosynthesis for the construction of  $L_1$ -derived ligands with different spacer units.

The same approach was previously used in the synthesis of  $L_1$  in DUT-48<sup>2</sup> and PCN-81<sup>3,4</sup> (Supplementary Figure 2).

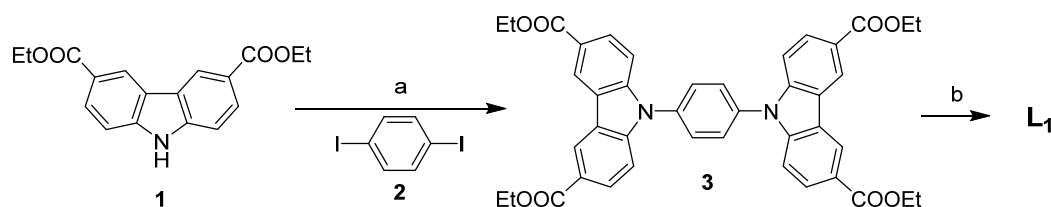

Supplementary Figure 2. Reaction sequence used to synthesize  $L_1$ : a) CuI,  $K_2CO_3$ , *L*-proline, 90-110°C, 1-8 d, b) KOH, THF,  $H_2O$ , 90 °C, 24 h.

However, the initially used procedure to synthesise ester **1** showed low yield and difficulties towards upscaling required for the synthesis of 5 different derivatives. Thus, we decided to use a protocol established by Eddaoudi et al.<sup>5</sup> developed to synthesize the carboxylic acid **7** in large quantities and high yields by hydrolysis of the corresponding cyanide which can be synthesized on large scale in two steps based on the commercially available, inexpensive 9*H*-carbazole (**4**).

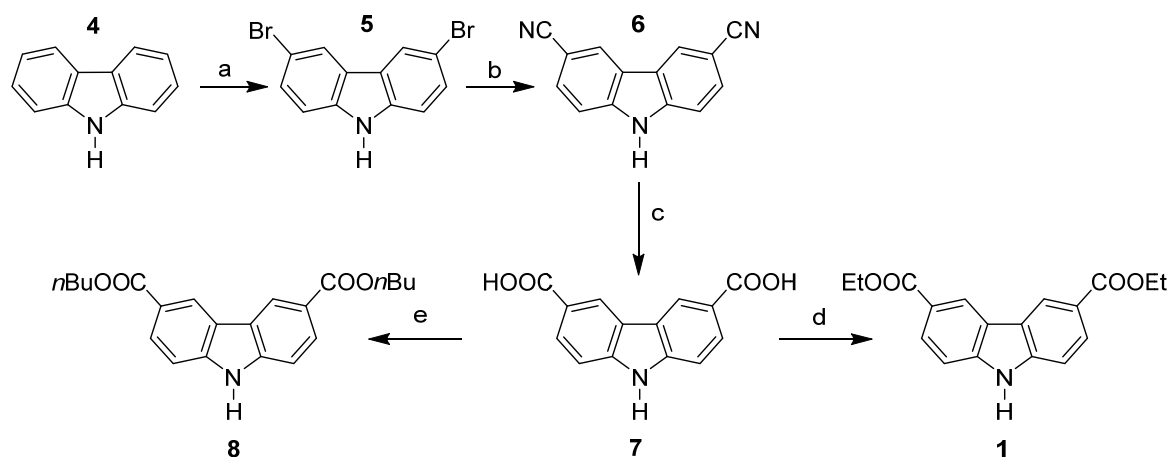

Supplementary Figure 3. Reaction sequence for the synthesis of ester **1** and **8**. a) *N*-Bromosuccinimide, THF, 30 °C, 24 h, b) ZnCN<sub>2</sub>, ZnOAc, Pd(dba)<sub>3</sub>, 1,1'-Bis(diphenylphosphino)ferrocene, DMF, 100 °C, 72 h, c) CuI (cat.), NaOH, H<sub>2</sub>O, 130 °C, 24 h, d) ethanol, H<sub>2</sub>SO<sub>4</sub> (cat.), 85 °C, 18 h, e) *n*-butanol, H<sub>2</sub>SO<sub>4</sub> (cat.), 130 °C, 48 h.

By esterification with ethanol ester **1** could be obtained in overall higher yields than the previously reported procedure and the reaction sequence allows for easier upscaling. However, attempts to synthesize L<sub>2</sub> and L<sub>3</sub> by using the ethyl ester **1** as starting material lead to the formation of the mono-coupled product which precipitated from the reaction mixture and demonstrated low solubility in DMSO and DMF. To overcome these limits of solubility we decided to substitute ethyl by *n*-butyl groups which should in general support solubility. By esterification with *n*-butanol, the *n*-butyl ester **8** could be obtained on the scale of 45 g product and overall yield of 71% over four steps. When reacted with iodide **11** via Cu-catalysed Ullmann-coupling in DMF, potassium carbonate as base and *N,N'*-dimethylethylenediamine to stabilize the catalyst at 120 °C the *n*-butyl ester **12** could be obtained with 43% yield in contrast to the previous unsuccessful synthesis using the ethyl ester **1**. The Cu-based Ullman coupling reaction was found to be the most efficient and cheapest method in contrast to Pd-based catalysts. The following reaction sequences were used to synthesize L<sub>2</sub>-L<sub>5</sub> (Supplementary Figure 4).

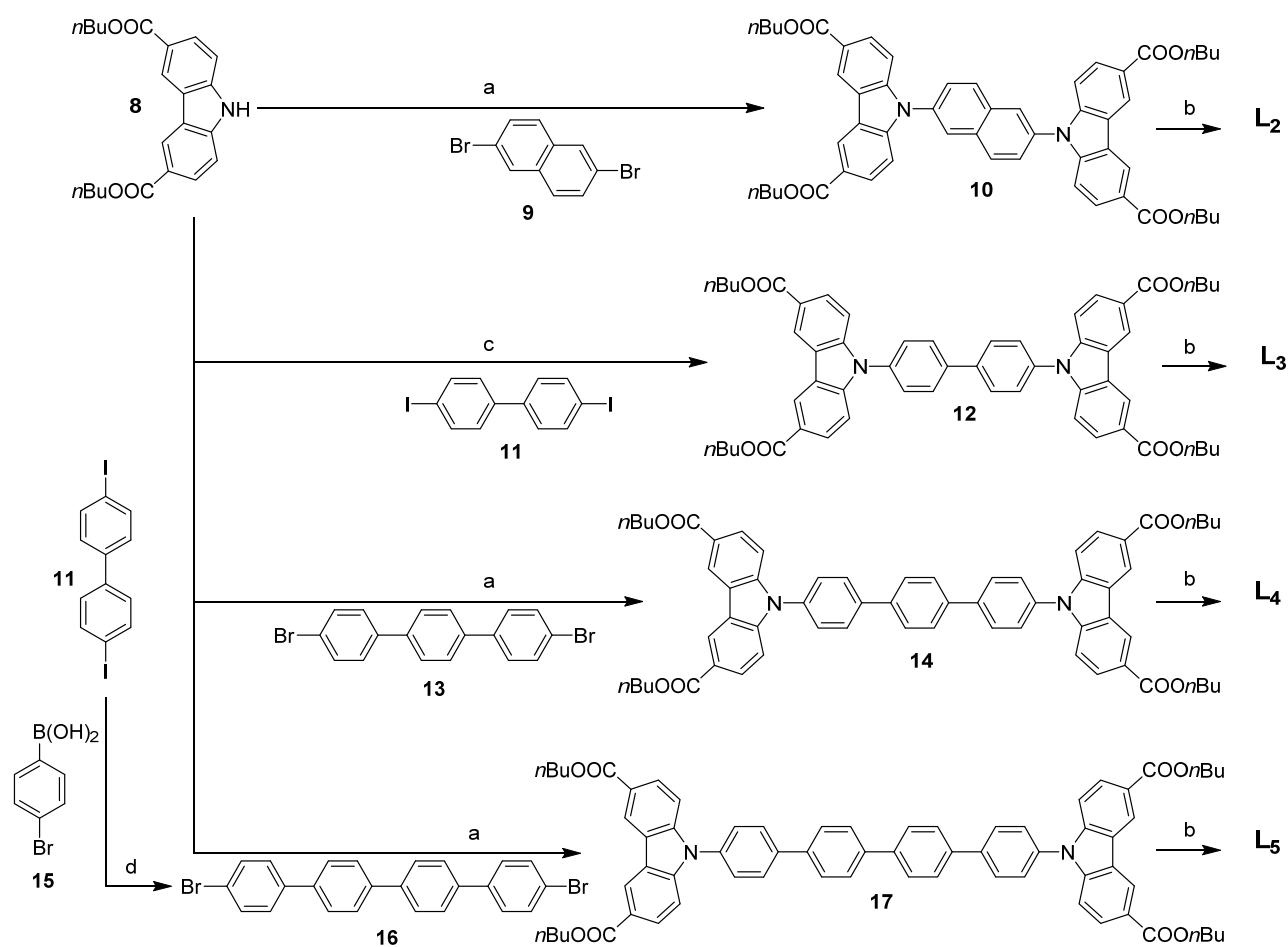

Supplementary Figure 4. Scheme for the synthesis of ligands L<sub>1</sub> – L<sub>5</sub>. a) CuI, K<sub>2</sub>CO<sub>3</sub>, DMF, *N,N'*-dimethyl ethylenediamine, 90-110 °C, 1-8 d, b) KOH, THF, H<sub>2</sub>O, 90 °C, 24 h, c) CuI, K<sub>2</sub>CO<sub>3</sub>, DMSO, *L*-proline, 90-110 °C, 1-8 d, d) tetrakis(triphenylphosphine)palladium(0), K<sub>2</sub>CO<sub>3</sub>, toluene, H<sub>2</sub>O, 100 °C, 24 h.

Based on whether the coupling reaction was performed with an iodide or bromide, reaction conditions were adjusted. Detailed description on all reactions can be found in the following:

### 3,6-Dibromo-9H-carbazole

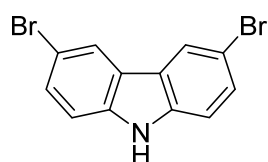

A 1 l flask was charged with 60 g (0.36 mol) 9H-carbazole which was previously recrystallized from a mixture of 900 ml toluene and 100 ml ethanol and dissolved in 800 ml anhydrous THF. To the solution 140 g (0.79 mol) *N*-bromosuccinimide was added over 30 min at room temperature and the solution was stirred for 28 h at 30 °C. The THF was removed in vacuum, the remaining solid dissolved in diethyl ether, and the solution extracted with water. The organic phases were collected, dried over MgSO<sub>4</sub> and the solvent removed in vacuum. The yellow powder was recrystallized from a mixture of 800 ml chloroform and 50 ml diethyl ether and dried in vacuum to yield 103 g (89%) of white product.

<sup>1</sup>H NMR (500 MHz, CHLOROFORM-*d*) δ (ppm): 7.33 (d, *J*=8.51 Hz, 2 H) 7.53 (dd, *J*=8.51, 1.89 Hz, 2 H) 8.15 (d, *J*=1.89 Hz, 2 H) 8.33 (br. s., 1 H).

<sup>13</sup>C NMR (151 MHz, CHLOROFORM-*d*) δ ppm 111.34 (s, 1 C) 113.69 (s, 1 CH) 123.45 (s, 1 CH) 123.99 (s, 1 C) 128.87 (s, 1 CH) 138.91 (s, 1 CH).

ASAP-MS (m/z): Calculated for C<sub>12</sub>H<sub>7</sub>Br<sub>2</sub>N: 324; found: 324 [M-H]<sup>+</sup>.

### 9H-Carbazole-3,6-dicarbonitrile

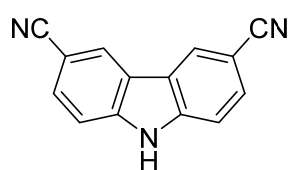

Due to the high toxicity of cyanide the reaction was performed in a sealed fume hood. Deactivation of glassware and tools used for the reaction were performed in a 5% H<sub>2</sub>O<sub>2</sub> solution containing ammonia with a pH higher than 11. A 500 ml Schlenk flask was charged with 80 g (246 mmol) of bromide **5** and 656 mg (0.59 mmol) 1,1'-bis(diphenylphosphino)ferrocene. The flask was evacuated, flushed with Ar, and 250 ml DMF and 2.4 ml water were added. In a glovebox a flask with 640 mg (9.9 mmol) Zn powder, 34.5 g (294 mmol) anhydrous zinc cyanide, 1.8 g (9.8 mmol) zinc acetate, and 460 mg (0.5 mmol) bis(dibenzylideneacetone)palladium(0) was prepared and the reactants added to the Schlenk flask. The reaction mixture was stirred at 100 °C for 72 h. Afterwards the brown suspension was cooled to room temperature and poured into an aqueous solution of 400 ml saturated ammonium chloride solution and 400 ml concentrated ammonia solution. The off-white precipitate was filtered off and washed with the same amount of previously described aqueous solution followed by thorough washing with water. The waste solutions were collected and deactivated as described above. The off-white powder was dried, washed twice with 20 ml methanol, twice with 30 ml toluene, and dried in vacuum. The solid was recrystallized from DMF to yield 48.2 g (90%) of the white product.

<sup>1</sup>H NMR (500 MHz, DMSO-*d*<sub>6</sub>) δ (ppm): 7.72 (d, *J*=8.51 Hz, 2 H) 7.85 (dd, *J*=8.20, 1.58 Hz, 2 H) 8.79 (s, 2 H) 12.38 (s, 1 H).

<sup>13</sup>C NMR (151 MHz, DMSO-*d*<sub>6</sub>) δ ppm 101.59 (s, 1 CH) 112.69 (s, 1 CH) 119.95 (s, 1 C) 121.69 (s, 1 C) 126.26 (s, 1 CH) 129.77 (s, 1 CH) 142.16 (s, 1 C).

MS-ASAP (m/z): Calculated for C<sub>14</sub>H<sub>7</sub>N<sub>3</sub>: 218; found: 218 [M+H]<sup>+</sup>.

Elemental analysis: Calculated: C: 77.41%; H: 3.25%; N: 19.34%; found: C: 78.19%; H: 3.056%; N: 19.47%.

### 9H-Carbazole-3,6-dicarboxylic acid

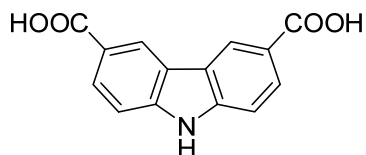

In a 2 l flask 30 g (0.13 mol) cyanide **6**, 90 g (2.25 mol) sodium hydroxide, and 300 mg (1.58 mmol) copper (I) iodide were dissolved in 1 L water and stirred under reflux for 24 h. the solution was cooled down to room temperature and filtered over Celite<sup>®</sup>. The solution was neutralized with 6 M hydrochloric acid, the white precipitate was filtered off, washed thoroughly with water, and dried at 80 °C to yield 33 g (93%) off-white powder.

<sup>1</sup>H NMR (500 MHz, DMSO-*d*<sub>6</sub>) δ ppm 7.57 (d, *J*=8.51 Hz, 2 H) 8.03 (dd, *J*=8.51, 1.89 Hz, 2 H) 8.79 - 8.85 (m, 2 H) 12.02 (s, 1 H)

<sup>13</sup>C NMR (126 MHz, DMSO-*d*<sub>6</sub>) δ ppm 11.121 (s, 1 CH), 122.03 (s, 1 C) 122.33 (s, 1 C) 122.95 (s, 1 CH) 127.80 (s, 1 CH) 143.26 (s, 1 C) 167.07 (s, 1 C) 168.82 (s, 1 C).

MS-ASAP (m/z): Calculated for C<sub>14</sub>H<sub>9</sub>NO<sub>4</sub>: 256; found: 256 [M+H]<sup>+</sup>.

Elemental analysis: Calculated (C<sub>14</sub>H<sub>9</sub>NO<sub>4</sub> 0.55·H<sub>2</sub>O): C: 63.42%; H: 3.84%; N: 5.28%; found: C: 63.44%; H: 3.681%; N: 5.08%.

DRIFT, KBr, 298 K (cm<sup>-1</sup>): 3471 (w), 2823 (w), 2644 (w), 1913 (w), 1789 (m), 1681 (s), 1633 (m), 1606 (s), 1585 (m), 1491 (w), 1470 (m), 1451 (m), 1419 (s), 1354 (m), 1288 (s), 1254 (s), 1217 (m), 1137 (w), 1024 (m), 931 (m), 898 (m), 851 (w), 828 (m), 802 (w), 769 (s), 724 (m), 682 (w).

#### Diethyl 9H-carbazole-3,6-dicarboxylate

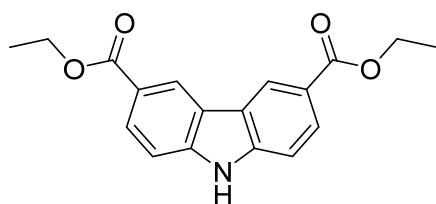

In a 250 ml flask 3 g (11.7 mmol) H<sub>2</sub>CDC **1** was suspended in 150 ml ethanol and 1 ml of sulfuric acid was added. The mixture was refluxed at 85 °C for 18 h to form a clear yellow solution. The ethanol was removed in vacuum, the resulting solid dissolved in chloroform, and extracted with diluted aqueous potassium carbonate solution. The

organic phases were combined, dried over MgSO<sub>4</sub> and the solvent removed in vacuum to obtain 3.3 g (91%) white powder.

<sup>1</sup>H NMR (500 MHz, CHLOROFORM-*d*) δ (ppm): 1.48 (t, *J*=7.09 Hz, 3 H) 4.46 (q, *J*=7.25 Hz, 2 H) 7.48 (d, *J*=8.51 Hz, 2 H) 8.20 (dd, *J*=8.51, 1.58 Hz, 2 H) 8.58 (br. s., 1 H) 8.88 (d, *J*=1.26 Hz, 2 H).

<sup>13</sup>C-NMR (150 MHz, DMSO-*d*<sub>6</sub>): δ (in ppm): 14.38 (1 CH<sub>3</sub>), 60.39 (1 CH<sub>2</sub>), 111.31 (1 CH), 121.24 (1 C), 122.29 (1 C), 122.77 (1 CH), 127.46 (1 CH), 143.25 (1 C), 166.33 (1 C).

MALDI-TOF-MS (m/z): Calculated for C<sub>18</sub>H<sub>17</sub>NO<sub>4</sub>: 266; found 266 [M-C<sub>2</sub>H<sub>5</sub>OH]<sup>+</sup>.

Elemental analysis: Calculated: C: 69.44%; H: 5.5%; N: 4.5%; found: C: 68.73%; H: 5.299%; N: 4.5%.

#### Dibutyl 9H-carbazole-3,6-dicarboxylate

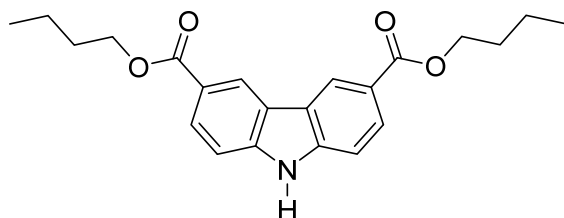

In a 1 l flask 33 g (0.13 mmol) H<sub>2</sub>CDC **1** was suspended in 750 ml 1-butanol and 3 ml of sulfuric acid was added. The mixture was refluxed at 130 °C for 48 h to form a clear yellow solution. The 1-butanol was removed in vacuum, the resulting solid dissolved in chloroform, and extracted with

diluted aqueous potassium carbonate solution. The organic phases were combined, dried over MgSO<sub>4</sub> and the solvent removed in vacuum. The obtained solid was recrystallized from ethyl acetate to obtain 45 g (95%) white powder.

<sup>1</sup>H NMR (600 MHz, CHLOROFORM-*d*) δ (ppm): 1.04 (t, *J*=7.34 Hz, 6 H) 1.51 - 1.60 (m, 4 H) 1.81 - 1.88 (m, 4 H) 4.41 (t, *J*=6.59 Hz, 4 H) 7.48 (d, *J*=8.28 Hz, 2 H) 8.19 (dd, *J*=8.47, 1.69 Hz, 2 H) 8.57 (br. s., 1 H) 8.87 (d, *J*=1.51 Hz, 2 H).

$^{13}\text{C}$  NMR (151 MHz, CHLOROFORM-*d*)  $\delta$  (ppm): 13.83 (s, 1 CH<sub>3</sub>) 19.36 (s, 1 CH<sub>2</sub>) 30.93 (s, 1 CH<sub>2</sub>) 64.82 (s, 1 CH<sub>2</sub>) 110.47 (s, 1 CH) 122.75 (s, 1 C) 123.04 (s, 1 CH) 123.14 (s, 1 C) 128.13 (s, 1 CH) 142.66 (s, 1 C) 167.20 (s, 1 C).

MALDI-TOF-MS (m/z): Calculated for C<sub>36</sub>H<sub>20</sub>Br<sub>4</sub>N<sub>2</sub>: 294; found 294 [M-C<sub>4</sub>H<sub>9</sub>OH]<sup>+</sup>.

Elemental analysis: Calculated: C: 71.91%; H: 6.86%; N: 3.81%; found: C: 72.01%; H: 6.443%; N: 3.68%.

## Synthesis of L<sub>3</sub> and analogues

### General procedure of Ullman coupling

The general synthesis of ligands derived from H<sub>2</sub>CDC is based on Ullmann coupling of the esters **8** or **1** with different iodides and bromines. The following procedures were used:

#### Ullmann Coupling with iodides

This procedure is based on syntheses previously used for carbazole based ligands<sup>6</sup>. A Schlenk flask was charged with indicated amounts of ester **8**, the corresponding iodide, potassium carbonate, copper (I) iodide, and *L*-proline under inert atmosphere. To the mixture indicated amounts of degassed DMSO or DMF were given and Ar was bubbled through the suspension for 30 min. The reaction mixture was stirred at 90 – 120 °C for 24 h to 10 d and the reaction was cooled down to room temperature. The suspension was quenched with diluted (< 0.02 M) hydrochloric acid and extracted with chloroform. The organic phases were collected, dried over MgSO<sub>4</sub>, and the solvent removed in vacuum. The crude product was purified by flash column chromatography using indicated mixtures of chloroform, DCM, *iso*-hexane and ethyl acetate. Corresponding amounts of the chemicals added and used for the synthesis and purification are provided for each coupling product.

#### Ullmann Coupling with bromides

This procedure is based on syntheses previously used for carbazole based ligands<sup>4</sup>. A Schlenk flask was charged with indicated amounts of ester **8**, the corresponding bromide, potassium carbonate, copper (I) iodide, and *N,N'*-dimethylethylenediamine under inert atmosphere. To the mixture indicated amounts of degassed anhydrous 1,4-dioxane were given and Ar was bubbled through the suspension for 30 min. The reaction mixture was stirred at 80 – 110 °C for 24 h to 12 d and the reaction was cooled down to room temperature. The solvent was removed in vacuum and the obtained powder was dissolved in chloroform and extracted with diluted (< 0.02 M) hydrochloric acid. The organic phases were collected, dried over MgSO<sub>4</sub>, and the solvent removed in vacuum. The crude product was purified by flash column chromatography using indicated mixtures of chloroform, DCM, *iso*-hexane and ethyl acetate. Corresponding amounts of the chemicals added and used for the synthesis and purification, reaction times and temperatures are provided for each coupling product.

#### General procedure for ester hydrolysis

To hydrolyse the ester groups the corresponding coupling products were dissolved in indicated volumes of THF, methanol, and water at 85 °C. To the solution potassium hydroxide was added and the mixture was stirred at 85 °C for 12 h– 5 d. In case a precipitate formed from the previous clear solution (most



likely the potassium salt of the hydrolysed ester which is insoluble in THF) small amounts of water were added until a clear solution formed again. After the indicated reaction time THF and methanol were removed in vacuum, the resulting solution was filtered, and neutralized with 2 M hydrochloric acid. The precipitate was filtered off and dried in vacuum at room temperature. Corresponding amounts of the chemicals added and reaction times are provided for each hydrolysis product.

### Variation of ligand length

#### Tetraethyl 9,9'-(1,4-phenylene)bis(9H-carbazole-3,6-dicarboxylate)

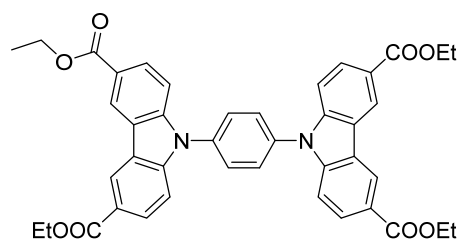

Synthesis conditions: 4.5 g (14.4 mmol) ethylester **1**, 2.16 mg (0.74 mmol) 4,4'-diiodophenyl, 3.63 g (26.3 mmol) potassium carbonate, 250 mg (1.31 mmol) copper(I) iodide, 104 mg (2.62 mmol) *L*-proline, 80 ml DMSO, 85 °C for 24 h and 95 °C for 48 h; Recrystallized from ethyl acetate.

Yield: 3 g (65%) white powder.

<sup>1</sup>H-NMR (500 MHz, DMSO-*d*<sub>6</sub>): δ (ppm): 1.38 (tr, *J* = 7.0 Hz, 6 H), 4.33 (q, *J* = 7.0 Hz, 4 H), 7.65 (dd, *J* = 8.5 Hz, *J* = 0.6 Hz, 2 H), 8.11 (dd, *J* = 8.5 Hz, *J* = 1.7, 2 H), 8.89 (dd, *J* = 1.7 Hz, *J* = 0.6 Hz, 2 H), 12 (s, 1 H).

<sup>13</sup>C-NMR (150 MHz, DMSO-*d*<sub>6</sub>): δ (ppm): 14.34 (1 CH<sub>3</sub>), 60.39 (1 CH<sub>2</sub>), 111.35 (1 CH), 121.25 (1 C), 122.29 (1 C), 122.71 (1 CH), 127.486 (1 CH), 143.25 (1 C), 166.39 (1 C).

#### 9,9'-(1,4-phenylene)bis(9H-carbazole-3,6-dicarboxylic acid)

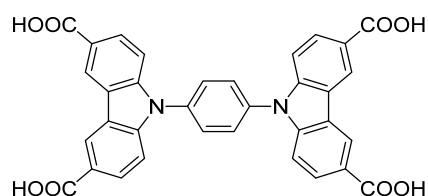

Synthesis conditions: 3 g (4.31 mmol) ester **3**, 1.44 g (20.7 mmol) potassium hydroxide, 115 ml THF, 3 ml methanol, 50 ml H<sub>2</sub>O, 75 °C for 2 d.

Yield: 2.35 g (93%) white powder.

<sup>1</sup>H NMR (500 MHz, DMSO-*d*<sub>6</sub>) δ (ppm): 7.68 (d, *J*=8.51 Hz, 1 H) 8.03 (s, 1 H) 8.15 (dd, *J*=8.83, 1.58 Hz, 1 H) 9.01 (d, *J*=1.58 Hz, 1 H) 12.69 (s, 1 H)

<sup>13</sup>C-NMR (150 MHz, DMSO-*d*<sub>6</sub>) δ (ppm): 110.04 (1 CH), 123.1 (1 C), 123.51 (1 CH), 124.02 (1 C), 128.79 (1 CH), 129.29 (1 CH), 136.03 (1 C), 143.85 (1 C), 168 (1 C).

Elemental analysis: Calculated (C<sub>34</sub>H<sub>20</sub>N<sub>2</sub>O<sub>8</sub> · 1.76·H<sub>2</sub>O): C: 66.27%; H: 3.85%; N: 4.55%; found: C: 66.22%; H: 3.85%; N: 4.61%.

DRIFT, KBr, 298 K (cm<sup>-1</sup>): 3070 (w), 2647 (w), 1694 (w), 1627 (s), 1602 (m), 1518 (s), 1475 (m), 1416 (m), 1339 (w), 1292 (s), 1266 (s), 1179 (m), 1137 (w), 1027 (s), 950 (w), 904 (m), 818 (m), 805 (w), 768 (s), 722 (w), 703 (w), 666 (w).

### Tetrabutyl 9,9'-(naphthalene-2,6-diyl)bis(9H-carbazole-3,6-dicarboxylate)

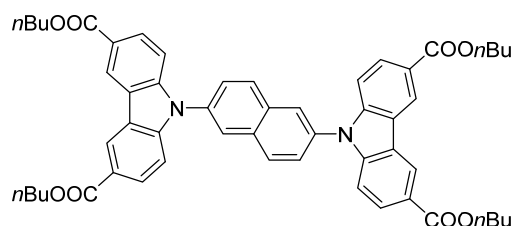

Synthesis conditions: 3.76 g (10.2 mmol) *n*-butylester **8**, 0.98 g (3.41 mmol) 2,6-dibromonaphthalene, 1.88 g (13.6 mmol) potassium carbonate, 428 mg (2.12 mmol) copper(I) iodide, 0.1 ml (0.91 mmol) *N,N'*-dimethylethylenediamine, 30 ml anhydr. 1,4 dioxane, 110 °C for 3 d; Flash column chromatography chloroform : *iso*-hexane : ethyl acetate = 1 : 0.03 : 0.06 ( $R_f$  0.53); Yield: 2.81 g (96%) white powder.

$^1\text{H}$  NMR (500 MHz, CHLOROFORM-*d*)  $\delta$  (ppm): 1.05 (t,  $J=7.41$  Hz, 6 H) 1.52 - 1.65 (m, 4 H) 1.83 - 1.92 (m, 4 H) 4.44 (t,  $J=6.78$  Hz, 4 H) 7.51 (d,  $J=8.51$  Hz, 2 H) 7.81 (dd,  $J=8.67$ , 1.73 Hz, 1 H) 8.21 (d,  $J=1.89$  Hz, 1 H) 8.22 - 8.25 (m, 3 H) 8.99 (s, 2 H).

$^{13}\text{C}$  NMR (126 MHz, CHLOROFORM-*d*)  $\delta$  (ppm): 14.10 (s, 1 CH<sub>3</sub>) 19.63 (s, 1 CH<sub>2</sub>) 31.18 (s, 1 CH<sub>2</sub>) 65.17 (s, 1 CH<sub>2</sub>) 109.92 (s, 1 CH) 123.37 (s, 1 C) 123.58 (s, 1 CH) 123.73 (s, 1 C) 126.03 (s, 1 CH) 126.42 (s, 1 C) 128.61 (s, 1 CH) 130.66 (s, 1 CH) 133.54 (s, 1 C) 135.32 (s, 1 C) 144.44 (s, 1 C) 167.28 (s, 1 C) 171.41 (s, 1 C).

Elemental analysis: Calculated: C: 75.5%; H: 6.34%; N: 3.26%; found: C: 75.93%; H: 6.342%; N: 2.91%.

### 9,9'-(naphthalene-2,6-diyl)bis(9H-carbazole-3,6-dicarboxylic acid)

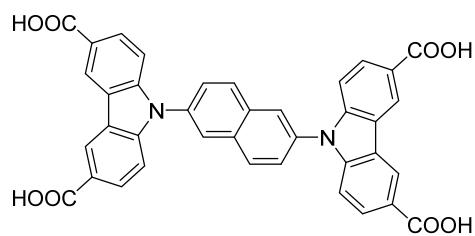

Synthesis conditions: 1.7 g (1.98 mmol) ester **10**, 1 g (17.6 mmol) potassium hydroxide, 33 ml THF, 5 ml methanol, 16 ml H<sub>2</sub>O, 75 °C for 3 d.; Yield: 1.18 g (94%) white powder.

$^1\text{H}$  NMR (500 MHz, DMSO-*d*<sub>6</sub>)  $\delta$  (ppm): 7.59 (d,  $J=8.51$  Hz, 2 H) 7.91 - 7.99 (m, 1 H) 8.14 (dd,  $J=8.83$ , 1.26 Hz, 2 H) 8.44 (d,  $J=8.83$  Hz, 1 H) 8.53 (s, 1 H) 9.03 (s, 2 H) 12.84 (br. s., 2 H).

$^{13}\text{C}$  NMR (126 MHz, DMSO-*d*<sub>6</sub>)  $\delta$  (ppm): 110.09 (s, 1 CH) 122.66 (s, 1 C) 123.13 (s, 1 CH) 123.61 (s, 1 C) 125.78 (s, 1 CH) 125.95 (s, 1 C) 128.43 (s, 1 CH) 130.69 (s, 1 CH) 133.04 (s, 1 C) 134.26 (s, 1 C) 143.63 (s, 1 C) 167.63 (s, 1 C).

MALDI-TOF-MS ( $m/z$ ): Calculated for C<sub>38</sub>H<sub>22</sub>N<sub>2</sub>O<sub>8</sub>: 634; found 634 [ $M$ ]<sup>+</sup>.

Elemental analysis: Calculated (C<sub>38</sub>H<sub>22</sub>N<sub>2</sub>O<sub>8</sub> · 1.15·H<sub>2</sub>O): C: 70.29%; H: 3.84%; N: 4.41%; found: C: 70.29%; H: 3.84%; N: 3.56%.

DRIFT, KBr, 298 K (cm<sup>-1</sup>): 3065(w), 2642 (w), 1694 (s), 1629 (m), 1601 (s), 1508 (w), 1477 (s), 1393 (s), 1342 (m), 1236 (s), 1159 (m), 1137 (m), 1027 (w), 923 (w), 904 (m), 828 (m), 768 (s), 737 (w), 724 (w), 687 (w).

Tetrabutyl 9,9'-([1,1'-biphenyl]-4,4'-diyl)bis(9H-carbazole-3,6-dicarboxylate)

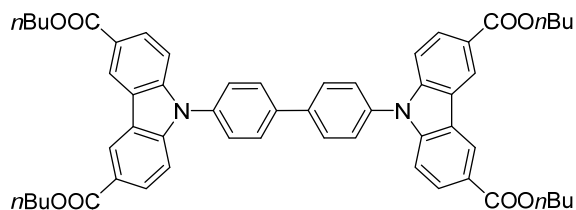

Synthesis conditions: 815 mg (2.22 mmol) *n*-butylester **8**, 300 mg (0.74 mmol) 4,4'-diiodobiphenyl, 224 mg (1.62 mmol) potassium carbonate, 90 mg (0.66 mmol) copper(I) iodide, 104 mg (0.9 mmol) *L*-proline, 15 ml anhydr. DMF, 120 °C for 48 h; Flash column chromatography DCM : chloroform : ethyl acetate –

0.1:1:0.010 ( $R_f$  0.6); Yield: 280 mg (43%) white powder.

$^1\text{H}$  NMR (300 MHz, CHLOROFORM-*d*)  $\delta$  (ppm): 1.05 (t,  $J=7.37$  Hz, 4 H) 1.57 (dq,  $J=14.94, 7.36$  Hz, 3 H) 1.76 - 1.93 (m, 3 H) 4.43 (t,  $J=6.61$  Hz, 3 H) 7.50 (d,  $J=8.69$  Hz, 2 H) 7.73 (d,  $J=8.50$  Hz, 2 H) 7.98 (d,  $J=8.50$  Hz, 2 H) 8.21 (dd,  $J=8.69, 1.70$  Hz, 2 H) 8.96 (d,  $J=1.32$  Hz, 2 H).

$^{13}\text{C}$  NMR (126 MHz, CHLOROFORM-*d*)  $\delta$  (ppm): 13.81 (s, 1 CH<sub>3</sub>) 19.34 (s, 1 CH<sub>2</sub>) 30.88 (s, 1 C H<sub>2</sub>) 64.85 (s, 1 C H<sub>2</sub>) 109.72 (s, 1 CH) 122.98 (s, 1 CH) 123.19 (s, 1 C) 123.25 (s, 1 C) 127.52 (s, 1 CH) 128.20 (s, 1 CH) 128.85 (s, 1 CH) 136.14 (s, 1 C) 140.01 (s, 1 C) 144.02 (s, 1 C) 167.00 (s, 1 C).

Elemental analysis: Calculated: C: 76%; H: 6.38%; N: 3.17%; found: C: 75.69%; H: 6.172%; N: 2.98%.

9,9'-([1,1'-biphenyl]-4,4'-diyl)bis(9H-carbazole-3,6-dicarboxylic acid)

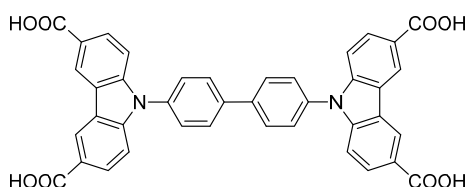

Synthesis conditions: 150 mg (0.17 mmol) ester **12**, 700 mg (12.3 mmol) potassium hydroxide, 18 ml THF, 1 ml methanol, 0.5 ml H<sub>2</sub>O + 3 ml H<sub>2</sub>O after 1 d, 85 °C for 72 h; Yield: 60 mg (54%) white powder.

$^1\text{H}$  NMR (300 MHz, DMSO-*d*<sub>6</sub>)  $\delta$  (ppm): 7.55 (d,  $J=8.69$  Hz, 1 H) 7.86 (d,  $J=8.50$  Hz, 1 H) 8.09 - 8.20 (m, 2 H) 9.01 (d,  $J=1.51$  Hz, 1 H) 12.85 (br. s., 1 H).

$^{13}\text{C}$  NMR (75 MHz, DMSO-*d*<sub>6</sub>)  $\delta$  (ppm): 110.02 (s, 1 CH) 122.61 (s, 1 C) 123.06 (s, 1 CH) 123.51 (s, 1 C) 127.56 (s, 1 CH) 128.34 (s, 1 CH) 128.80 (s, 1 CH) 135.50 (s, 1 C) 139.17 (s, 1 C) 143.42 (s, 1 C) 167.61 (s, 1 C).

Elemental analysis: Calculated (C<sub>40</sub>H<sub>24</sub>N<sub>2</sub>O<sub>8</sub> · 3·H<sub>2</sub>O): C: 67.22%; H: 4.23%; N: 3.92%; found: C: 66.78%; H: 3.73%; N: 3.96%.

DRIFT, KBr, 298 K (cm<sup>-1</sup>): 3037 (w), 2619 (w), 1894 (m), 1657 (s), 1631 (s), 1602 (s), 1503 (s), 1403 (m), 1347 (m), 1298 (m), 1258 (s), 1186 (m), 1169 (m), 1135 (s), 1105 (w), 1062 (s), 1027 (m), 1007 (w), 915 (m), 899 (w), 855 (w), 813 (w), 757 (m), 715 (w), 669 (w).

Tetrabutyl 9,9'-([1,1':4',1''-terphenyl]-4,4''-diyl)bis(9H-carbazole-3,6-dicarboxylate)

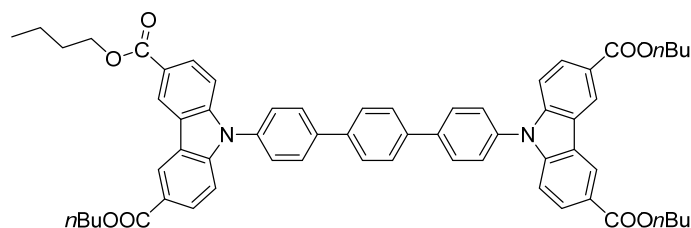

Synthesis conditions: 5.71 g (15.5 mmol) *n*-butylester **8**, 2 g (5.18 mmol) 4,4''-dibromo-*p*-terphenyl, 2.86 g (20.7 mmol) potassium carbonate, 326 mg (1.71 mmol) copper(I) iodide, 0.1 ml (0.91 mmol) *N,N'*-

dimethylethylenediamine, 80 ml anhydr. 1,4 dioxane, 110 °C for 8 d; Flash column chromatography chloroform : *iso*-hexane : ethyl acetate – 1 : 0.5 : 0.02 ( $R_f$  0.55); Yield: 3.65 g (95%) white powder.

$^1\text{H}$  NMR (500 MHz, CHLOROFORM-*d*)  $\delta$  (ppm): 1.05 (t,  $J=7.41$  Hz, 3 H) 1.57 (s, 2 H) 1.72 - 1.90 (m, 2 H) 4.43 (t,  $J=6.62$  Hz, 2 H) 7.50 (d,  $J=8.83$  Hz, 1 H) 7.69 (d,  $J=8.51$  Hz, 1 H) 7.88 (s, 1 H) 7.96 (d,  $J=8.20$  Hz, 1 H) 8.21 (dd,  $J=8.51, 1.58$  Hz, 1 H) 8.96 (d,  $J=1.58$  Hz, 1 H).

$^{13}\text{C}$  NMR (126 MHz, CHLOROFORM-*d*)  $\delta$  (ppm): 13.84 (s, 1 CH<sub>3</sub>) 19.38 (s, 1 CH<sub>2</sub>) 30.93 (s, 1 CH<sub>2</sub>) 64.88 (s, 1 CH<sub>2</sub>) 109.80 (s, 1 CH) 123.03 (s, 1 C) 123.20 (s, 1 C) 123.24 (s, 1 CH) 127.46 (s, 1 CH) 127.80 (s, 1 CH) 128.22 (s, 1 CH) 128.73 (s, 1 CH) 135.82 (s, 1 C) 139.43 (s, 1 C) 140.65 (s, 1 C) 144.16 (s, 1 C) 167.14 (s, 1 C).

MALDI-TOF-MS (m/z): Calculated for C<sub>62</sub>H<sub>60</sub>N<sub>2</sub>O<sub>8</sub>: 887; found: 887 [M-C<sub>4</sub>H<sub>9</sub>OH]<sup>+</sup>.

Elemental analysis: Calculated: C: 77.48%; H: 6.29%; N: 2.91%; found: C: 77.57%; H: 5.46%; N: 2.93%.

9,9'-([1,1':4',1''-Terphenyl]-4,4''-diyl)bis(9H-carbazole-3,6-dicarboxylic acid)

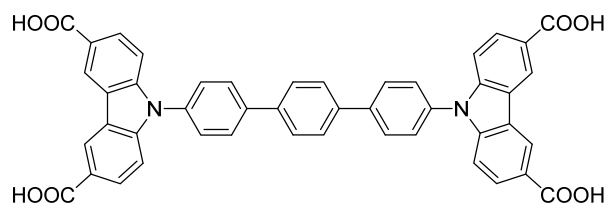

Synthesis conditions: 3.6 g (3.75 mmol) ester **14**, 8 g (144 mmol) potassium hydroxide, 350 ml THF, 30 ml methanol, 2 ml H<sub>2</sub>O, 90 °C for 24 h; Yield: 2.65 g (96%) white powder.

$^1\text{H}$  NMR (500 MHz, DMSO-*d*<sub>6</sub>)  $\delta$  (ppm): 7.53 (d,  $J=8.51$  Hz, 1 H) 7.79 (d,  $J=7.88$  Hz, 1 H) 7.96 (s, 1 H) 8.08 (d,  $J=8.20$  Hz, 1 H) 8.12 (d,  $J=8.51$  Hz, 1 H) 8.99 (s, 1 H) 12.79 (br. s., 1 H).

$^{13}\text{C}$  NMR (126 MHz, DMSO-*d*<sub>6</sub>)  $\delta$  (ppm): 109.89 (s, 1 CH) 122.47 (s, 1 C) 122.93 (s, 1 C) 123.36 (s, 1 CH) 127.32 (s, 1 CH) 127.43 (s, 1 CH) 128.23 (s, 1 C) 128.35 (s, 1 CH) 135.09 (s, 1 C) 138.38 (s, 1 C) 139.40 (s, 1 C) 143.32 (s, 1 C) 167.53 (s, 1 C).

Elemental analysis: Calculated (C<sub>46</sub>H<sub>28</sub>N<sub>2</sub>O<sub>8</sub>·3.85H<sub>2</sub>O): C: 68.54%; H: 4.46%; N: 3.48%; found: C: 68.15%; H: 4.027%; N: 3.40%.

DRIFT, KBr, 298 K (cm<sup>-1</sup>): 3069 (w), 2628 (w), 1907 (w), 1695 (s), 1630 (m), 1600 (s), 1533 (w), 1494 (s), 1365 (m), 1291 (s), 1235 (s), 1173 (m), 1137 (m), 1027 (w), 1005 (m), 949 (w), 905 (w), 815 (s), 770 (s), 726 (m), 680 (w).

#### 4,4'''-Dibromo-1,1':4',1'':4'',1'''-quaterphenyl

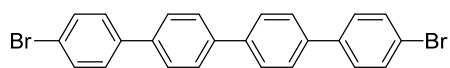

A flame-dried 500 ml Schlenk flask was charged with 1.7 g (3.36 mmol) iodide **11**, 1.45 g (7.22 mmol) 4-bromophenylboronic acid **15**, 2.7 g (19.5 mmol) potassium carbonate, 43 mg (0.037 mmol) tetrakis(triphenylphosphine)palladium(0), and a degassed mixture of 105 ml toluene, 15 ml water and 60 ml methanol. The brown suspension was refluxed under inert atmosphere at 110 °C for 3 d. The solvents were removed in vacuum and the remaining solid dissolved in chloroform, extracted with water, and the combined organic phases dried over MgSO<sub>4</sub>. The obtained yellow solid was purified by flash column chromatography using an iso-hexane : chloroform (2 : 1) mixture (*R<sub>f</sub>* 0.54) to obtain 850 mg (45 %) of white powder.

No NMR spectra could be collected due to low solubility in common organic solvents.

MALDI-TOF-MS (*m/z*): Calculated for C<sub>24</sub>H<sub>16</sub>Br<sub>2</sub>: 463; found: 463 [M]<sup>+</sup>.

Elemental analysis: Calculated: C: 62.1%; H: 3.47%; found: C: 62.22%; H: 3.54%.

DRIFT, KBr, 298 K (cm<sup>-1</sup>): 2585 (w), 2297 (w), 1912 (m), 1898 (m), 1778 (w), 1681 (w), 1646 (w), 1596 (m), 1476 (s), 1436 (m), 1388 (s), 1347 (m), 1281 (m), 1181 (w), 1141 (m), 1121 (m), 1103 (m), 1075 (s), 1043 (w), 1009 (m), 1000 (s), 964 (w), 860 (m), 843 (m), 822 (s), 807 (s), 764 (m), 750 (m), 742 (m), 695 (m), 660 (w), 642 (m), 624 (w).

#### Tetrabutyl 9,9'-([1,1':4',1'':4'',1'''-quaterphenyl]-4,4'''-diyl)bis(9H-carbazole-3,6-dicarboxylate)

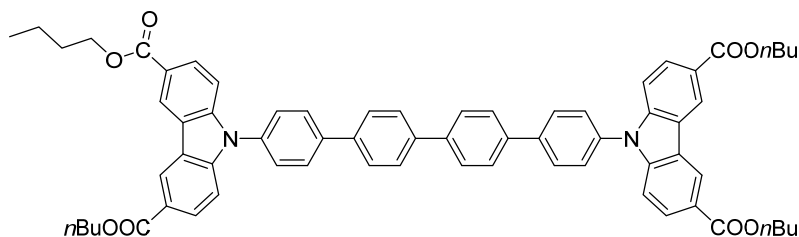

Synthesis conditions: 7.12 g (19.4 mmol) *n*-butylester **8**, 3 g (6.46 mmol) 4,4'''-dibromo-1,1':4',1'':4'',1'''-quaterphenyl **16**, 3.57 g (25.8 mmol) potassium carbonate, 613 mg (3.23 mmol) copper(I) iodide, 0.1 ml (0.91 mmol) *N,N'*-dimethylethylenediamine, 80 ml anhydr. 1,4 dioxane, 110 °C for 8 d; Flash column chromatography chloroform : *iso*-hexane : ethyl acetate – 1 : 0.3 : 0.01 (*R<sub>f</sub>* 0.29); Yield: 1.96 g (29%) white powder.

<sup>1</sup>H NMR (500 MHz, CHLOROFORM-*d*) δ (ppm): 1.05 (t, *J*=7.41 Hz, 3 H) 1.51 - 1.70 (m, 1 H) 1.74 - 1.91 (m, 1 H) 4.43 (t, *J*=6.62 Hz, 1 H) 7.49 (d, *J*=8.83 Hz, 1 H) 7.67 (d, *J*=8.51 Hz, 1 H) 7.84 (d, *J*=2.21 Hz, 2 H) 7.94 (d, *J*=8.51 Hz, 1 H) 8.20 (dd, *J*=8.51, 1.58 Hz, 1 H) 8.96 (d, *J*=1.58 Hz, 1 H).

<sup>13</sup>C NMR (126 MHz, CHLOROFORM-*d*) δ (ppm): 14.10 (s, 1 CH<sub>3</sub>) 19.63 (s, 1 CH<sub>2</sub>) 31.17 (s, 1 C) CH<sub>2</sub>) 65.12 (s, 1 C CH<sub>2</sub>) 110.06 (s, 1 CH) 123.26 (s, 1 CH) 123.43 (s, 1 C) 127.65 (s, 1 CH) 127.88 (s, 1 CH) 128.45 (s, 1 CH) 128.92 (s, 1 CH) 135.91 (s, 1 C) 139.28 (s, 1 C) 140.19 (s, 1 C) 141.03 (s, 1 C) 144.39 (s, 1 C) 167.33 (s, 1 C).

MALDI-TOF-MS (*m/z*): Calculated for C<sub>68</sub>H<sub>64</sub>N<sub>2</sub>O<sub>8</sub>: 963; found: 963 [M-C<sub>4</sub>H<sub>9</sub>OH]<sup>+</sup>.

Elemental analysis: Calculated: C: 78.47%; H: 6.22%; N: 2.7%; found: C: 77.88%; H: 6.117%; N: 2.79%.

9,9'-([1,1':4',1'':4'',1''':4''',1''''-Quaterphenyl]-4,4'''-diyl)bis(9H-carbazole-3,6-dicarboxylic acid)

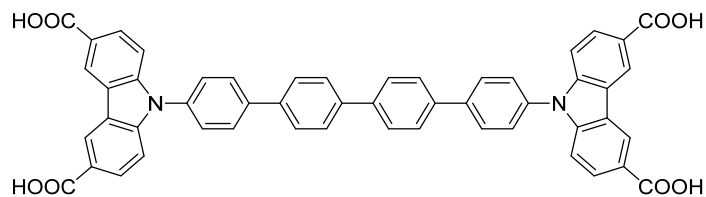

Synthesis conditions: 1.95 g (1.88 mmol) ester **17**, 1.4 g (24.6 mmol) potassium hydroxide, 120 ml THF, 2 ml methanol, 5 ml H<sub>2</sub>O, 85 °C for 3 d; Yield: 1.5 g (98%) white powder.

<sup>1</sup>H NMR (500 MHz, DMSO-*d*<sub>6</sub>) δ (ppm): 7.53 (d, *J*=8.83 Hz, 1 H) 7.78 (d, *J*=8.20 Hz, 1 H) 7.93 (s, 2 H) 8.07 (d, *J*=8.51 Hz, 1 H) 8.12 (dd, *J*=8.51, 1.58 Hz, 1 H) 8.99 (s, 1 H) 12.73 (s, 1 H).

<sup>13</sup>C NMR (126 MHz, DMSO-*d*<sub>6</sub>) δ (ppm): 110.12 (s, 1 CH) 122.66 (s, 1 C) 123.14 (s, 1 CH) 123.54 (s, 1 C) 127.38 (s, 1 CH) 127.53 (s, 1 CH) 127.56 (s, 1 C) 128.44 (s, 1 CH) 128.53 (s, 1 CH) 135.22 (s, 1 C) 138.31 (s, 1 C) 138.94 (s, 1 C) 139.69 (s, 1 C) 143.53 (s, 1 C) 167.75 (s, 1 C).

Elemental analysis: Calculated (C<sub>52</sub>H<sub>32</sub>N<sub>2</sub>O<sub>8</sub> · 2.85·H<sub>2</sub>O): C: 72.27%; H: 4.4%; N: 3.24%; found: C: 72.10%; H: 4.197%; N: 3.25%.

DRIFT, KBr, 298 K (cm<sup>-1</sup>): 3627 (w, br), 2629 (w), 1907 (w), 1694 (s), 1630 (m), 1601 (m), 1523 (m), 1489 (s), 1401 (m), 1364 (m) 1290 (s), 1250 (s), 1173 (m), 1137 (w), 1027 (w), 1003 (w), 949 (w), 907 (m), 813 (s), 770 (m), 735 (w), 725 (w), 692 (w).

## Supplementary Note 2: Synthesis of microcrystalline MOF powders

In a previous study we have demonstrated that large crystals of DUT-49 show enhanced adsorption capacity and pronounced NGA<sup>7</sup>. Thus, the reaction conditions for the synthesis of DUT-48, -46, -50, -151 were chosen to produce crystals of average size above 2  $\mu\text{m}$ , based on the reaction of DUT-49 by using acetic acid as modulator in a solvothermal reaction of ligands L<sub>1</sub> - L<sub>5</sub> at 80 °C. Because NMP was found to partially reduce Cu<sup>2+</sup> if the reactions were carried out over 72 h or longer, we chose to use DMF instead. Due to the lower solubility especially of ligand L<sub>1</sub> and L<sub>2</sub> in DMF, larger amounts of DMF in comparison to NMP were used. The reaction conditions including the corresponding mean crystal size of the activated MOF powders are summarized in Supplementary Table 2.

Supplementary Table 2. Reaction conditions and corresponding mean crystal size.

| Material ID | $m_{\text{ligand}}$ (mg) | $n_{\text{ligand}}$ (mmol) | $m_{\text{Cu(NO}_3)_2 \cdot 3\text{H}_2\text{O}}$ (mg) | $n_{\text{Cu(NO}_3)_2 \cdot 3\text{H}_2\text{O}}$ (mmol) | $V_{\text{Acetic acid}}$ (ml) | $n_{\text{Acetic acid}}$ (mmol) | Eq.per ligand | $V_{\text{solvent}}$ (ml) | $t_{\text{Reaction}}$ (h) | Yield (%) <sup>[a]</sup> | Mean crystal size/ RSD (nm) |
|-------------|--------------------------|----------------------------|--------------------------------------------------------|----------------------------------------------------------|-------------------------------|---------------------------------|---------------|---------------------------|---------------------------|--------------------------|-----------------------------|
| DUT-46      | 800                      | 1.26                       | 760                                                    | 3.15                                                     | 16                            | 279.7                           | 222           | 400                       | 48                        | 83.8                     | 2488±1709                   |
| DUT-48      | 1000                     | 1.71                       | 1030                                                   | 4.26                                                     | 12                            | 209.8                           | 123           | 800                       | 72                        | 82.7                     | 4065±2194                   |
| DUT-49      | 1000                     | 1.53                       | 935                                                    | 3.86                                                     | 7.5                           | 240                             | 150           | 172                       | 44                        | 39.3                     | 3488±1574                   |
| DUT-50      | 500                      | 0.68                       | 410                                                    | 1.70                                                     | 7.75                          | 135.5                           | 199           | 150                       | 48                        | 63.4                     | 8016±6048                   |
| DUT-151     | 400                      | 0.49                       | 480                                                    | 1.99                                                     | 4                             | 69.9                            | 142           | 95                        | 48                        | 73.8                     | 9380±3858                   |

<sup>[a]</sup> yield based on L<sub>3</sub> after supercritical activation. Actual yields of reaction may be higher, <sup>[b]</sup> NMP used instead of DMF due to solubility limitations.

To obtain crystals with sizes large enough for single crystal X-ray diffraction (> 90  $\mu\text{m}$ ) we adapted the reaction conditions by diluting the reaction mixture with DMF and increasing the amount of acetic acid acting as modulator. The reaction conditions are summarized in Supplementary Table 3.

Supplementary Table 3. Synthesis conditions.

| Material ID | $m_{\text{Ligand}}$ (mg) | $n_{\text{Ligand}}$ ( $\mu\text{mol}$ ) | $m_{\text{Cu}(\text{NO}_3)_2 \cdot 3\text{H}_2\text{O}}$ (mg) | $n_{\text{Cu}(\text{NO}_3)_2 \cdot 3\text{H}_2\text{O}}$ ( $\mu\text{mol}$ ) | $V_{\text{Acetic acid}}$ ( $\mu\text{l}$ ) | $n_{\text{Acetic acid}}$ (mmol) | <i>Eq. per ligand</i> | $V_{\text{DMF}}$ (ml) | $t_{\text{Reaction}}$ (d) | Crystal shape and size          |
|-------------|--------------------------|-----------------------------------------|---------------------------------------------------------------|------------------------------------------------------------------------------|--------------------------------------------|---------------------------------|-----------------------|-----------------------|---------------------------|---------------------------------|
| DUT-46      | 10                       | 15.8                                    | 9.5                                                           | 39.3                                                                         | 0.27                                       | 4.7                             | 299                   | 4                     | 2                         | Cubes, 90 $\mu\text{m}$         |
| DUT-48      | 10                       | 17.1                                    | 9.8                                                           | 40.6                                                                         | 0.11                                       | 1.9                             | 112                   | 5                     | 3                         | Cubes, 90 $\mu\text{m}$         |
| DUT-49      | 10                       | 15.1                                    | 9.5                                                           | 39.3                                                                         | 0.5                                        | 8.7                             | 577                   | 4                     | 5                         | Cubes, 130 $\mu\text{m}$        |
| DUT-50      | 10                       | 13.6                                    | 8.2                                                           | 33.9                                                                         | 0.16                                       | 2.8                             | 206                   | 4                     | 3                         | Cuboctahedra, 110 $\mu\text{m}$ |
| DUT-151int  | 10                       | 12.3                                    | 7.4                                                           | 30.6                                                                         | 0.14                                       | 2.4                             | 199                   | 4                     | 1                         | Cubes, 100 $\mu\text{m}$        |

After the solvothermal reaction the blue precipitates were separated from the reaction solution by centrifugation and washed 6 times with fresh DMF over a period of two days at room temperature. DMF was exchanged with anhydr. acetone by washing 10 times over a period of at least four days. All samples were subjected to an activation procedure involving supercritical  $\text{CO}_2$ , as previously described for DUT-49<sup>8</sup>: In acetone suspended samples were placed on filter frits in a Jumbo Critical Point Dryer 13200J AB (SPI Supplies) which was subsequently filled with liquid  $\text{CO}_2$  (99.995% purity) at 15 °C and 50 bar. To ensure a complete substitution of acetone by  $\text{CO}_2$ , the liquid in the autoclave was exchanged with fresh  $\text{CO}_2$  18 times over a period of 5 days. Temperature and pressure were then raised beyond the supercritical point of  $\text{CO}_2$  (35 °C and 100 bar) and kept until the temperature and pressure were constant at least for 1 h. Supercritical  $\text{CO}_2$  was slowly released over 3 h and the dry powder was transferred and stored in an argon filled glove box. To ensure complete removal of the solvent from the pores (especially from the open metal sites of the Cu-paddle-wheels) additional thermal activation at 120 °C in a Schlenk-tube under dynamic vacuum of  $10^{-4}$  kPa for at least 24 h was performed.



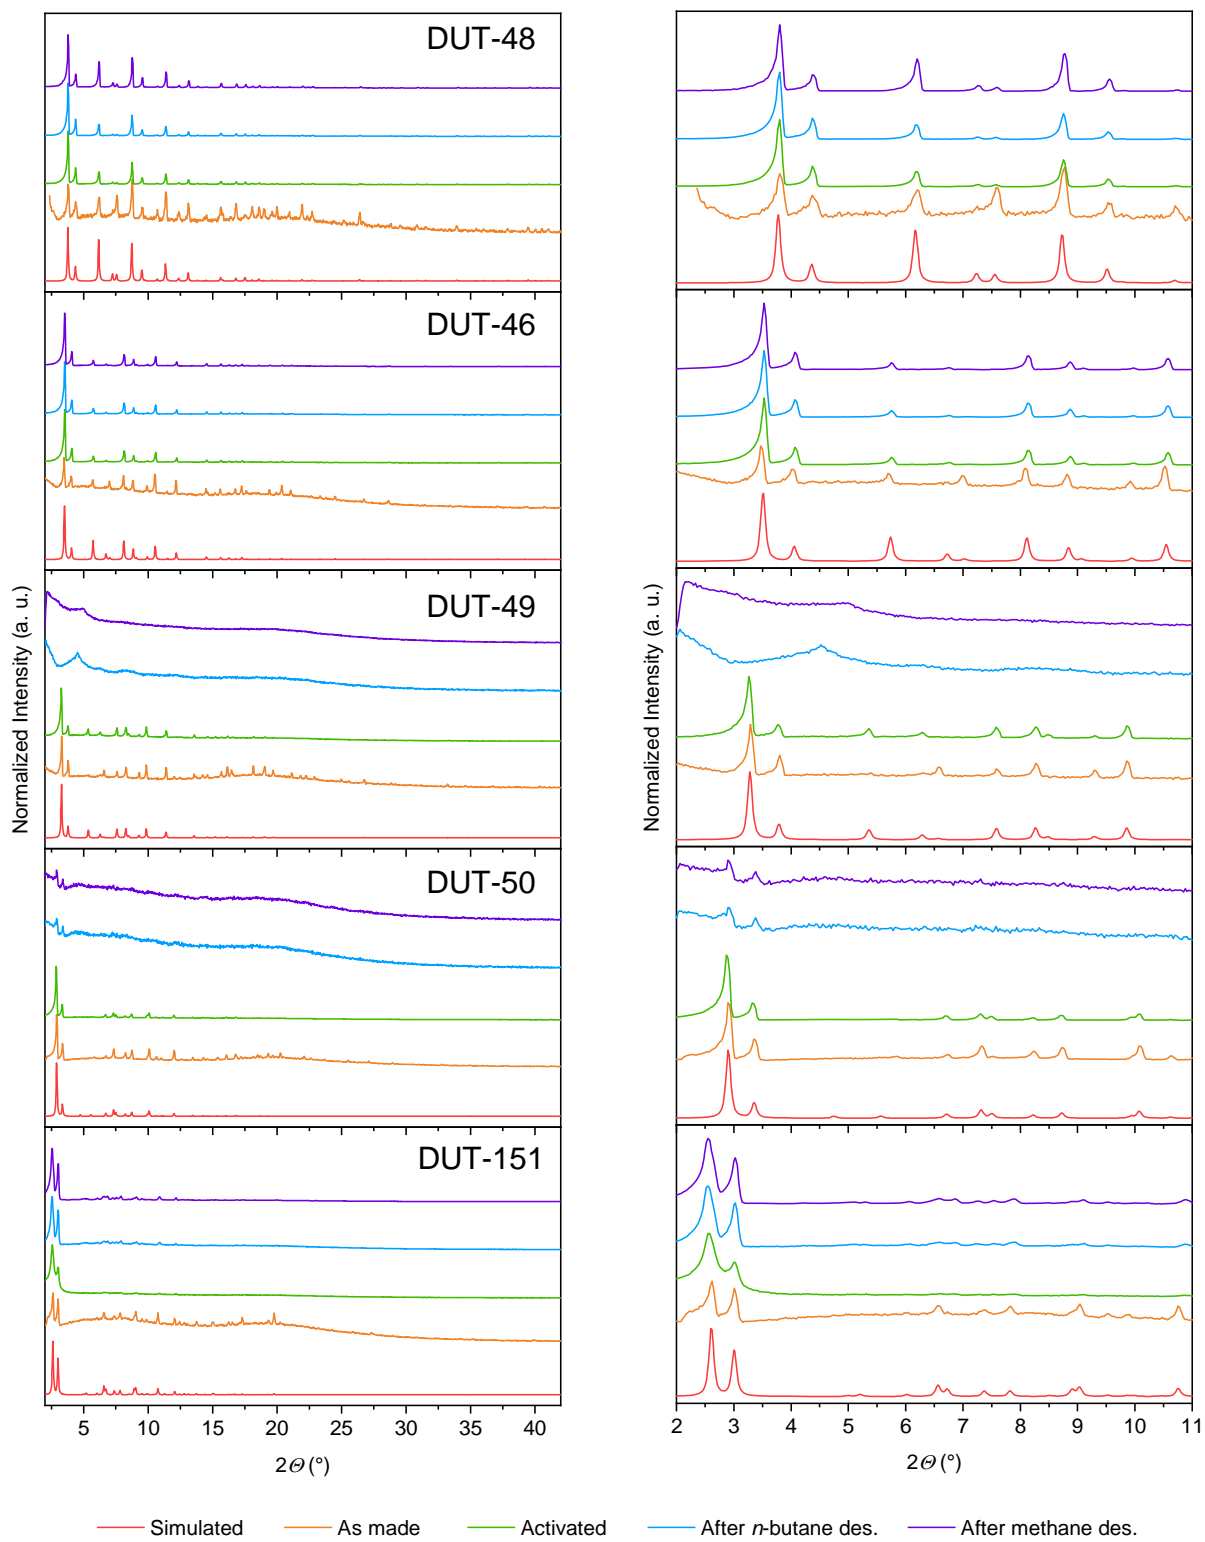

Supplementary Figure 5. PXRD patterns from top to bottom for DUT-48, -46, -49, -50, -151<sub>int</sub>. Left column: wide angle and on the right corresponding magnified regions.

### Supplementary Note 3: Single crystal X-ray diffraction analysis of DUT-46, DUT-50, DUT-151*int*

Blue cubic single crystals of DUT-46, DUT-50 and DUT-151 with dimensions ranging from 30  $\mu\text{m}$  to 80  $\mu\text{m}$  were prepared in a borosilicate glass capillary ( $d = 0.3 \text{ mm}$ ) with small amount of the mother liquor. The capillaries were sealed with wax from both sides in order to avoid the contact with ambient atmosphere. The datasets were collected at BESSY MX BL14.3 beamline of Helmholtz-Zentrum Berlin für Materialien und Energie<sup>9</sup>. Monochromatic X-ray radiation with a wavelength of  $\lambda = 0.089499 \text{ nm}$  ( $E = 13.85 \text{ keV}$ ) was used in experiments. All datasets were collected at room temperature. After short test scans, the crystal symmetry and scan range were determined in each particular case using iMosflm program.<sup>10,11</sup> The  $\varphi$ -scans with oscillation range of  $0.5^\circ$  were used for data collection. In the case of cubic structures of DUT-46 and DUT-50, 100 images were collected to reach the maximal completeness. For DUT-151, crystallizing in *C*-centered monoclinic lattice, 240 images were required. Further the datasets were processed automatically using XDSAPP 2.0 software.<sup>12</sup> Crystal structures were solved by direct methods and refined by full matrix least-squares on  $F^2$  using SHELX-2016/4 program package.<sup>13,14</sup> All non-hydrogen atoms were refined in anisotropic approximation. Hydrogen atoms were refined in geometrically calculated positions using “riding model” with  $U_{iso}(H)=1.2U_{iso}(C)$ . Since the symmetry of the naphthalene core in DUT-46 is incompatible with the symmetry of its position in the unit cell, the molecular fragment was refined disordered over four symmetrically dependent positions. In the case of DUT-50, the disorder of both symmetrically independent phenyl rings was treated by splitting over two equally occupied positions. The lower symmetry of DUT-151*int*, with four symmetrically independent paddle wheels in the asymmetric unit prompted us to use the AFIX 66, SIMU and DELU instructions in order to constrain the geometry and anisotropic displacement parameters of all phenyl rings in the structure. The large pores, high crystal symmetry and high measurement temperature did not allow refining the disordered solvent molecules within the pores of the frameworks, therefore, SQUEEZE routine in PLATON was used to generate the reflection intensities with subtracted solvent contribution.<sup>15</sup> CCDC-1889257, 1889255 and 1889256 contain the supplementary crystallographic data for DUT-46, DUT-50 and DUT-151*int*, correspondingly. These data can be obtained free of charge from the Cambridge Crystallographic Data Centre via [www.ccdc.cam.ac.uk/data\\_request/cif](http://www.ccdc.cam.ac.uk/data_request/cif).

Supplementary Table 4. Single crystal data of DUT-46, DUT-50 and DUT-151int

|                                             | DUT-46                                                                         | DUT-50                                                                         | DUT-151int                                                                     |
|---------------------------------------------|--------------------------------------------------------------------------------|--------------------------------------------------------------------------------|--------------------------------------------------------------------------------|
| Empirical formula                           | C <sub>38</sub> H <sub>18</sub> O <sub>10</sub> N <sub>2</sub> Cu <sub>2</sub> | C <sub>46</sub> H <sub>24</sub> O <sub>10</sub> N <sub>2</sub> Cu <sub>2</sub> | C <sub>52</sub> H <sub>28</sub> O <sub>10</sub> N <sub>2</sub> Cu <sub>2</sub> |
| Formula weight                              | 789.66                                                                         | 891.75                                                                         | 967.84                                                                         |
| Crystal system, space group                 | cubic, $Fm\bar{3}m$                                                            | cubic, $Fm\bar{3}m$                                                            | monoclinic, $C2/m$                                                             |
| Unit cell dimensions, Å or deg              | $a = 43.550(5)$                                                                | $a = 52.630(6)$                                                                | $a = 71.700(14)$<br>$b = 41.570(8)$<br>$c = 41.450(8)$<br>$\beta = 125.08(3)$  |
| Unit cell volume, Å <sup>3</sup>            | 82597(28)                                                                      | 145781(51)                                                                     | 101103(46)                                                                     |
| Z                                           | 24                                                                             | 24                                                                             | 24                                                                             |
| Calculated density, g cm <sup>-3</sup>      | 0.381                                                                          | 0.244                                                                          | 0.382                                                                          |
| Absorption coefficient, 1/mm                | 0.604                                                                          | 0.345                                                                          | 0.500                                                                          |
| F(000)                                      | 9536 (after SQUEEZE)                                                           | 10848 (after SQUEEZE)                                                          | 11808 (after SQUEEZE)                                                          |
| θ range, °                                  | 1.02 – 37.08                                                                   | 0.84 – 25.48                                                                   | 0.76 – 33.99                                                                   |
|                                             | -32 ≤ h ≤ 56                                                                   | -47 ≤ h ≤ 49                                                                   | -88 ≤ h ≤ 25                                                                   |
| Limiting indices                            | -51 ≤ k ≤ 55                                                                   | -50 ≤ k ≤ 45                                                                   | -31 ≤ k ≤ 51                                                                   |
|                                             | -58 ≤ l ≤ 17                                                                   | -48 ≤ l ≤ 19                                                                   | -46 ≤ l ≤ 51                                                                   |
| Reflections collected / unique              | 52664 / 4900                                                                   | 34672 / 3320                                                                   | 100606 / 71100                                                                 |
| R(int)                                      | 0.0501                                                                         | 0.1122                                                                         | 0.0565                                                                         |
| Data / parameters                           | 4900 / 102                                                                     | 3320 / 110                                                                     | 71100 / 1574                                                                   |
| Goof on F <sup>2</sup>                      | 1.621                                                                          | 1.111                                                                          | 1.034                                                                          |
| Final R indices [I>2σ(I)]                   | $R_1 = 0.0587$<br>$wR_2 = 0.1948$                                              | $R_1 = 0.0597$<br>$wR_2 = 0.1864$                                              | $R_1 = 0.0622$<br>$wR_2 = 0.1693$                                              |
| R indices (all data)                        | $R_1 = 0.0804$<br>$wR_2 = 0.2198$                                              | $R_1 = 0.0963$<br>$wR_2 = 0.2267$                                              | $R_1 = 0.1018$<br>$wR_2 = 0.1942$                                              |
| Largest diff. peak / hole, eÅ <sup>-3</sup> | 0.52 / -0.35                                                                   | 0.47 / -0.36                                                                   | 0.37 / -0.30                                                                   |

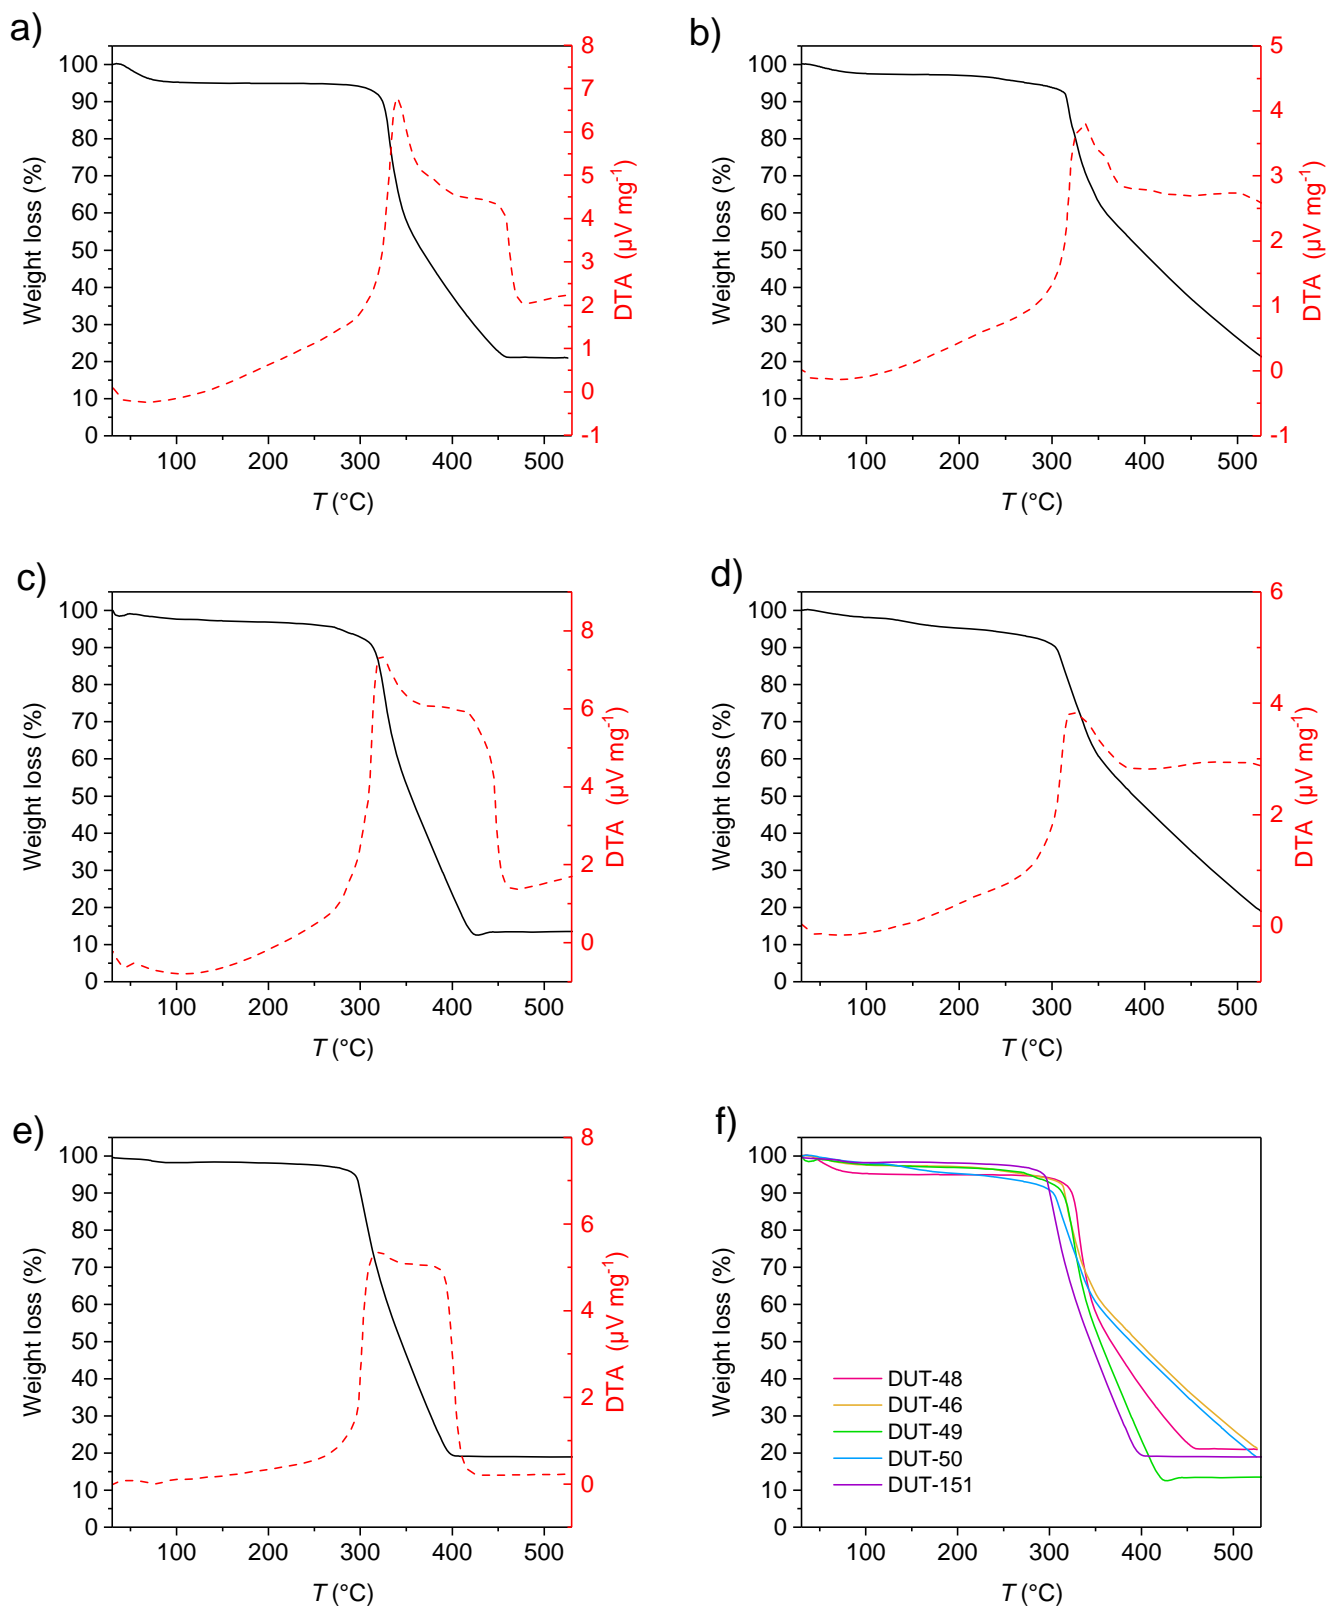

Supplementary Figure 6. Thermogravimetric analysis of a) DUT-48, b) DUT-46, c) DUT-49, d) DUT-50, e) DUT-151<sub>int</sub> and f) comparison of all materials.

Supplementary Table 5. CHN elemental analysis for activated MOFs.

| Material ID        | Calculated (%) |      |      | Experimental (%) |       |      |
|--------------------|----------------|------|------|------------------|-------|------|
|                    | C              | H    | N    | C                | H     | N    |
| DUT-46             | 60.24          | 2.39 | 3.7  | 59.06            | 2.33  | 3.81 |
| DUT-48             | 57.71          | 2.28 | 3.96 | 56.99            | 2.403 | 3.98 |
| DUT-49             | 61.3           | 2.57 | 3.57 | 59.85            | 2.542 | 3.64 |
| DUT-50             | 64.26          | 2.81 | 3.26 | 62.82            | 3.549 | 3.45 |
| DUT-151 <i>int</i> | 66.73          | 3.02 | 2.99 | 66.58            | 3.077 | 3.37 |

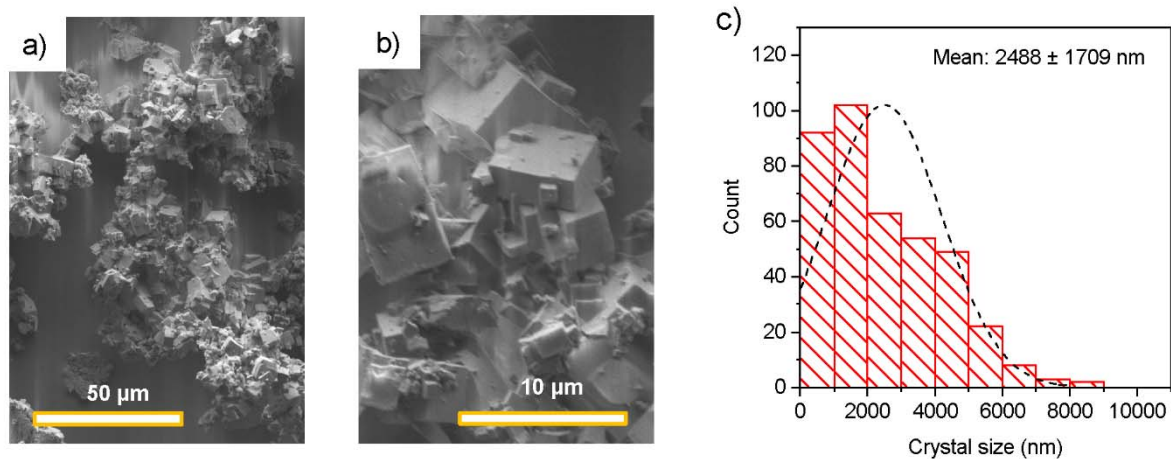

Supplementary Figure 7. a-b) Scanning electron microscopy images of DUT-48, scale bar a) 50 μm, b) 10 μm. c) Experimental crystal size distribution (red histogram) and distribution curve (black dashed line).

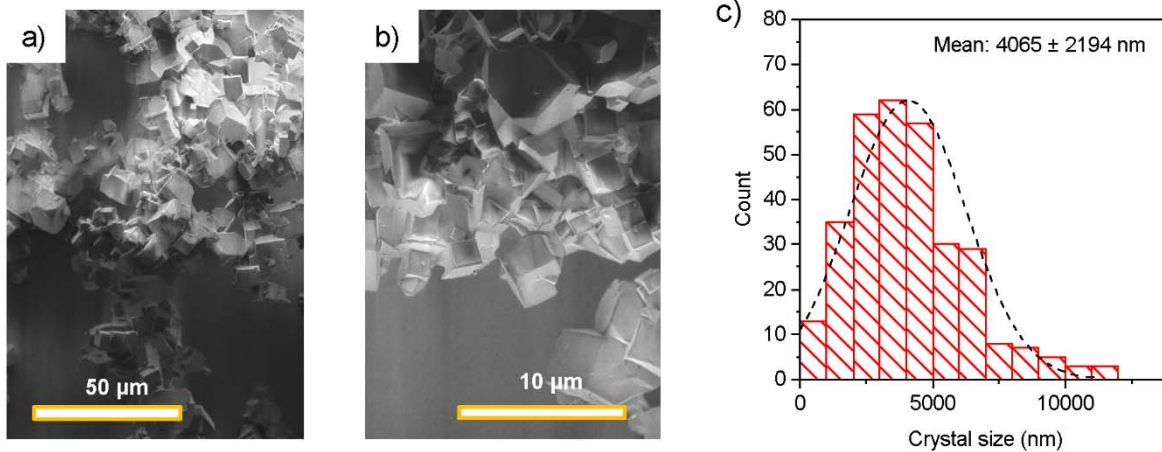

Supplementary Figure 8. a-b) Scanning electron microscopy images of DUT-46, scale bar a) 50 μm, b) 10 μm. c) Experimental crystal size distribution (red histogram) and distribution curve (black dashed line).

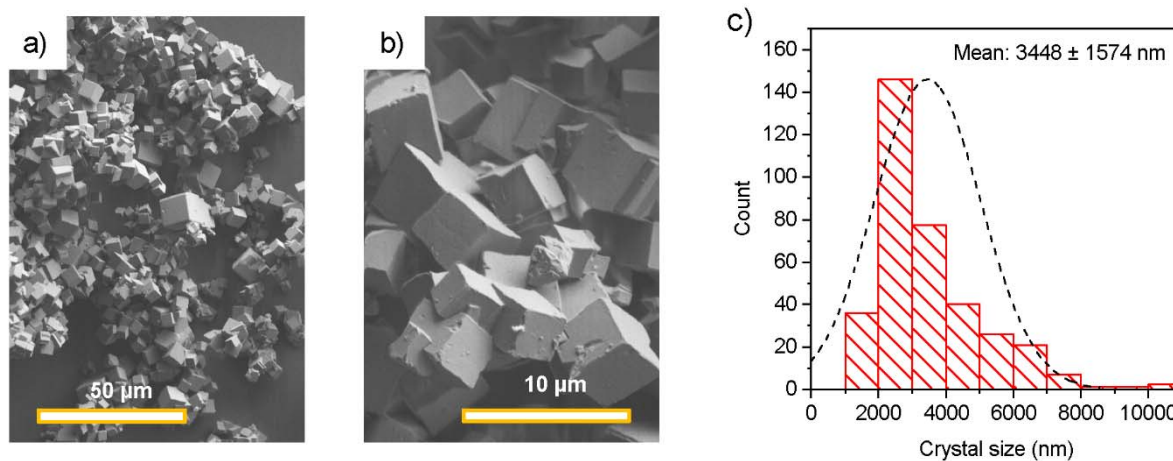

Supplementary Figure 9. a-b) Scanning electron microscopy images of DUT-49, scale bar a) 50 μm, b) 10 μm. c) Experimental crystal size distribution (red histogram) and distribution curve (black dashed line).

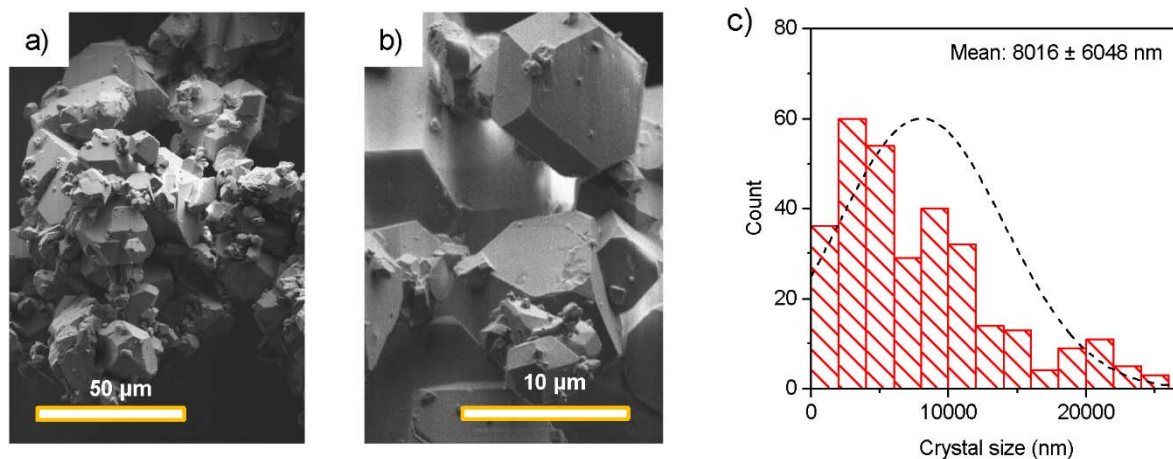

Supplementary Figure 10. a-b) Scanning electron microscopy images of DUT-50, scale bar a) 50 μm, b) 10 μm. c) Experimental crystal size distribution (red histogram) and distribution curve (black dashed line).

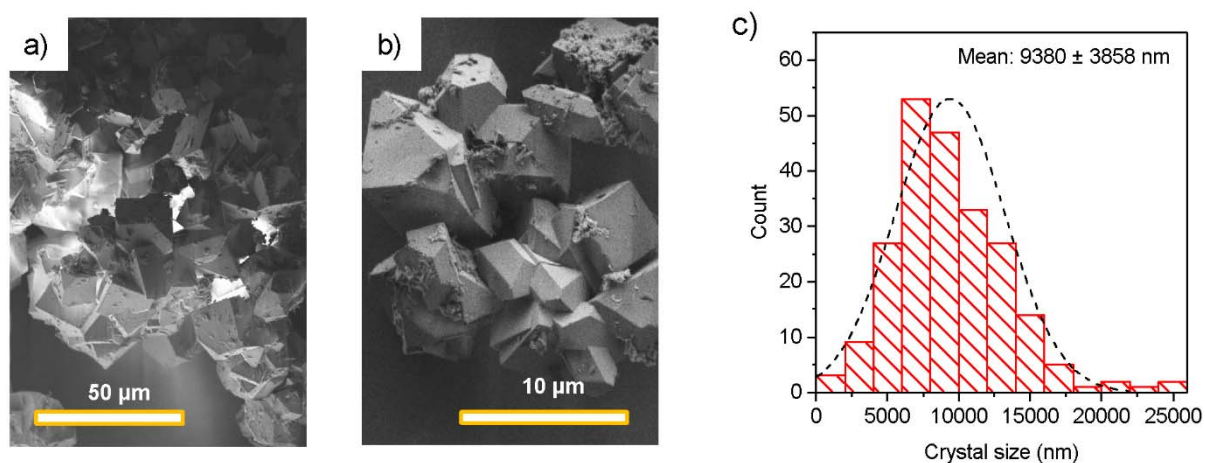

Supplementary Figure 11. a-b) Scanning electron microscopy images of DUT-151int, scale bar a) 50 μm, b) 10 μm. c) Experimental crystal size distribution (red histogram) and distribution curve (black dashed line).

Supplementary Table 6. Crystal size distribution extracted from SEM analysis.

| Material ID | Mean crystal size (nm) | Standard deviation (nm) | Relative standard deviation (%) |
|-------------|------------------------|-------------------------|---------------------------------|
| DUT-48      | 2488                   | 1709                    | 68.7                            |
| DUT-46      | 4065                   | 2194                    | 53.9                            |
| DUT-49      | 3488                   | 1574                    | 45.1                            |
| DUT-50      | 8016                   | 6048                    | 75.4                            |
| DUT-151int  | 9380                   | 3858                    | 41.1                            |

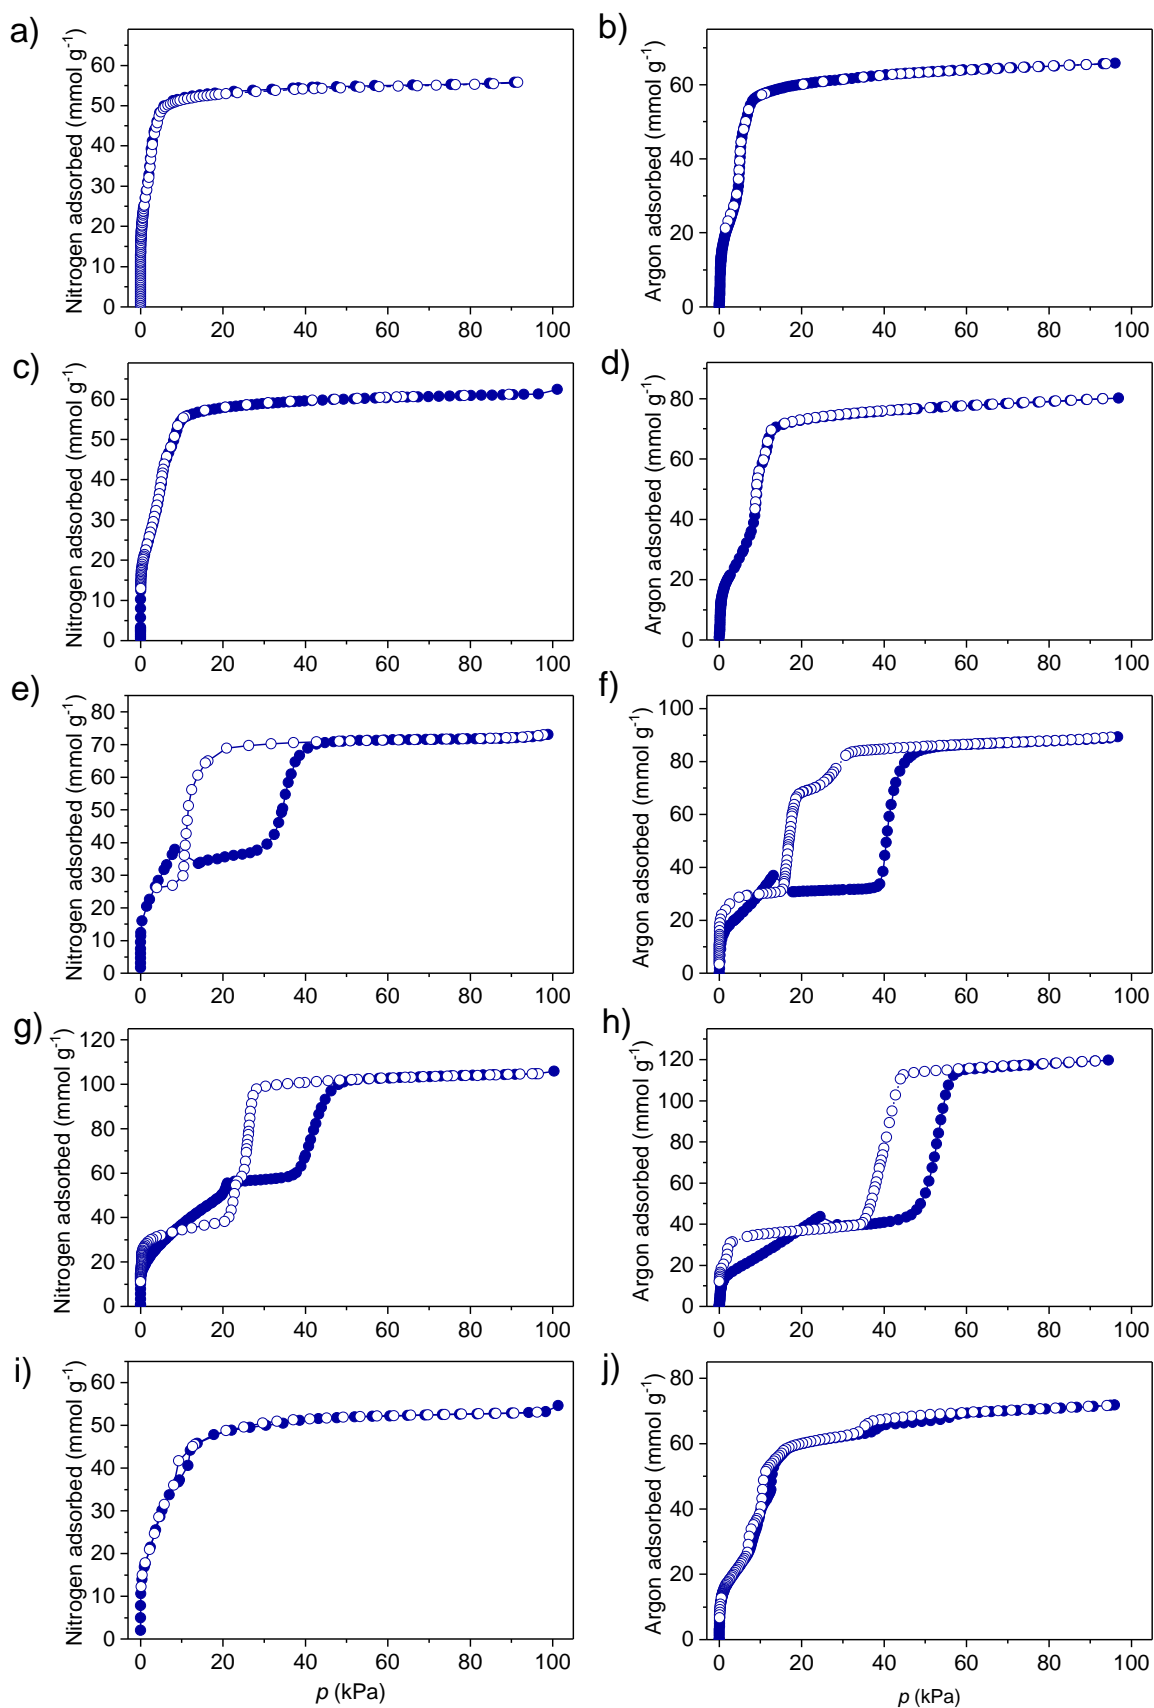

Supplementary Figure 12. Nitrogen at 77 K (left) and argon at 87 K (right) physisorption isotherms of DUT-48 (a,b), DUT-46 (c,d), DUT-49 (e,f), DUT-50 (g,h), DUT-151 (i,j). Filled symbols: adsorption, empty symbols: desorption.



#### Supplementary Note 4: Textural analysis of microcrystalline MOF powders

Textural properties, such as geometric surface area, pore volume and pore size distributions (PSD), were calculated for these structures using the Zeo++ code<sup>16</sup> on the basis of disorder-free simulated crystal structures for *op* phases and *in silico* determined crystal structures for the corresponding *cp* phases for DUT-48, -151, and experimental DUT-151*int* structure. The obtained results were compared to experimentally obtained values derived from nitrogen and argon adsorption isotherms at 77 K and 87 K, respectively.

Supplementary Table 7. Comparison of experimental and geometrical surface area and pore volumes.

| Material ID        | Pore Volume (N <sub>2</sub> ads.) (cm <sup>3</sup> g <sup>-1</sup> ) | Pore Volume (Ar ads.) (cm <sup>3</sup> g <sup>-1</sup> ) | Geometric surface area (m <sup>2</sup> g <sup>-1</sup> ) | Geometric pore volume (cm <sup>3</sup> g <sup>-1</sup> ) | Framework density (g cm <sup>-3</sup> ) |
|--------------------|----------------------------------------------------------------------|----------------------------------------------------------|----------------------------------------------------------|----------------------------------------------------------|-----------------------------------------|
| DUT-48             | 1.98                                                                 | 1.88                                                     | 4394                                                     | 1.67                                                     | 0.424                                   |
| DUT-46             | 2.15                                                                 | 2.29                                                     | 4736                                                     | 1.89                                                     | 0.365                                   |
| DUT-49             | 2.73                                                                 | 2.81                                                     | 5065                                                     | 2.64                                                     | 0.306                                   |
| DUT-50             | 3.52                                                                 | 3.41                                                     | 5386                                                     | 3.45                                                     | 0.235                                   |
| DUT-151 <i>int</i> | 1.95                                                                 | 2.05                                                     | 4688                                                     | 1.81                                                     | 0.368                                   |
| DUT-151            | n. a.                                                                | n. a.                                                    | 5672                                                     | 4.43                                                     | 0.183                                   |

In general, geometric values for pore volume and surface area are expected to be inferior to experimental values. From the experimental adsorption data, accurate determination of specific surface areas for the investigated materials was not possible by using the BET method fulfilling all consistency criteria recently defined for the analysis of mesoporous MOFs<sup>17</sup>. Several linear regions in the BET-plot were analysed and although all of them exhibit a good correlation coefficient only a few of them (marked red in Supplementary Table 7) were found to fulfil all consistency criteria recommended for determination of specific surface area by the BET method. Mostly, the third criterion is not fulfilled: the relative pressure value ( $p/p_0$ ) corresponding to the monolayer capacity ( $n_m$ ) should be located within the selected BET range.

Only for DUT-151*int* a specific BET surface area in the range of the geometric surface area determined from the guest-free crystal structures was obtained. This might be due to the smaller pore size and microporous nature of DUT-151*int* in contrast to the mesoporous character of the other materials in this series. The only surface area observed to be within the selection criteria for DUT-50 is found to be drastically lower than the geometric surface area<sup>18</sup>. Due to the observed disagreement of experimental and simulated surface area, only the geometric surface area is considered for the following discussions.

Supplementary Table 8. BET analysis of argon adsorption isotherms of DUT-46, -48, -50, and DUT-151. Values printed in bold fulfill selection criteria for accurate experimental determination of specific surface area by the BET method.

| Material ID            | Relative pressure range | Slope    | Intercept | Correlation coefficient $R^2$ | BET constant, $C$ | $n_m$ (mol g <sup>-1</sup> ) | $p/p_0$      | BET surface area (m <sup>2</sup> g <sup>-1</sup> ) |
|------------------------|-------------------------|----------|-----------|-------------------------------|-------------------|------------------------------|--------------|----------------------------------------------------|
| DUT-48                 | 0.007519 – 0.0112       | 1.05205  | 0.00425   | 0.9994                        | 248               | 0.0236                       | 0.059        | 2026                                               |
|                        | 0.01718 – 0.02553       | 0.83839  | 0.00715   | 0.9994                        | 118               | 0.0296                       | 0.084        | 2531                                               |
|                        | 0.02854 – 0.03448       | 0.61778  | 0.01301   | 0.9989                        | 49                | 0.0397                       | 0.126        | 3393                                               |
|                        | 0.03587 – 0.03981       | 0.4329   | 0.0195    | 0.9986                        | 23                | 0.0553                       | 0.172        | 4731                                               |
|                        | 0.05707 – 0.06591       | 0.3001   | 0.0152    | 0.9999                        | 20                | 0.0799                       | 0.180        | 6791                                               |
| DUT-46                 | 0.009669 – 0.0234       | 0.9980   | 0.005699  | 0.9998                        | 176               | 0.0249                       | 0.070        | 2133                                               |
|                        | 0.02528 – 0.04116       | 0.780784 | 0.010995  | 0.9992                        | 72                | 0.0316                       | 0.110        | 2704                                               |
|                        | 0.09791 – 0.10996       | 0.2319   | 0.0257    | 0.9999                        | 10                | 0.0971                       | 0.240        | 8310                                               |
| DUT-151 <sub>int</sub> | 0.00019 – 0.00709       | 1.5573   | 0.0027    | 0.9999                        | 578               | 0.016                        | 0.040        | 1372                                               |
|                        | 0.00981 – 0.0244        | 1.1950   | 0.0060    | 0.9995                        | 201               | 0.020                        | 0.066        | 1782                                               |
|                        | 0.00272 – 0.0419        | 0.9522   | 0.0122    | 0.9991                        | 79                | 0.0259                       | 0.101        | 2219                                               |
|                        | 0.0448 – 0.0635         | 0.7228   | 0.0222    | 0.9983                        | 34                | 0.0336                       | 0.147        | 2873                                               |
|                        | 0.104 – 0.115           | 0.4004   | 0.02971   | 0.9998                        | 15                | 0.058                        | 0.208        | 4977                                               |
|                        | <b>0.14 – 0.164</b>     | 0.4279   | 0.01423   | 0.9999                        | 31                | 0.0566                       | <b>0.152</b> | <b>4841</b>                                        |
| DUT-50                 | 0.00432 – 0.00639       | 1.1761   | 0.00703   | 0.9991                        | 168               | 0.0211                       | 0.072        | 1809                                               |
|                        | 0.00695 – 0.0112        | 1.5407   | 0.0048    | 0.9994                        | 321               | 0.0169                       | 0.053        | 1385                                               |
|                        | 0.0655 – 0.108          | 0.776    | 0.0341    | 0.9976                        | 23                | 0.0309                       | 0.170        | 2642                                               |
|                        | 0.119 – 0.17            | 0.5368   | 0.06909   | 0.9986                        | 9.8               | 0.0419                       | 0.240        | 3581                                               |
|                        | <b>0.0182 – 0.245</b>   | 0.4553   | 0.07436   | 0.9999                        | 62                | 0.0541                       | <b>0.113</b> | <b>4626</b>                                        |

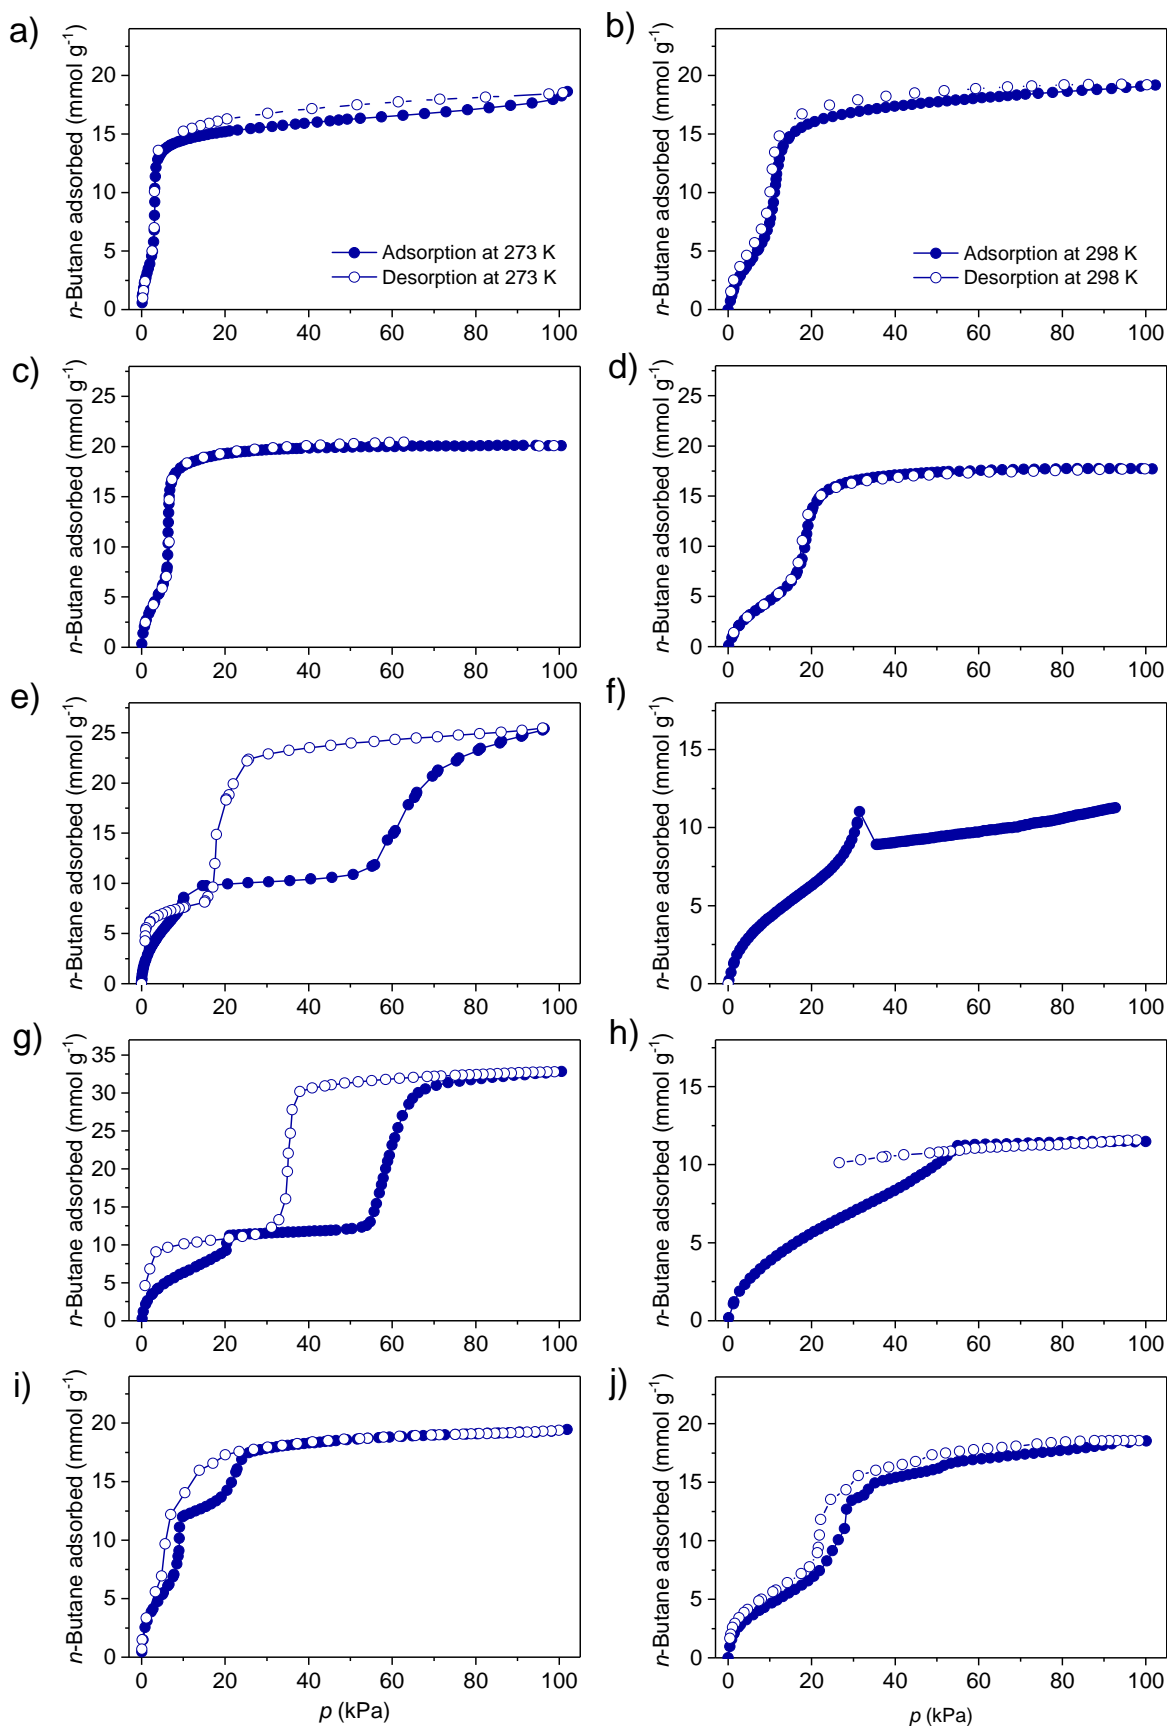

Supplementary Figure 13. *n*-Butane adsorption isotherms at 273 K (left) and 298 K (right) of DUT-48 (a,b), DUT-46 (c,d), DUT-49 (e,f), DUT-50 (g,h), DUT-151 (i,j). Filled symbols: adsorption, empty symbols: desorption.

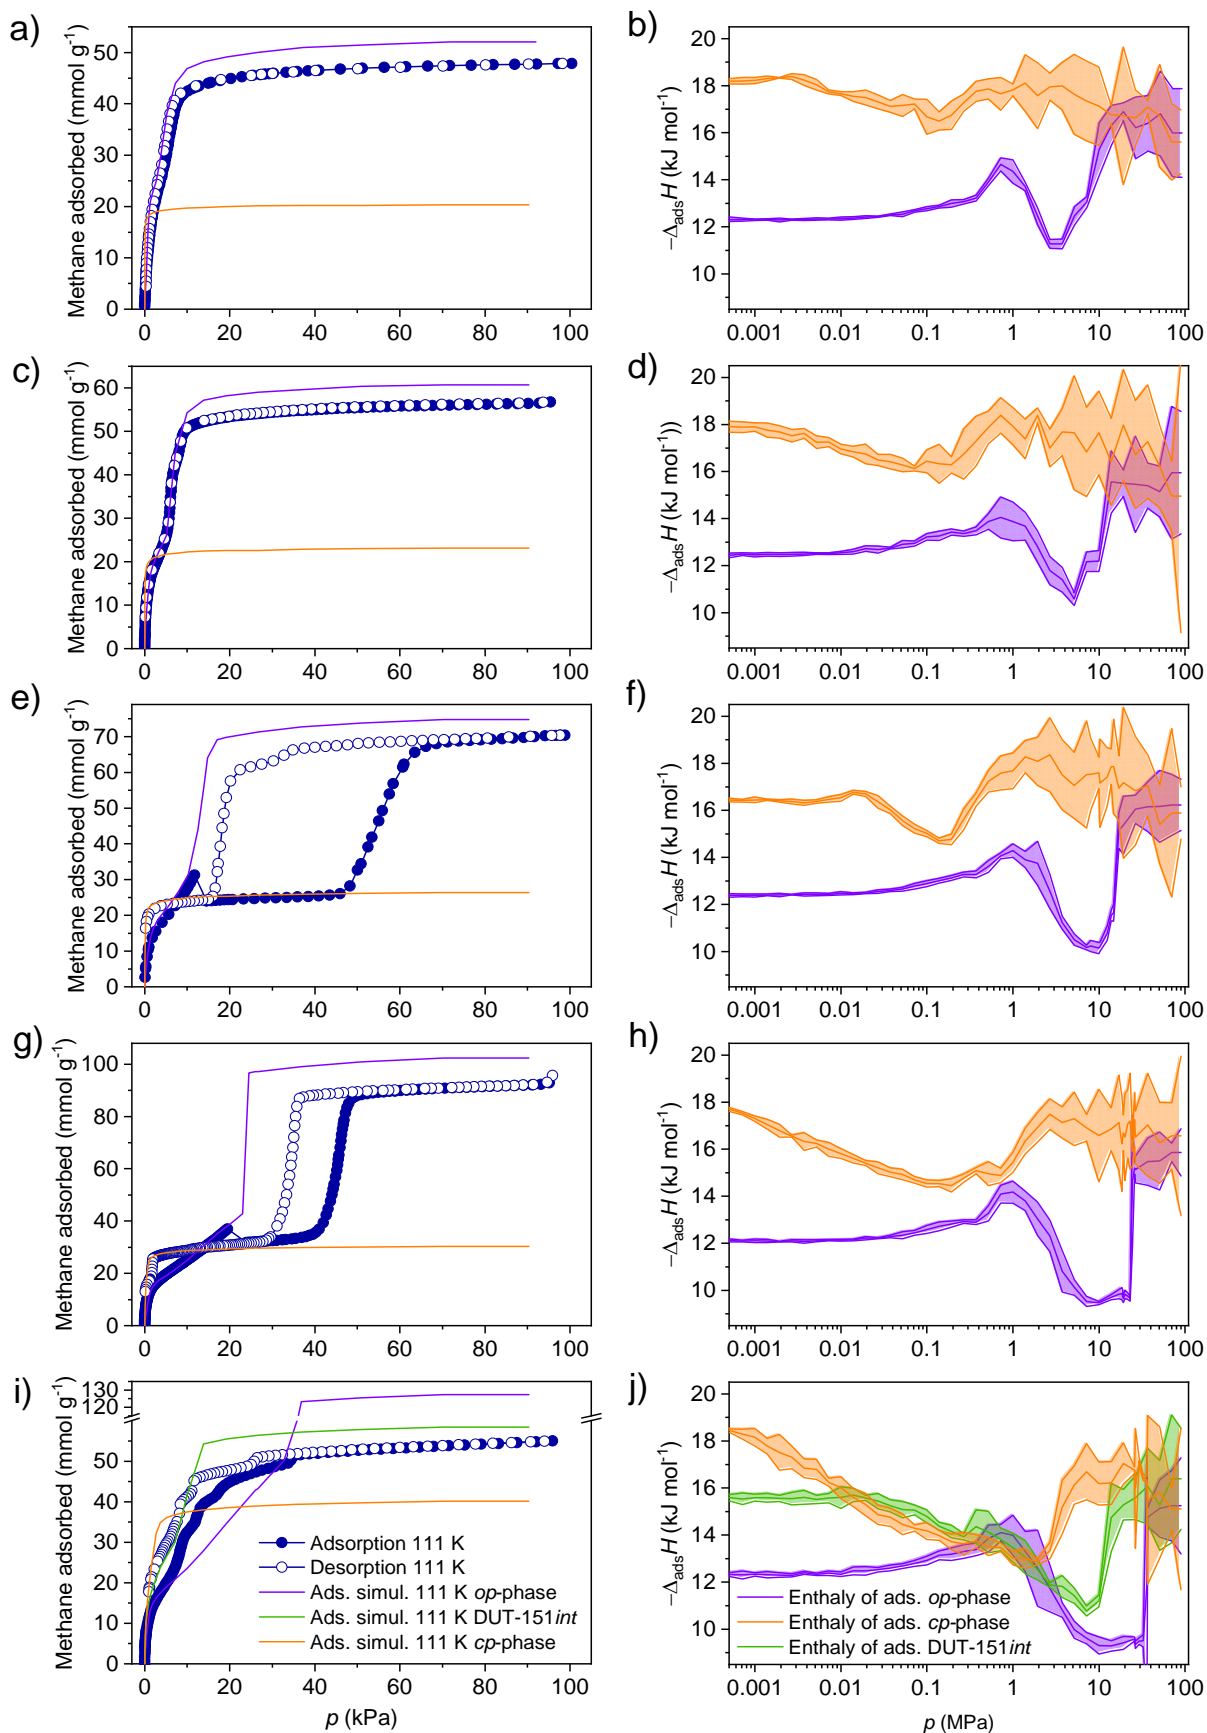

Supplementary Figure 14. Methane isotherms at 111 K and corresponding simulated enthalpy profile of corresponding *op* and *cp* phases for DUT-48 (a,b), DUT-46 (c,d), DUT-49 (e,f), DUT-50 (g,h), and DUT-151 (i,j). Filled symbols: adsorption, empty symbols: desorption.

Supplementary Table 9. NGA parameters for DUT-49 and DUT-50.

| Gas              | $T$ (K) | DUT-49                                           |                          | DUT-50                                           |                          |
|------------------|---------|--------------------------------------------------|--------------------------|--------------------------------------------------|--------------------------|
|                  |         | $\Delta n_{\text{NGA}}$ (mmol g <sup>-1</sup> )* | $p_{\text{Trans}}$ (kPa) | $\Delta n_{\text{NGA}}$ (mmol g <sup>-1</sup> )* | $p_{\text{Trans}}$ (kPa) |
| Nitrogen         | 77      | 4.41                                             | 8.32                     | 0                                                | 21.14                    |
| Argon            | 87      | 6.13 (+0.02)                                     | 13.12                    | 4.03 (+0.02)                                     | 24.5                     |
| Methane          | 111     | 7.24 (+0.05)                                     | 11.72                    | 5.17 (+0.03)                                     | 19.52                    |
| <i>n</i> -Butane | 298     | 1.89 (+0.05)                                     | 31.46                    | 0                                                | 54.98                    |
| <i>n</i> -Butane | 303     | 0.74 (+0.5)                                      | 38.21                    | 0.14 (+0.5)                                      | 65.2                     |

\*The accuracy of determination of  $\Delta n_{\text{NGA}}$  depends on the resolution of the isotherm. The errors provided in Supplementary Table 9 represent the step size and give an indication of what the maximum  $\Delta n_{\text{NGA}}$  could be for higher resolution isotherm.

### Supplementary Note 5: Adsorption microcalorimetry analysis of microcrystalline MOF powders

For microcalorimetry, all isotherms and enthalpies were measured experimentally using a Tian-Calvet type microcalorimeter coupled with a home-made manometric gas dosing system<sup>19</sup>. This apparatus allows the simultaneous measurement of the adsorption isotherm and the corresponding differential enthalpies. Gas is introduced into the system using a step-by-step method and each dose is allowed to stabilize in a reference volume before being brought into contact with the adsorbent located in the microcalorimeter. The introduction of the adsorbate to the sample is accompanied by an exothermic thermal signal, measured by the thermopiles of the microcalorimeter. The peak in the calorimetric signal is integrated over time to give the total energy released during this adsorption step. Around 0.05 g of sample is used in each experiment. For each injection of gas, equilibrium was assumed to have been reached after 130 minutes. This was confirmed by the return of the calorimetric signal to its baseline (< 5  $\mu\text{W}$ ). The gases used for the adsorption experiment were obtained from Air Liquide and were of minimum N47 quality (99.997 % purity).

To obtain the experimental errors, the procedure described in the *Guide to the Expression of Uncertainty in Measurement* was used. The quantity, enthalpy or pressure, is first expressed as a function  $f(y)$  of other physical measured quantities. The standard uncertainty ( $u_c(y)$ ) is then calculated on the basis of, where  $u_i(x_i)$  is the standard uncertainty in each input quantity. Here it is assumed that the input quantities are independent and uncorrelated. The error margins ( $a_i$ ) for each quantity were taken from manufacturer specifications of the equipment used for recording. They were then divided by a value  $k_i$  chosen to cover the expected variance in that quantity, as each variable is assumed to be characterized by a probability distribution. The error introduced by the equation of state used (NIST REFPROP<sup>20</sup>) were assumed to be minor compared to the error introduced by the physical quantities, with the same to be said regarding the error in the calorimetric heat signal, which represents less than 1% of the error in enthalpy. Finally, the expanded uncertainty was calculated by choosing a suitable coverage factor of 1.645, corresponding to a 95% confidence interval.

$$f(y) = f(N_1, N_2 \dots N_i) \quad (1)$$

$$u_c(y) = \sqrt{\sum_{i=1}^N \left( \frac{\partial f(y)}{\partial x_i} \times u_i(x_i) \right)^2} \quad (2)$$

Supplementary Table 10. Parameters used to estimate the errors of *in situ* calorimetric analysis.

| Variable ( $i$ )                          | $a_i$              | $k_i$      |
|-------------------------------------------|--------------------|------------|
| Pressure, $p$ (Pa)                        | 20                 | $\sqrt{3}$ |
| Temperature, $T$ (K)                      | 0.1                | 3          |
| Sample mass, $m$ (g)                      | $1 \times 10^{-4}$ | $\sqrt{3}$ |
| Reference volume, $V_r$ (m <sup>3</sup> ) | $1 \times 10^{-9}$ | $\sqrt{6}$ |
| Cell volume, $V_c$ (m <sup>3</sup> )      | $6 \times 10^{-7}$ | $\sqrt{6}$ |

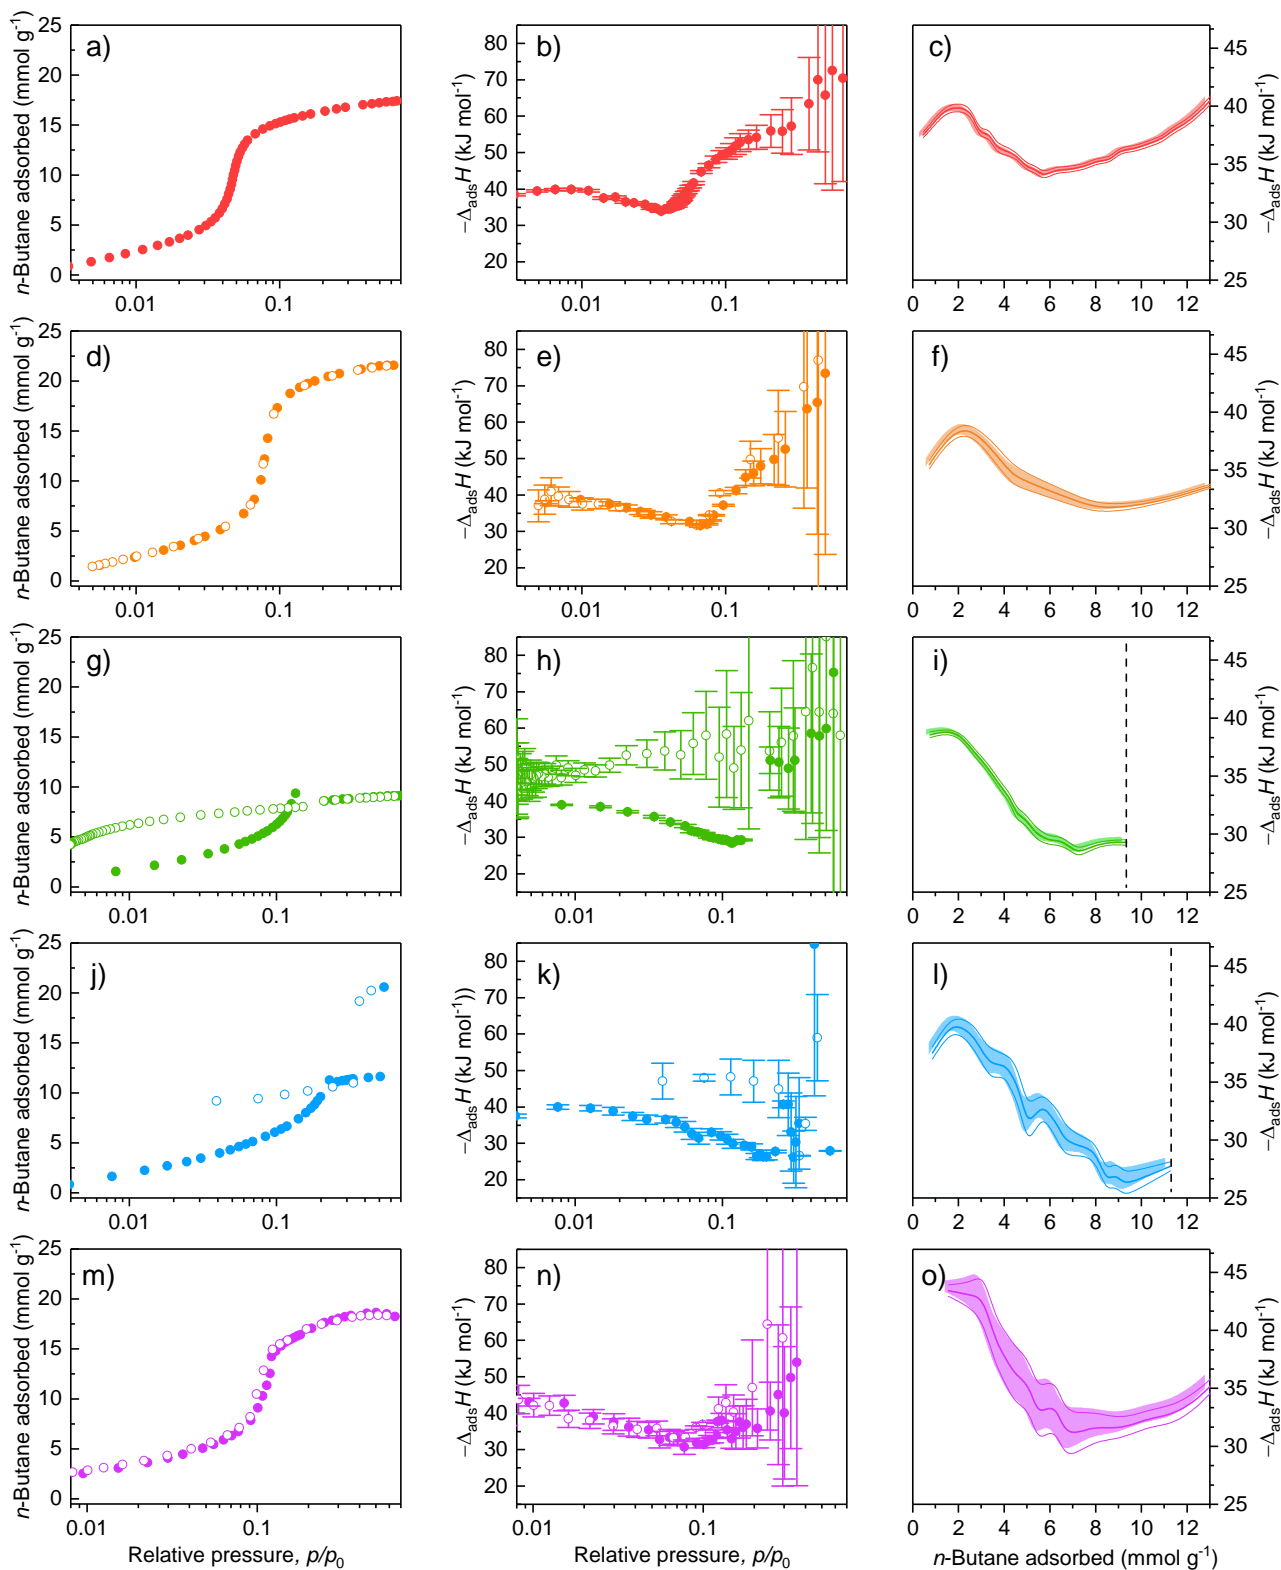

Supplementary Figure 15. Adsorption (filled symbol) and desorption (empty symbol) isotherm of *n*-butane at 303 K (left), corresponding adsorption/desorption enthalpies and error bars (middle), and isosteric adsorption enthalpy profiles with semi-transparent error region (right) of a-c) DUT-48, d-f) DUT-46, g-i) DUT-49, j-l) DUT-50, m-o) DUT-151<sub>int</sub>. Dashed lines in i) and l) indicate NGA transition and enthalpies beyond this loading were removed for clarity.

In DUT-46 and DUT-151*int* small hystereses were observed in the enthalpy profile. In the case of DUT-151*int* this can be correlated to a structural transition analysed by in situ PXRD and reflected by a hysteresis in the adsorption isotherm. No hysteresis in the adsorption/desorption isotherms and no structural transition can be observed in the pressure range in which a hysteresis is observed in the enthalpy profile.

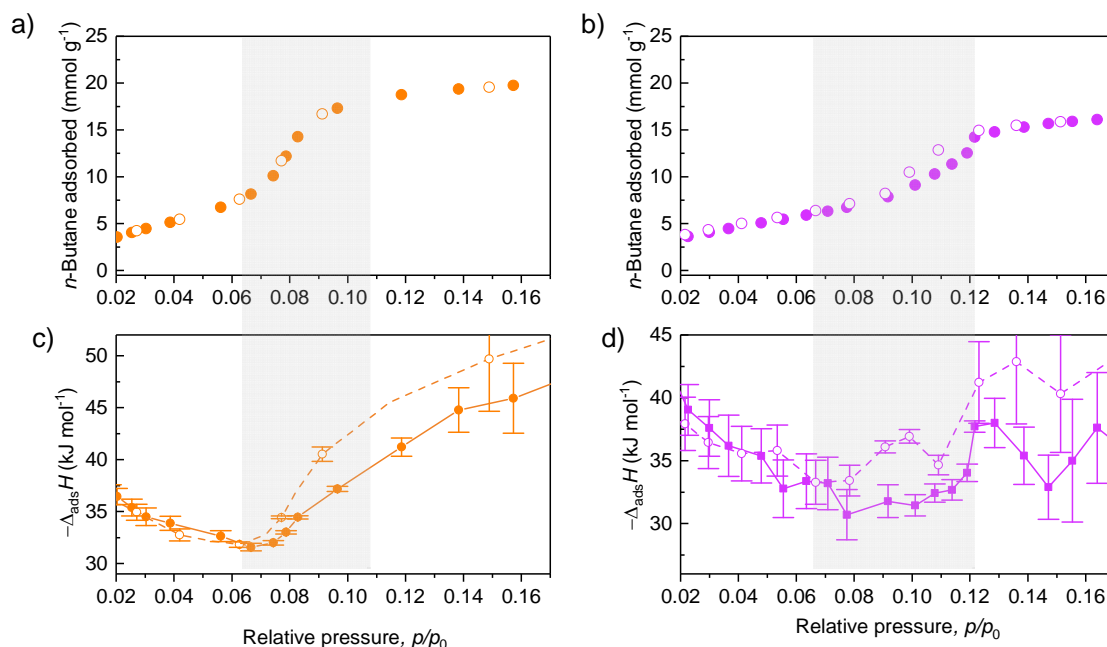

Supplementary Figure 16. Adsorption (filled symbol) and desorption (empty symbol) isotherm of *n*-butane at 303 K for a) DUT-46 and b) DUT-151*int* with corresponding adsorption/desorption enthalpies and error bars for c) DUT-46 and d) DUT-151*int*. Grey regions indicate hysteresis in enthalpy profiles.



## Supplementary Note 6: Mercury intrusion porosimetry analysis of microcrystalline MOF powders

Mercury intrusion is a method frequently applied to investigate the mechanical properties and structural contraction of metal organic frameworks.<sup>21-26</sup> To begin with, the solids were activated at 115°C for 8 h in secondary vacuum. The obtained powder was then loaded into a powder penetrometer of 3.1126 cm<sup>3</sup> volume with a stem volume of 0.412 cm<sup>3</sup> using a glove box (Jacomex P-BOX) under argon atmosphere H<sub>2</sub>O < 5 ppm. The mercury intrusion experiments were carried out using a Micromeritics AutoPore IV 9500 allowing a range of pressure applied from 0.003 to 300 MPa. Prior to the experiment the powder was outgassed in vacuum at ~6.5 Pa for 15 minutes. The collected volume of mercury intruded was corrected by a blank measurement recorded under the same conditions (temperature and pressure) using the same penetrometer to obtain the absolute contracted volume as a function of the pressure reported in Supplementary Figure 17. The resulting volume change upon structural contraction can be determined from the cumulative volume of mercury intruded obtained by mercury intrusion using equation (3):

$$V_{cp} = V_{op} - \frac{Z \times M \times (V_{final} - V_{initial}) \times 10^{24}}{N_A} \quad (3)$$

where  $V_{cp}$  and  $V_{op}$  are the volumes of the contracted and open phases respectively in Å<sup>3</sup>,  $Z$  the number of formula units per unit cell (in the case of the investigated materials  $Z = 24$ ),  $M$  is the molar mass of a formula unit in g mol<sup>-1</sup> derived from the crystal structure,  $V_{final}$  and  $V_{initial}$  the cumulative volumes of mercury intruded at the end (last point of the second plateau) and at the beginning of the transition (end of the first plateau) in ml g<sup>-1</sup> and  $N_A$  is Avogadro's constant in mol<sup>-1</sup>.

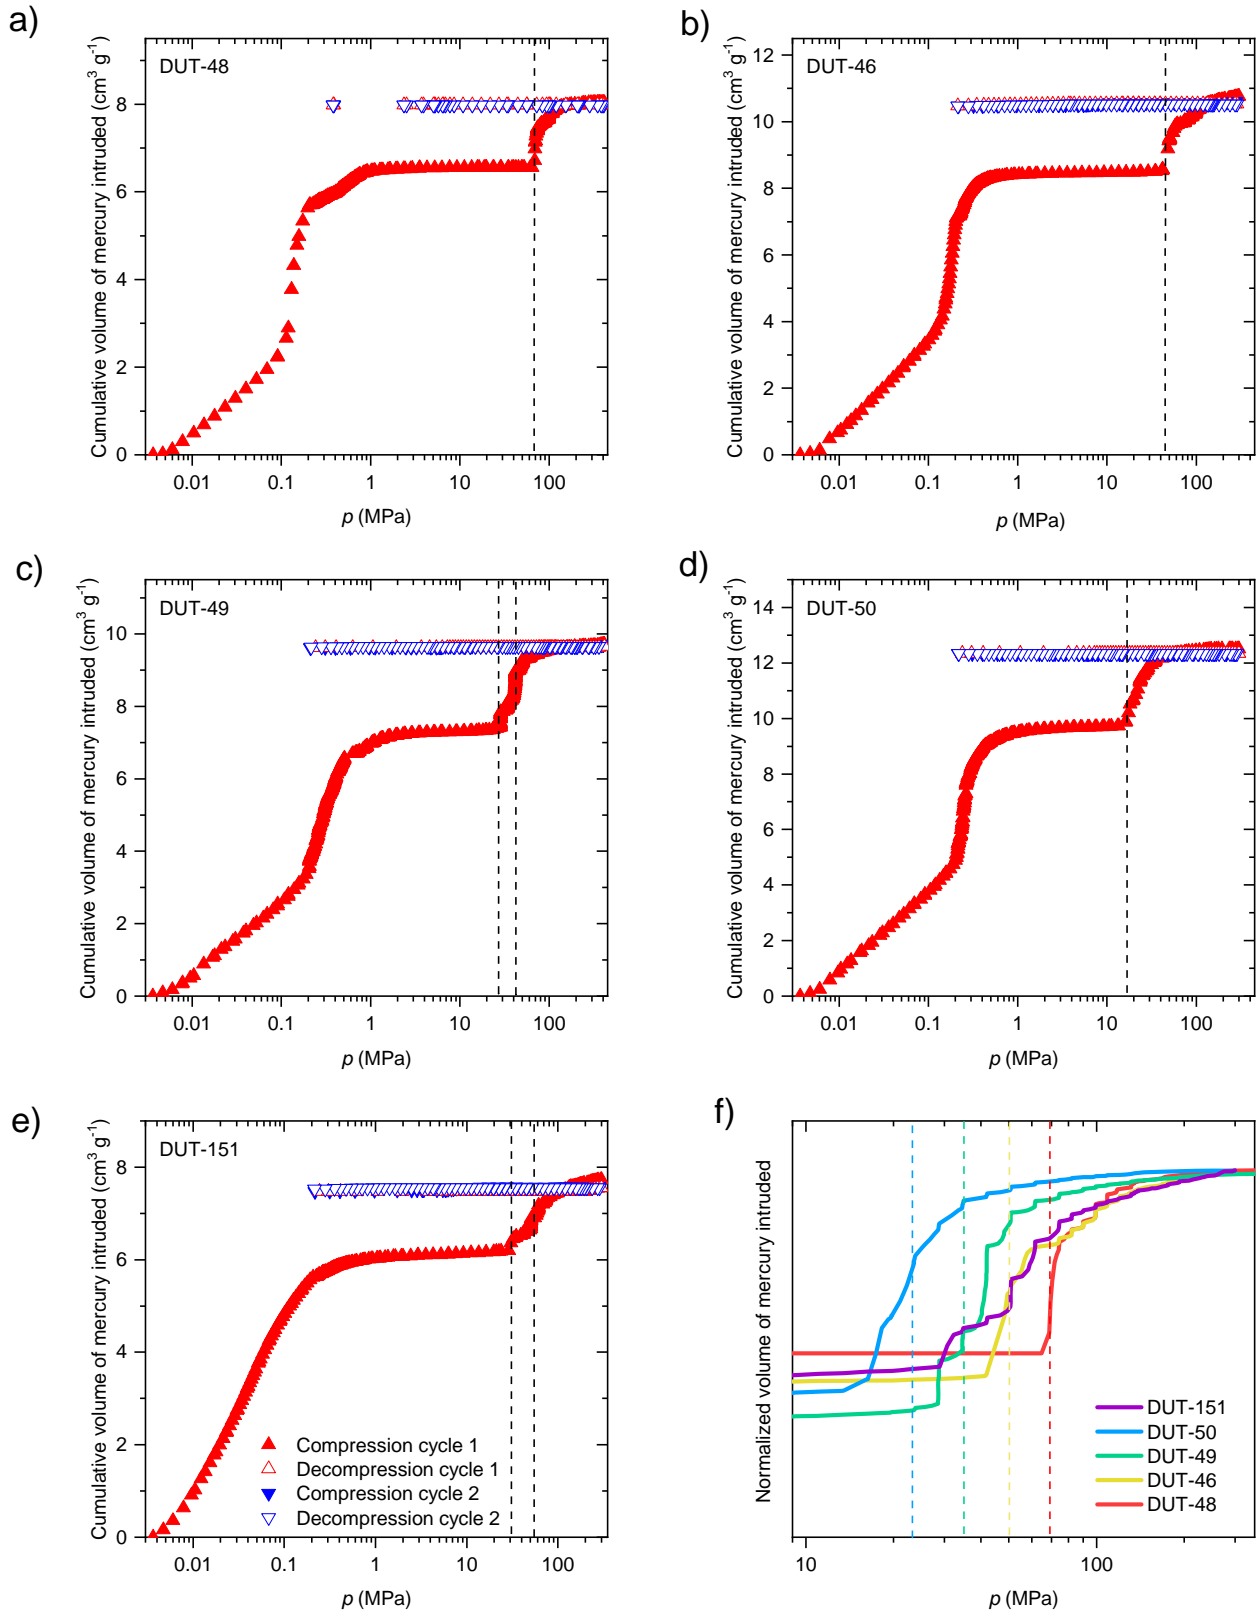

Supplementary Figure 17. Mercury intrusion curves for DUT-48 (a), DUT-46 (b), DUT-49 (c), DUT-50 (d), DUT-151 (e), and f) comparison of the intrusion curves with transition pressures indicated as dashed lines.

Supplementary Table 11. Summary of experimental details of Hg intrusion and comparison with simulated results.

|                        | Pore volume<br>(cm <sup>3</sup> g <sup>-1</sup> ) | Volume change<br>Hg intrusion<br>total (cm <sup>3</sup> g <sup>-1</sup> ) | Volume<br>change<br>Hg<br>intrusion<br>total (%) | $\Delta V$<br>simulation<br><i>op - cp</i> (%) | Transition<br>pressure<br>measured<br>(MPa) | Transition<br>pressure<br>simulated<br>(MPa) |
|------------------------|---------------------------------------------------|---------------------------------------------------------------------------|--------------------------------------------------|------------------------------------------------|---------------------------------------------|----------------------------------------------|
| DUT-48                 | 1.98                                              | 1.5                                                                       | 63.7                                             | 44.0                                           | 65                                          | 145                                          |
| DUT-46                 | 2.153                                             | 2.01                                                                      | 77.8                                             | 47.2                                           | 50                                          | 84                                           |
| DUT-49                 | 2.89                                              | 2.30                                                                      | 71.8                                             | 51.4                                           | 35                                          | 65                                           |
| DUT-50                 | 4.02                                              | 2.78                                                                      | 65.3                                             | 59.2                                           | 24                                          | 38                                           |
| DUT-151                | n. a.                                             | n. a.                                                                     | n. a.                                            | 62.5                                           | n. a.                                       | 22                                           |
| DUT-151 <sub>int</sub> | 1.891                                             | 1.53                                                                      | 56.4                                             | 27.9                                           | 29                                          | n. a.                                        |

## Supplementary Note 7: Parallelised powder X-ray diffraction and high resolution gas adsorption studies of microcrystalline MOF powders

*In situ*-PXRD studies and parallelised gas adsorption were measured at KMC-2 beamline<sup>27</sup> of the BESSY II synchrotron, operated by Helmholtz-Zentrum Berlin für Materialien und Energie. Self-designed automated instrumentation, based on the volumetric adsorption instrument and closed-cycle Helium cryostat, equipped with adsorption chamber with beryllium domes was used in all experiments.<sup>28</sup> PXRD patterns were measured at constant wavelength  $\lambda = 0.15406$  nm ( $E = 8048$  eV) in transmission geometry. Because of the bulky cryostat, the sample holder cannot rotate during experiments, however an average crystallite size in the range of 2-15  $\mu\text{m}$  and using an area 2D detector (Vantec 2000, Bruker) allowed to record diffraction images with reasonable particle statistics. Each 2D image was measured with 31 s exposure. For each experiment 10-12 mg of sample were used. In order to block the reflections coming from the crystalline Be-dome, a tungsten aperture with 5 mm opening was mounted on the detector cone. The obtained diffraction images were integrated using DATASQUEEZE 2.2.9<sup>29</sup> with further processing in FITYK 0.9<sup>30</sup> software. PXRD patterns, measured for DUT-50 during adsorption and desorption of methane at 111 K (Supplementary Figure 20) and *n*-butane at 273 K (Supplementary Figure 19) were obtained in the automatic mode in parallel to the isotherm measurement. The dataset of DUT-151*int* tracking the adsorption and desorption of *n*-butane at 273 K was collected in the automated modus as well (Supplementary Figure 22). For all automated measurements the physisorption isotherms were measured using equilibrium settings for pressure change of 0.1% within 300 s. The dataset during *n*-butane adsorption at 303 K (Supplementary Figure 18) as well as the analysis of DUT-151*int* at 273 K (Supplementary Figure 22) was measured in the manual mode. Each pressure was set manually and PXRD patterns were measured after the pressure in the cell was stabilized for at least 300 s.

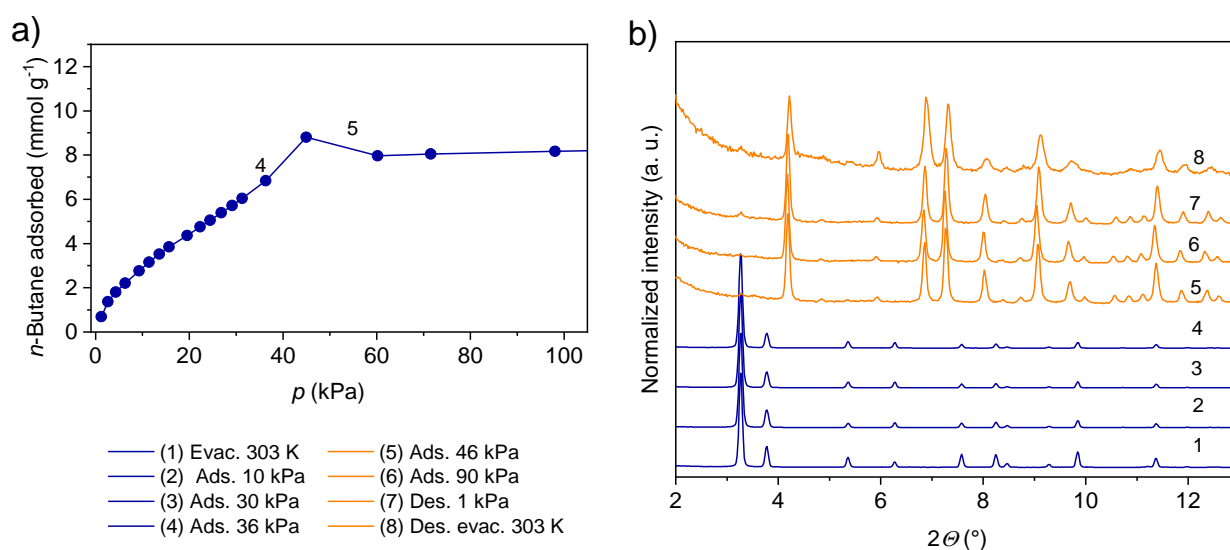

Supplementary Figure 18. *In situ*-PXRD data for DUT-49: a) *n*-butane adsorption isotherm at 303 K and corresponding PXRD patterns at varying pressures.

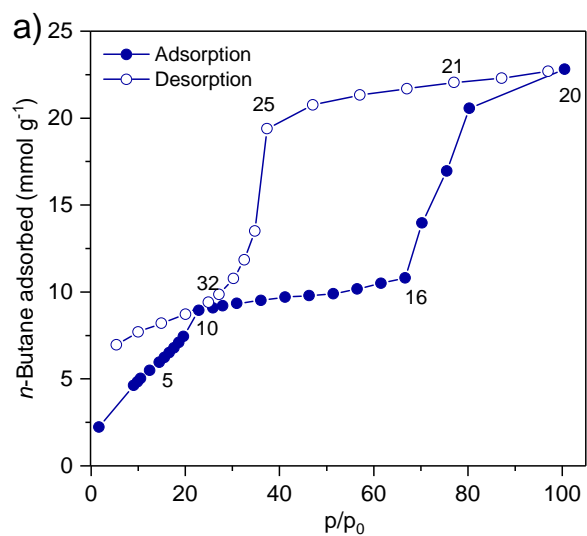

- |                     |                              |
|---------------------|------------------------------|
| (1) evac 273 K      | (21) Des. 77.02 kPa          |
| (2) Ads. 10.49 kPa  | (22) Des. 57.03 kPa          |
| (3) Ads. 12.44 kPa  | (23) Des. 47.09 kPa          |
| (4) Ads. 14.48 kPa  | (24) Des. 37.37 kPa          |
| (5) Ads. 15.58 kPa  | (25) Des. 34.80 kPa          |
| (6) Ads. 16.59 kPa  | (26) Des. 32.52 kPa          |
| (7) Ads. 17.62 kPa  | (27) Des. 30.24 kPa          |
| (8) Ads. 18.63 kPa  | (28) Des. 27.19 kPa          |
| (9) Ads. 19.64 kPa  | (29) Des. 24.91 kPa          |
| (10) Ads. 22.88 kPa | (30) Des. 20.06 kPa          |
| (11) Ads. 25.86 kPa | (31) Des. 14.97 kPa          |
| (12) Ads. 27.91 kPa | (32) Des. 10.04 kPa          |
| (13) Ads. 30.96 kPa | (33) Des. 5.43 kPa           |
| (14) Ads. 36.05 kPa | (34) evac. 298 Des. evac. 27 |
| (15) Ads. 41.16 kPa | (35) Des. evac. 298 K        |
| (16) Ads. 56.45 kPa |                              |
| (17) Ads. 61.53 kPa |                              |
| (18) Ads. 70.23 kPa |                              |
| (19) Ads. 80.28 kPa |                              |
| (20) Ads. 100.5 kPa |                              |

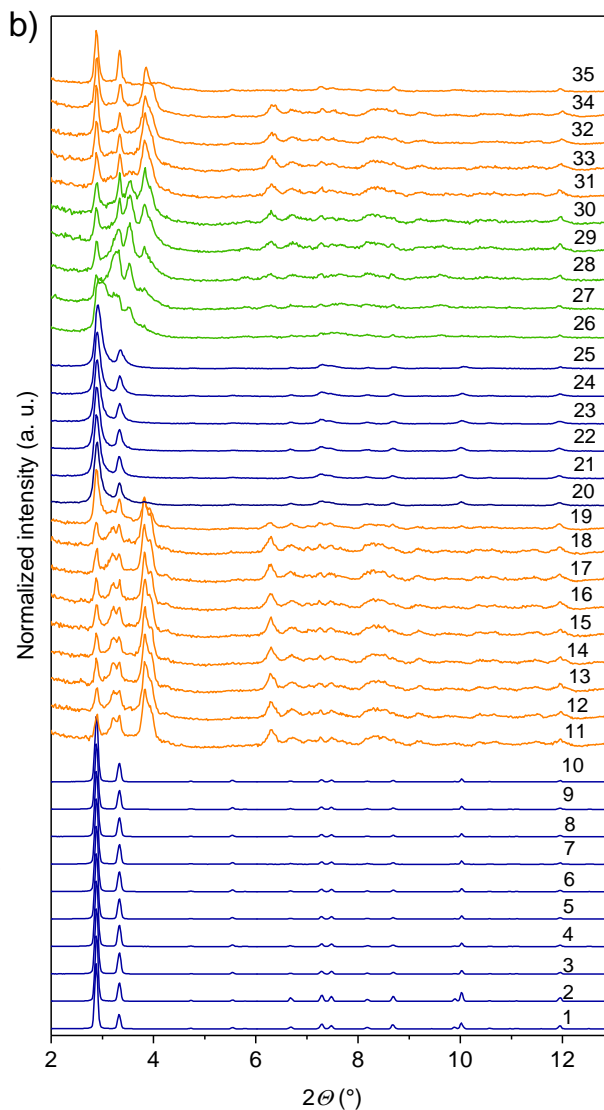

Supplementary Figure 19. DUT-50 *in situ*-PXRD dataset with a) *n*-butane isotherm at 273 K and corresponding PXRD patterns at varying pressures. Filled symbols: adsorption, empty symbols: desorption.

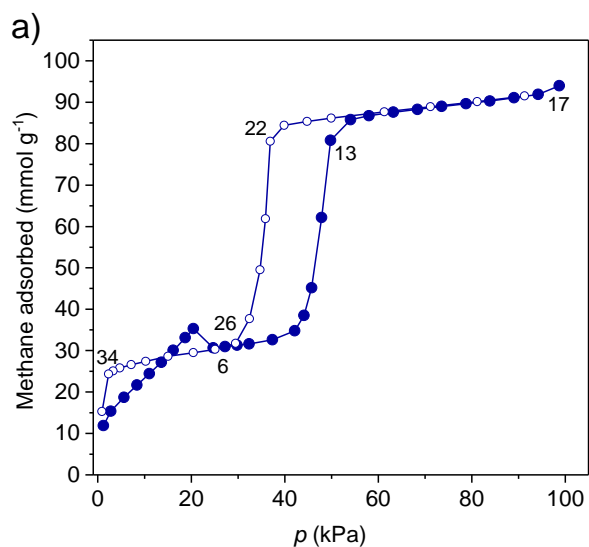

- |                   |                   |
|-------------------|-------------------|
| (1) evac. 111 K   | (18) 61.3 kPa des |
| (2) 1.2 kPa ads   | (19) 49.9 kPa des |
| (3) 5.6 kPa ads   | (20) 44.8 kPa des |
| (4) 11.0 kPa ads  | (21) 39.9 kPa des |
| (5) 16.1 kPa ads  | (22) 36.9 kPa des |
| (6) 27.2 kPa ads  | (23) 35.8 kPa des |
| (7) 29.8 kPa ads  | (24) 34.7 kPa des |
| (8) 37.3 kPa ads  | (25) 32.4 kPa des |
| (9) 42.1 kPa ads  | (26) 29.5 kPa des |
| (10) 44.2 kPa ads | (27) 25.1 kPa des |
| (11) 45.8 kPa ads | (28) 20.5 kPa des |
| (12) 47.9 kPa ads | (29) 15.0 kPa des |
| (13) 49.8 kPa ads | (30) 10.2 kPa des |
| (14) 58.0 kPa ads | (31) 7.1 kPa des  |
| (15) 63.2 kPa ads | (32) 4.7 kPa des  |
| (16) 73.6 kPa ads | (33) 3.2 kPa des  |
| (17) 98.8 kPa ads | (34) 2.3 kPa des  |
|                   | (35) 0.8 kPa des  |
|                   | (36) evac. 111 K  |
|                   | (37) evac. 298 K  |

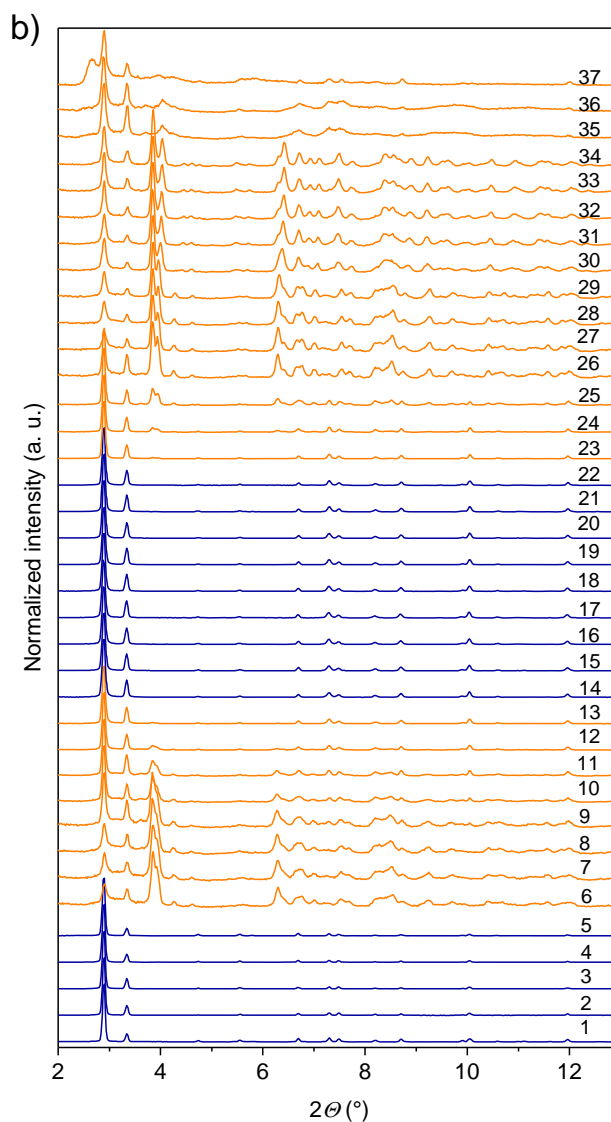

Supplementary Figure 20. DUT-50 *in situ*-PXRD dataset with a) methane isotherm at 111 K and corresponding PXRD patterns at varying pressures. Filled symbols: adsorption, empty symbols: desorption.

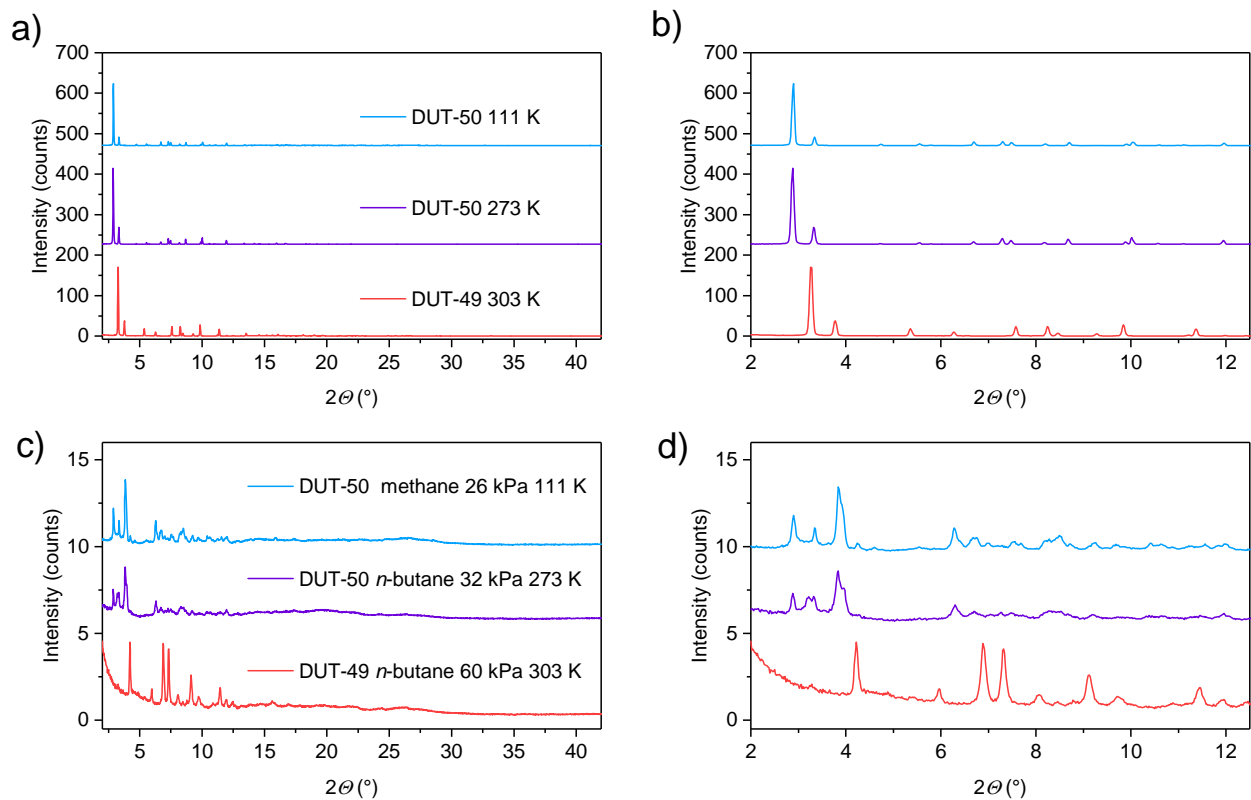

Supplementary Figure 21. Comparison of PXRD patterns of DUT-49 and DUT-50 in a,b) open pore, and c,d) in contracted pore (offset is 220 counts in a,b and 5 counts in c,d).

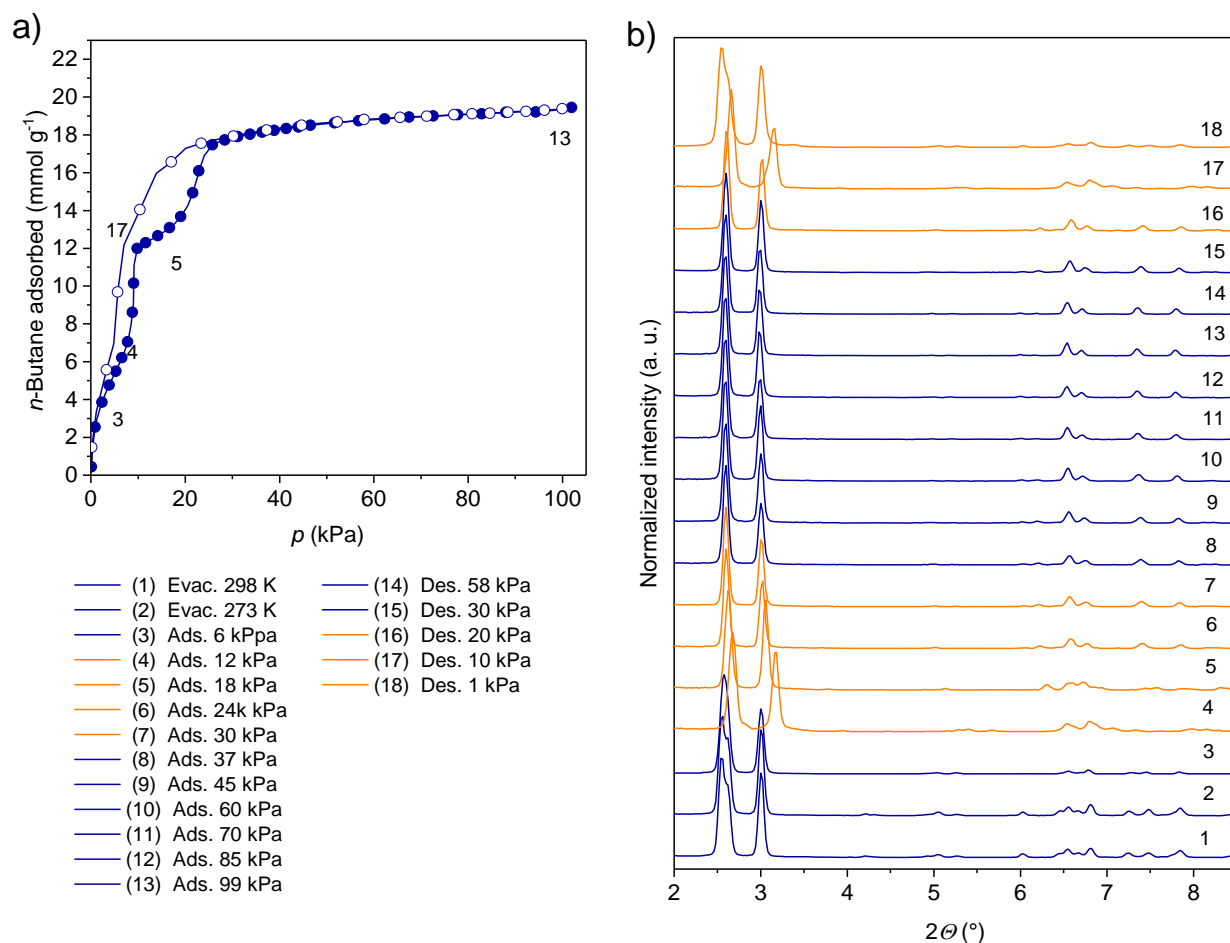

Supplementary Figure 22. DUT-151int *in situ*-PXRD dataset with a) *n*-butane at 273 K and corresponding PXRD patterns at varying pressures. Filled symbols: adsorption, empty symbols: desorption.

*In situ* PXRD patterns of DUT-50 show a peak broadening and reduced crystallinity upon adsorption of *n*-butane at 20 kPa and 273 K indicating the formation of *cp* phase. At elevated pressure the peaks of the pristine *op* phase reappear reflecting the reversible reopening of the structure and indicating a rare crystalline-disordered-crystalline transition. Upon desorption, the *op* phase undergoes contraction at 25 kPa without indications for reopening at lower pressure. The fact that DUT-50*cp* completely reopens at higher pressures suggests that the framework connectivity is preserved and is an evidence for a cooperative transformation within a single crystal.

*In situ* PXRD patterns, measured for DUT-50 during the adsorption of methane at 111 K show enhanced diffraction intensities and improved pattern quality (Supplementary Figure 23) and were thus subjected to detailed analysis involving indexing and full pattern decomposition using Le Bail fit<sup>31</sup>, implemented into the FullProf software<sup>32</sup>.



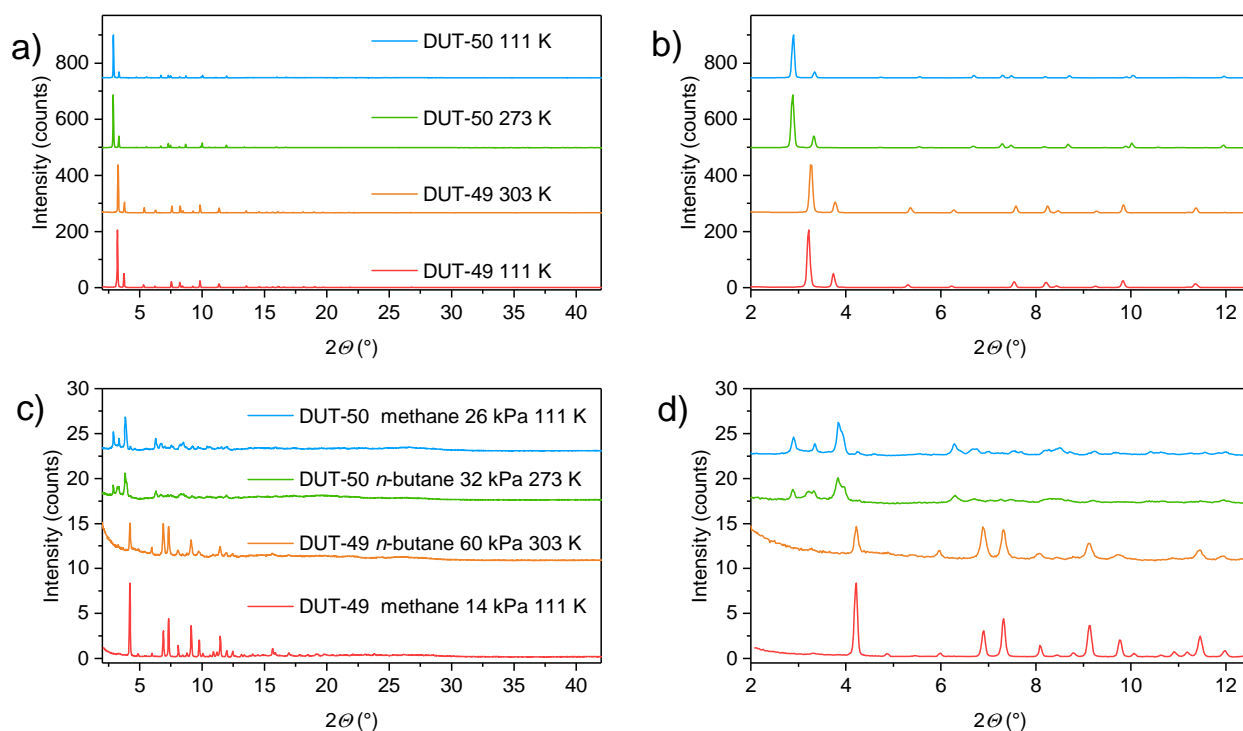

Supplementary Figure 23. Comparison of PXRD patterns of DUT-49 and DUT-50 in a,b) open pore, and c,d) in contracted pore upon adsorption of *n*-butane and methane at 111 and 303 K. a,c) wide angle diffractogram; b,d) magnification of small angle region.

The presence of a second set of reflections different from that of DUT-50<sub>op</sub> after contraction could be attributed to DUT-50<sub>cp</sub>. PXRD patterns measured during adsorption of methane between 0 and 16 kPa show phase pure DUT-50<sub>op</sub>. After the phase transition and NGA at 20 kPa, the PXRD patterns become more complex in comparison with DUT-49. Firstly, only part of the bulk is transformed into the *cp* phase, with peaks of the *op* phase present in PXRD patterns throughout the whole pressure range. The most probable reason for this behaviour are crystallite size effects which have been shown to result in phase mixtures upon adsorption of nitrogen in DUT-49<sup>7</sup>. Secondly, in the pressure range of 21-45 kPa during adsorption in which the *cp* phase is present, the PXRD patterns reflect low crystallinity and peak broadening at higher  $2\theta$  angles in comparison with PXRD patterns of *op* phase at lower pressures. Thirdly, the measured PXRD pattern of DUT-50<sub>cp</sub> contains two reflections in the  $2\theta$  range of  $3.7 - 4.1^\circ$  with different splitting dependent on the gas pressure in the cell. *Ab initio* indexing of PXRD patterns was difficult due to the present phase mixture and peak broadening. Therefore, an empirical analysis of the experimental PXRD patterns by using calculated PXRD patterns from simulated DUT-50<sub>cp</sub> phase in  $Pa\bar{3}$  symmetry – the symmetry of DUT-49<sub>cp</sub> – and lattice parameter of 38.29 Å was performed. The reflection in the range of  $3.7-4.1^\circ$  of the simulated cubic unit cell with index (111) represents the interplanar distances between the space diagonals of the cubic unit cell. The splitting of the reflection can be a sign of inequality of the space diagonals in the unit cell which is only possible in non-orthogonal unit cells. Therefore, the symmetry was first reduced to rhombohedral ( $R3$ ), however no satisfactory Le Bail fit could be obtained at larger splitting of the peak. Consequently, the symmetry of the space group was

further reduced to monoclinic  $P2_1/c$  for which the multiphase Le Bail fit resulted in reasonable reliability factors. Therefore, the whole series of measured *in situ* PXRD patterns of DUT-50 upon adsorption and desorption of methane at 111 K was subjected to profile matching procedure with constant scale factor. The PXRD profile was modelled using pseudo-Voigt function with axial divergence and asymmetry of reflections was additionally treated using Berar-Baldinozzi function in Material Studio<sup>33</sup>. The background was refined as linear interpolation between a set of background points with reliable heights. No zero-line shift was refined during the fitting. The obtained unit cell parameters are very close to the theoretically predicted model ranging from 38.18 to 39.49 Å. The monoclinic angle, inducing the splitting of (111) and (11-1) reflections is gas pressure-dependent and ranges from 92.2° to 93.9°. The evolution of unit cell parameter is summarized in Supplementary Table 12 and displayed in Supplementary Figure 24.

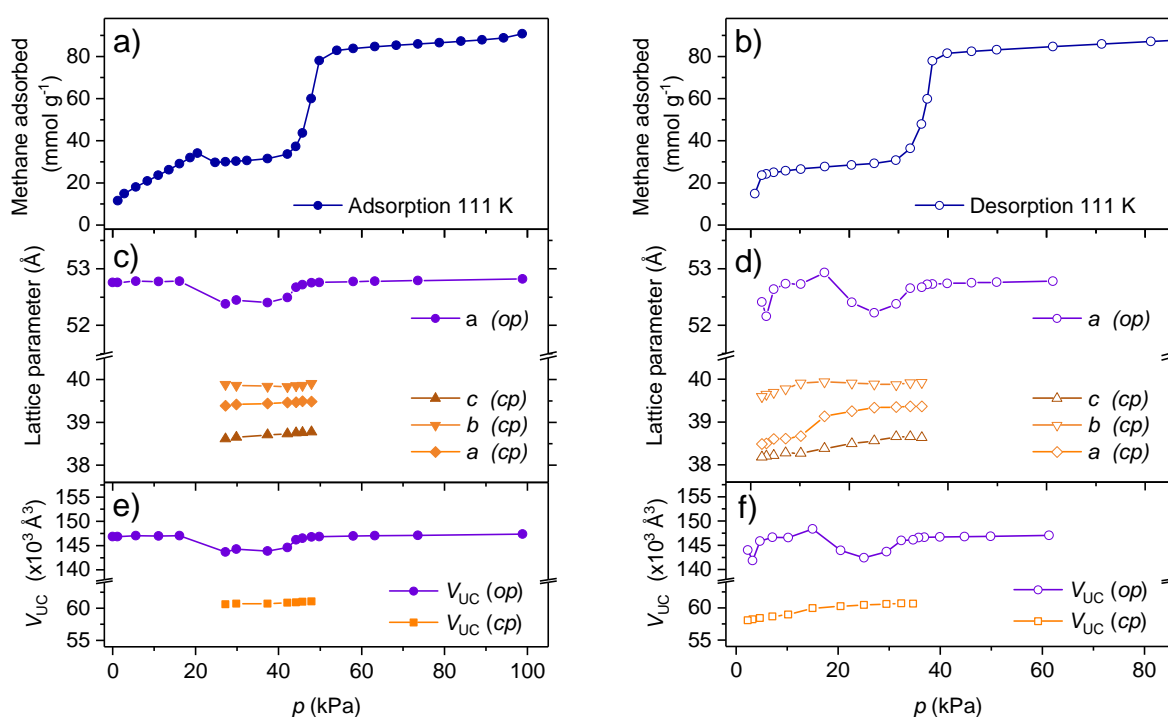

Supplementary Figure 24. a) Adsorption (filled symbols) and desorption (empty symbols) isotherm of methane at 111 K of DUT-50. c,d) Lattice parameter evolution of DUT-50 upon adsorption (c) and desorption (d) of the *op* phase (cubic symmetry  $Fm\bar{3}m$ ) and *cp* phase (monoclinic symmetry  $P2_1/c$ ). *op* phase is shown as purple circles, *cp* phases as orange triangles and squares.

The evolution of the unit cell volume is very similar to DUT-49 with a decrease of 58% upon structural contraction. In addition, the residual *op* phase undergoes minor contraction in the range of 25 – 45 kPa and a complete reopening of the *cp* phases can be observed at pressures beyond 50 kPa. During desorption, the *op* phase is found to transform into the *cp* phase at 38 kPa and the unit cell parameter and volume is found to decrease with decreasing pressure. Residual *op* phase is observed throughout the whole investigated pressure range. Interestingly, the unit cell volume of the *op* phase is slightly reduced in the range of 20-30 kPa. This indicates that the residual *op* phase also exhibits a structural response to the adsorption-induced stress upon adsorption and desorption but to a minor extent. Rietveld analysis of the experimental PXRD patterns of *cp* phase was not possible due to the poor quality and present phase

mixture. Consequently, structural models on the basis of the symmetry and lattice parameter refined by Le Bail methods were constructed and optimized with Materials Studio<sup>33</sup>. For this set of quasi-experimental structures the specific pore volume for the simulated structures of DUT-50 $op$  and  $cp$  was subsequently calculated using Zeo++<sup>16</sup> software (in detail described below). Comparison of the simulated specific pore volume of the quasi-experimental structures with the modelled structures based on MD simulation show good agreement for both  $op$  and  $cp$  phase (Supplementary Figure 25).

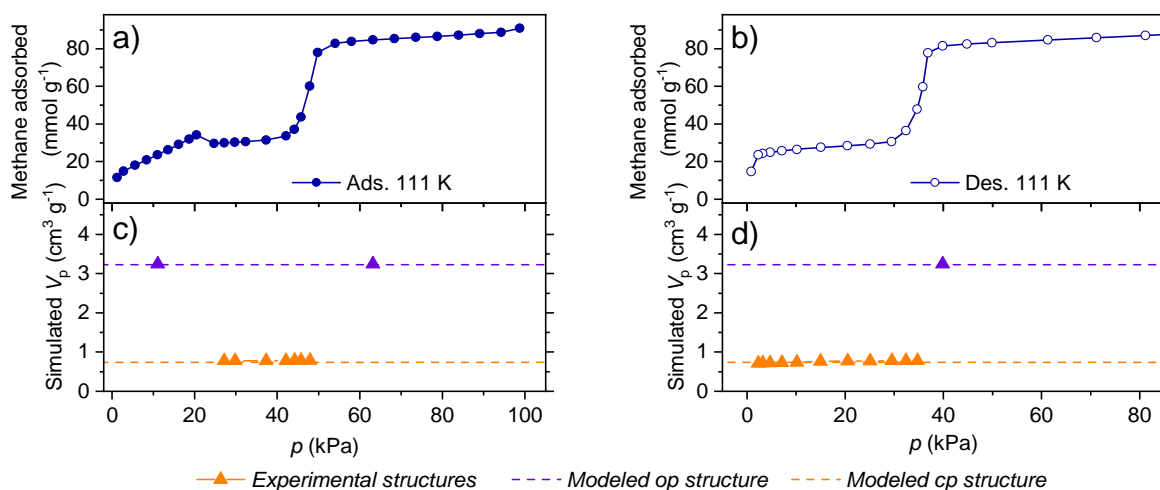

Supplementary Figure 25. a) Adsorption (filled symbols) and desorption (empty symbols) isotherm of methane at 111 K of DUT-50. c,d) Evolution of simulated pore volume (using Zeo++) of DUT-50 upon adsorption (c) and desorption (d) of the  $op$  phase (purple) and  $cp$  phase (orange). Simulated pore volumes of the structural models determined by MD simulations are given as horizontal dashed lines.

Supplementary Table 12. Data obtained from Le Bail refinement of PXRD patterns collected during adsorption of methane at 111 K in DUT-50.

| <i>P</i> (kPa) | Pattern No<br>(Supplementary<br>Figure 22) | DUT-50 <i>op</i><br>( <i>Fm</i> $\bar{3}m$ ) |                            | DUT-50 <i>cp</i> ( <i>P2</i> <sub>1</sub> / <i>c</i> ) |              |              |             |                            | <i>R<sub>p</sub></i><br>(%) | <i>R<sub>wp</sub></i><br>(%) |
|----------------|--------------------------------------------|----------------------------------------------|----------------------------|--------------------------------------------------------|--------------|--------------|-------------|----------------------------|-----------------------------|------------------------------|
|                |                                            | <i>a</i> (Å)                                 | <i>V</i> (Å <sup>3</sup> ) | <i>a</i> (Å)                                           | <i>b</i> (Å) | <i>c</i> (Å) | $\beta$ (°) | <i>V</i> (Å <sup>3</sup> ) |                             |                              |
| Evac.<br>111K  | 1                                          | 52.756 (1)                                   | 146833                     | -                                                      | -            | -            | -           | -                          | 7.98                        | 12.90                        |
| 1.2            | 2                                          | 52.756 (1)                                   | 146830                     | -                                                      | -            | -            | -           | -                          | 7.68                        | 12.70                        |
| 5.6            | 3                                          | 52.777(1)                                    | 147009                     | -                                                      | -            | -            | -           | -                          | 7.95                        | 12.70                        |
| 11.1           | 4                                          | 52.775(1)                                    | 146988                     | -                                                      | -            | -            | -           | -                          | 8.01                        | 13.10                        |
| 16.1           | 5                                          | 52.779(1)                                    | 147020                     | -                                                      | -            | -            | -           | -                          | 8.43                        | 13.60                        |
| 27.2           | 6                                          | 52.380(1)                                    | 143709                     | 38.611(3)                                              | 39.886(2)    | 39.384(2)    | 92.12(1)    | 60611(6)                   | 3.60                        | 5.56                         |
| 29.8           | 7                                          | 52.445(4)                                    | 144252                     | 38.651(3)                                              | 39.862 (2)   | 39.419 (3)   | 92.03 (1)   | 60695(6)                   | 3.62                        | 5.36                         |
| 37.3           | 8                                          | 52.401(5)                                    | 143887                     | 38.713(2)                                              | 39.841(2)    | 39.436(2)    | 92.08(1)    | 60684(6)                   | 3.50                        | 5.51                         |
| 42.1           | 9                                          | 52.491(3)                                    | 144629                     | 38.728(2)                                              | 39.830(2)    | 39.463(2)    | 92.08(1)    | 60832(6)                   | 3.71                        | 5.70                         |
| 44.2           | 10                                         | 52.674(2)                                    | 146151                     | 38.751(3)                                              | 39.854(3)    | 39.470(2)    | 92.08(1)    | 60915(6)                   | 3.71                        | 5.81                         |
| 45.8           | 11                                         | 52.720(1)                                    | 146527                     | 38.763(2)                                              | 39.863 (2)   | 39.494(2)    | 92.04 (1)   | 60987(6)                   | 3.82                        | 5.87                         |
| 47.9           | 12                                         | 52.751(1)                                    | 146789                     | 38.777 (2)                                             | 39.910(3)    | 39.486 (3)   | 92.02 (1)   | 61070(7)                   | 4.05                        | 6.60                         |
| 49.8           | 13                                         | 52.756(1)                                    | 146829                     | -                                                      | -            | -            | -           | -                          | 6.55                        | 10.20                        |
| 58.0           | 14                                         | 52.773(1)                                    | 146974                     | -                                                      | -            | -            | -           | -                          | 7.01                        | 10.80                        |
| 63.2           | 15                                         | 52.780(1)                                    | 147031                     | -                                                      | -            | -            | -           | -                          | 6.08                        | 9.39                         |
| 73.6           | 16                                         | 52.792(1)                                    | 147128                     | -                                                      | -            | -            | -           | -                          | 6.86                        | 10.20                        |
| 98.8           | 17                                         | 52.816(1)                                    | 147335                     | -                                                      | -            | -            | -           | -                          | 7.97                        | 11.40                        |

Supplementary Table 13. Data obtained from Le Bail refinement of PXRD patterns collected during desorption of methane at 111 K in DUT-50.

| $p$<br>(kPa) | Pattern No<br>(Supplementary<br>Figure 22) | DUT-50 $op$ ( $Fm\bar{3}m$ )               |                        | DUT-50 $cp$ ( $P2_1/c$ ) |                      |                      |                      |                        | $R_p$ (%) | $R_{wp}$<br>(%) |
|--------------|--------------------------------------------|--------------------------------------------|------------------------|--------------------------|----------------------|----------------------|----------------------|------------------------|-----------|-----------------|
|              |                                            | Lattice<br>parameter $a$ ,<br>$\text{\AA}$ | $V$ ( $\text{\AA}^3$ ) | $a$ ( $\text{\AA}$ )     | $b$ ( $\text{\AA}$ ) | $c$ ( $\text{\AA}$ ) | $\beta$ ( $^\circ$ ) | $V$ ( $\text{\AA}^3$ ) |           |                 |
| 61.3         | 18                                         | 52.779 (1)                                 | 147026                 | -                        | -                    | -                    | -                    | -                      | 7.31      | 10.3            |
| 49.9         | 19                                         | 52.759 (1)                                 | 146857                 | -                        | -                    | -                    | -                    | -                      | 6.57      | 9.56            |
| 44.8         | 20                                         | 52.749 (1)                                 | 146773                 | -                        | -                    | -                    | -                    | -                      | 6.35      | 8.91            |
| 39.9         | 21                                         | 52.738(1)                                  | 146677                 | -                        | -                    | -                    | -                    | -                      | 6.41      | 9.15            |
| 36.9         | 22                                         | 52.729 (1)                                 | 146608                 | -                        | -                    | -                    | -                    | -                      | 6.65      | 9.31            |
| 35.8         | 23                                         | 52.723 (1)                                 | 146555                 | -                        | -                    | -                    | -                    | -                      | 6.92      | 10.6            |
| 34.7         | 24                                         | 52.671 (1)                                 | 146125                 | 38.633(2)                | 39.923(2)            | 39.368(2)            | 92.18 (1)            | 60673(3)               | 4.61      | 7.77            |
| 32.4         | 25                                         | 52.652(1)                                  | 145963                 | 38.655(2)                | 39.918 (2)           | 39.365(2)            | 92.18(1)             | 60697(4)               | 3.90      | 6.42            |
| 29.5         | 26                                         | 52.377 (4)                                 | 143690                 | 38.656 (3)               | 39.876(3)            | 39.354(2)            | 92.18 (1)            | 60618(6)               | 4.18      | 6.78            |
| 25.1         | 27                                         | 52.221(8)                                  | 142405                 | 38.561(3)                | 39.887(3)            | 39.338 (2)           | 92.23 (1)            | 60459(7)               | 4.51      | 7.78            |
| 20.5         | 28                                         | 52.408(6)                                  | 143940                 | 38.494(2)                | 39.907(2)            | 39.255(2)            | 92.31 (1)            | 60252(6)               | 4.12      | 7.05            |
| 15.0         | 29                                         | 52.933 (6)                                 | 148313                 | 38.380 (2)               | 39.943(2)            | 39.138 (2)           | 92.41 (1)            | 59946(5)               | 3.98      | 6.52            |
| 10.2         | 30                                         | 52.727 (3)                                 | 146590                 | 38.274(1)                | 39.909(1)            | 38.671(2)            | 93.21 (1)            | 58975(4)               | 3.32      | 4.95            |
| 7.1          | 31                                         | 52.735(3)                                  | 146652                 | 38.281(1)                | 39.780(1)            | 38.614(2)            | 93.57(1)             | 58687(4)               | 3.25      | 4.70            |
| 4.7          | 32                                         | 52.637 (3)                                 | 145839                 | 38.219 (1)               | 39.692(1)            | 38.604(2)            | 93.68 (1)            | 58440(4)               | 3.46      | 5.18            |
| 3.2          | 33                                         | 52.156(5)                                  | 141876                 | 38.201 (2)               | 39.653 (2)           | 38.504 (2)           | 93.76(1)             | 58201(5)               | 3.59      | 5.16            |
| 2.3          | 34                                         | 52.413 (3)                                 | 143988                 | 38.180(1)                | 39.601(1)            | 38.487(2)            | 93.78(1)             | 58062(4)               | 3.42      | 4.93            |

The PXRD patterns obtained for DUT-151*int* after supercritical activation (DUT-151*int-act*) show a shift of peaks in the range of 2-3.5 ° to lower  $2\theta$  values and appearance of new reflections in comparison to the as made material are observed.

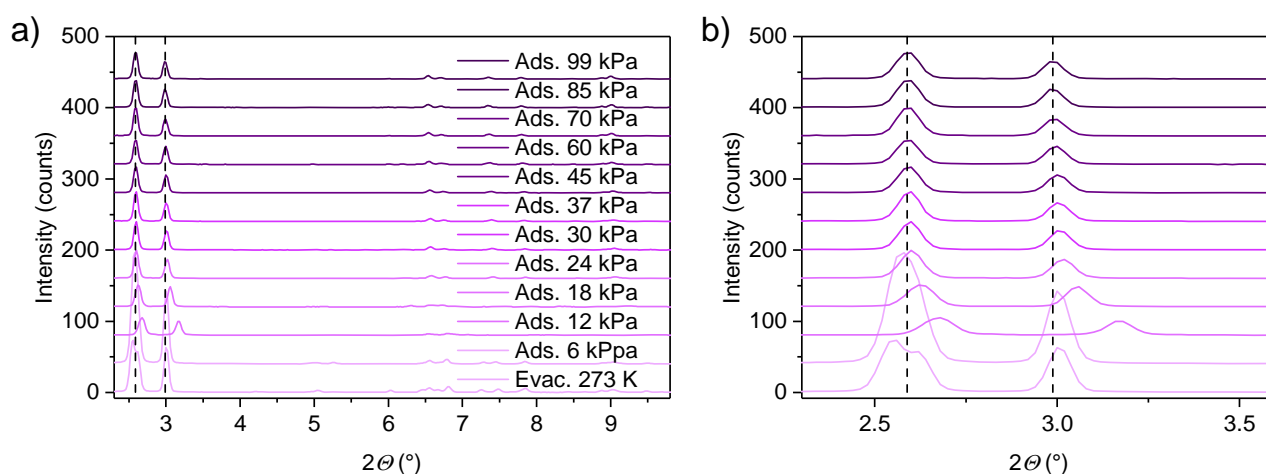

Supplementary Figure 26. a) PXRD patterns of DUT-151*int* upon loading with *n*-butane at 273 K and b) magnified small angle region. Dashed lines represent peak positions of DUT-151*int*.

This change can be assigned to a change in symmetry and unit cell volume upon solvent removal from monoclinic  $C2/m$  (in solvated DUT-151*int*) to triclinic  $P\bar{1}$  in DUT-151*int-act* determined by indexing of the PXRD pattern. At intermediate pressures in the range of 8 - 10 kPa, a step and hysteresis in the isotherm are observed. Indexing of *in situ* PXRD patterns in this pressure region shows that the symmetry of the unit cell is transformed to the initial monoclinic  $C2/m$  space group, however the structure of DUT-151*int-cp* ( $87419 \text{ \AA}^3$ ) is found to be contracted by 14% in unit cell volume in comparison to DUT-151*int* ( $101103 \text{ \AA}^3$ ). The full list of cell parameter refined from the *in situ* PXRD data is displayed in Supplementary Table 14 and further illustrated in Supplementary Figure 27.

Supplementary Table 14. Le Bail fit of PXRD patterns (Supplementary Figure 22), measured *in situ* at 273 K during loading of *n*-butane.

| $p$ (kPa)      | Space group | $a$ (Å)     | $b$ (Å)    | $c$ (Å)     | $\alpha$ (°) | $\beta$ (°) | $\gamma$ (°) | $R_p$ | $R_{wp}$ |
|----------------|-------------|-------------|------------|-------------|--------------|-------------|--------------|-------|----------|
| Evac 298K      | $P\bar{1}$  | 41.204(2)   | 40.981(2)  | 42.234(4)   | 119.62(1)    | 119.66(1)   | 59.66(6)     | 2.97  | 4.99     |
| Evac 273       | $P\bar{1}$  | 41.187(2)   | 41.013(3)  | 42.221(3)   | 119.67(1)    | 119.70(1)   | 59.64(1)     | 3.05  | 4.48     |
| 6 ads          | $P\bar{1}$  | 41.313(3)   | 41.101(3)  | 42.183(2)   | 119.92(1)    | 119.95(1)   | 59.50(1)     | 4.44  | 9.54     |
| 12 ads         | $C 2/m$     | 70.1749(62) | 37.727(24) | 41.3181(19) | 90           | 127.02(1)   | 90           | 4.99  | 8.42     |
| 18 ads         | $C 2/m$     | 71.557(3)   | 38.078(3)  | 41.207(2)   | 90           | 126.04(1)   | 90           | 4.90  | 7.29     |
| 24 ads         | $C 2/m$     | 72.185(3)   | 38.455(3)  | 41.210(2)   | 90           | 125.79 (2)  | 90           | 5.49  | 10.90    |
| 30 ads         | $C 2/m$     | 72.224(4)   | 38.483(4)  | 41.299(3)   | 90           | 125.70 (1)  | 90           | 5.87  | 12.1     |
| 37 ads         | $C 2/m$     | 72.322(3)   | 38.515(3)  | 41.342(2)   | 90           | 125.72(1)   | 90           | 5.35  | 9.74     |
| 45 ads         | $C 2/m$     | 72.387(3)   | 38.518(2)  | 41.371(2)   | 90           | 125.73(1)   | 90           | 5.09  | 9.18     |
| 60 ads         | $C 2/m$     | 72.472(3)   | 38.583(3)  | 41.461(2)   | 90           | 125.67(1)   | 90           | 5.07  | 9.40     |
| 70 ads         | $C 2/m$     | 72.512(3)   | 38.605(2)  | 41.525(2)   | 90           | 125.60(1)   | 90           | 5.34  | 10.10    |
| 85 ads         | $C 2/m$     | 72.566(4)   | 38.623(3)  | 41.562(2)   | 90           | 125.60(1)   | 90           | 6.00  | 12.3     |
| 99 ads         | $C 2/m$     | 72.673(2)   | 38.628(2)  | 41.613(1)   | 90           | 125.70(1)   | 90           | 4.87  | 8.58     |
| 58 des         | $C 2/m$     | 72.657(2)   | 38.615(2)  | 41.686(1)   | 90           | 125.75(1)   | 90           | 4.87  | 8.59     |
| 30 des         | $C 2/m$     | 72.336(3)   | 38.638(3)  | 41.679(2)   | 90           | 125.80(1)   | 90           | 5.00  | 9.86     |
| 20 des         | $C 2/m$     | 72.203(3)   | 38.598(3)  | 41.671(2)   | 90           | 125.89(1)   | 90           | 5.07  | 9.38     |
| 10 des         | $C 2/m$     | 70.624(6)   | 37.866(5)  | 41.415(3)   | 90           | 126.55(1)   | 90           | 5.81  | 9.46     |
| 1 des          | $P\bar{1}$  | 41.318(4)   | 41.057(4)  | 42.266(4)   | 119.72(1)    | 119.91 (1)  | 59.49(1)     | 5.41  | 9.40     |
| Single crystal | $C 2/m$     | 71.700(14)  | 41.570(8)  | 41.450(8)   | 90           | 125.08(3)   | 90           | n. a. | n. a.    |

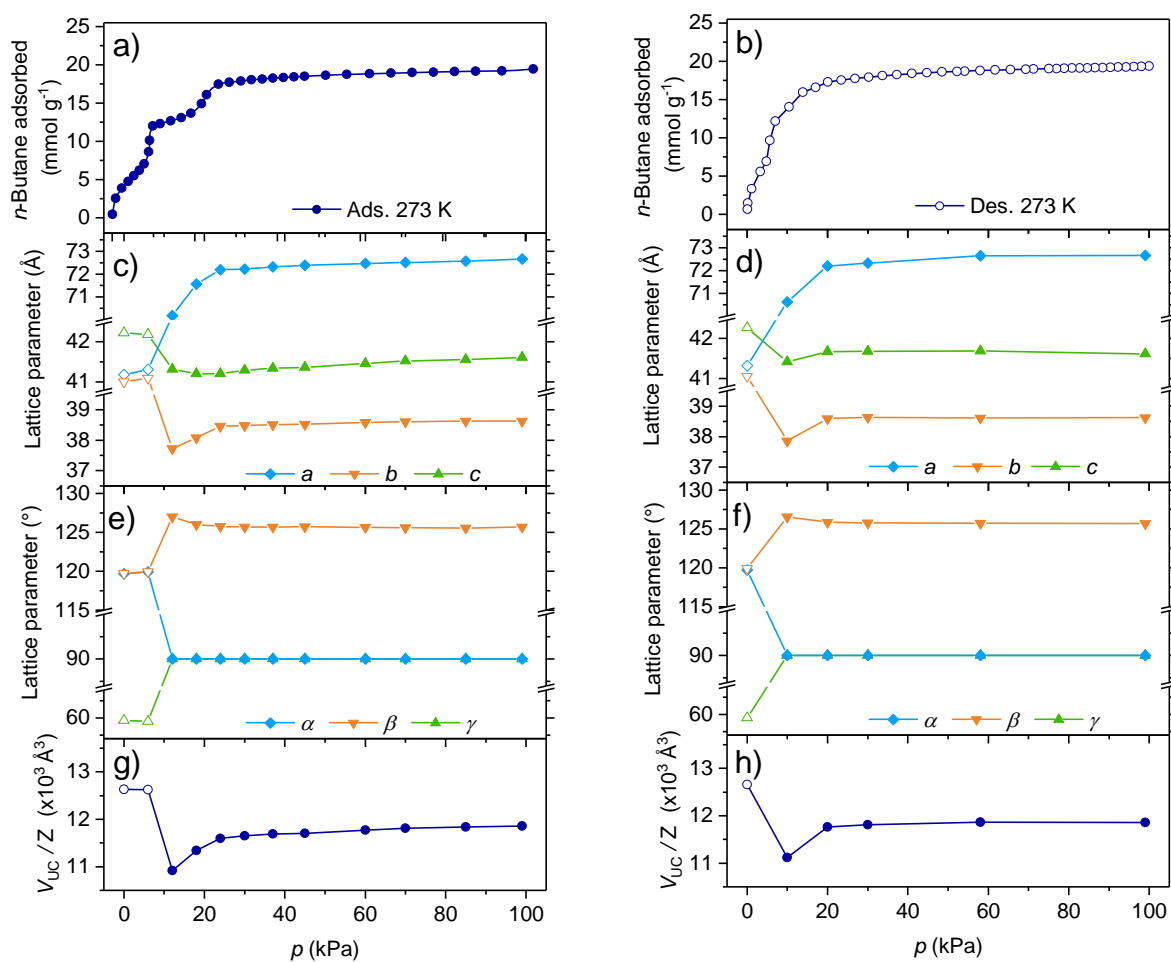

Supplementary Figure 27. a,b) Adsorption (closed symbols) and desorption (open symbols) isotherms of *n*-butane at 273 K. c-f) Corresponding lattice parameter evolution of the unit cells of DUT-151*int-act* (open symbols) and DUT-151*int-cp* and DUT-151*int-op* (closed symbols). e,f) Evolution of unit cell volume given in  $V_{UC} / Z$  to compare the volume evolution independent of the change in symmetry ( $Z(int, op, cp) = 8$ ,  $Z(act) = 4$ ). Tabulated values can be obtained from Supplementary Table 14.

With increasing pressure, the unit cell volume and lattice parameters increase reaching a unit cell volume of DUT-151*int-op* ( $101740 \text{ \AA}^3$ ) in the range of the unit cell obtained from the single crystal analysis of solvated DUT-151*int*. Upon desorption of *n*-butane at 273 K and 298 K DUT-151*int-op* is found to transform back to DUT-151*int-cp* which then transforms back to the original structure of DUT-151*int-act*. In contrast to DUT-49 and DUT-50, the structural transitions in DUT-151*int* are found to be fully reversible.

The crystal structures of DUT-151*int-op*, DUT-151*int-cp*, and DUT-151*int-act* could further be refined by Rietveld methods and a procedure previously described for the refinement of DUT-50*cp* from the *in situ* PXRD patterns recorded at 60 kPa, 12 kPa and evacuated, respectively. Because of low symmetry of the structures, adsorbed *n*-butane molecules were not considered in the refinement. The Rietveld plots are displayed in Supplementary Figure 28 - Supplementary Figure 30. The main structural data are summarized in Supplementary Table 15. CCDC 1890381, 1890382, and 1890383 contain structural data for DUT-151*int-act*, DUT-151*int-cp* and DUT-151*int-op*, respectively.



Supplementary Table 15. Experimental structural data on DUT-151*int-act*, DUT-151*int-cp* and DUT-151*int-op*.

|                                     | DUT-151 <i>int-act</i>                                                        | DUT-151 <i>int-cp</i>                                                         | DUT-151 <i>int-op</i>                                                         |
|-------------------------------------|-------------------------------------------------------------------------------|-------------------------------------------------------------------------------|-------------------------------------------------------------------------------|
| Formula unit                        | C <sub>52</sub> H <sub>28</sub> Cu <sub>2</sub> N <sub>2</sub> O <sub>8</sub> | C <sub>52</sub> H <sub>28</sub> Cu <sub>2</sub> N <sub>2</sub> O <sub>8</sub> | C <sub>52</sub> H <sub>28</sub> Cu <sub>2</sub> N <sub>2</sub> O <sub>8</sub> |
| <i>Z</i>                            | 12                                                                            | 24                                                                            | 24                                                                            |
| Symmetry, space group               | triclinic, <i>P</i> $\bar{1}$                                                 | monoclinic, <i>C2/m</i>                                                       | monoclinic, <i>C2/m</i>                                                       |
| Unit cell parameters                |                                                                               |                                                                               |                                                                               |
| <i>a</i> (Å)                        | 41.193(1)                                                                     | 69.747(19)                                                                    | 71.598(3)                                                                     |
| <i>b</i> (Å)                        | 41.026(1)                                                                     | 37.990(12)                                                                    | 41.628(2)                                                                     |
| <i>c</i> (Å)                        | 42.227(1)                                                                     | 41.139(11)                                                                    | 41.667(2)                                                                     |
| $\alpha$ , °                        | 119.58(2)                                                                     | 90                                                                            | 90                                                                            |
| $\beta$ , °                         | 119.78(3)                                                                     | 126.68(2)                                                                     | 124.99(2)                                                                     |
| $\gamma$ , °                        | 59.46(2)                                                                      | 90                                                                            | 90                                                                            |
| Unit cell volume, (Å <sup>3</sup> ) | 50493(5)                                                                      | 87419(40)                                                                     | 101740(18)                                                                    |
| Wave length (Å)                     |                                                                               | 1.5406                                                                        |                                                                               |
| <i>2θ</i> range (°)                 |                                                                               | 2 - 30                                                                        |                                                                               |
| Instrument geometry                 |                                                                               | Debye-Scherrer                                                                |                                                                               |
| Zero point line shift (°)           |                                                                               | 0                                                                             | 0                                                                             |
| Profile function                    |                                                                               | Thompson-Cox-Hastings                                                         |                                                                               |
| <i>U</i>                            | 0.02797                                                                       | 0.81789                                                                       | 0.0206                                                                        |
| <i>V</i>                            | 0.00371                                                                       | 0.03867                                                                       | 0.002                                                                         |
| <i>W</i>                            | 0.00507                                                                       | 0.00927                                                                       | 0.00447                                                                       |
| <i>X</i>                            | 0.01787                                                                       | 0.08439                                                                       | 0.08557                                                                       |
| <i>Y</i>                            | 0.00027                                                                       | -0.00141                                                                      | 0.00105                                                                       |
| Asymmetry correction                |                                                                               | Berar-Baldinozzi                                                              |                                                                               |
| <i>P1</i>                           | 0.00280                                                                       | 0.00961                                                                       | -0.00021                                                                      |
| <i>P2</i>                           | 0.00010                                                                       | -0.00022                                                                      | 0.00018                                                                       |
| <i>P3</i>                           | -0.00359                                                                      | 0.00412                                                                       | -0.00074                                                                      |
| <i>P4</i>                           | -0.00011                                                                      | 0.00005                                                                       | -0.00001                                                                      |
| Refined motion groups               |                                                                               | 42                                                                            | 70                                                                            |
| Refined degrees of freedom          |                                                                               | 252                                                                           | 388                                                                           |
| Final <i>R</i> -values              |                                                                               |                                                                               |                                                                               |
| Final <i>R</i> <sub>wp</sub> %      | 14.53                                                                         | 12.56 %                                                                       | 9.42 %                                                                        |
| Final <i>R</i> <sub>p</sub> %       | 10.83                                                                         | 8.19 %                                                                        | 6.98 %                                                                        |

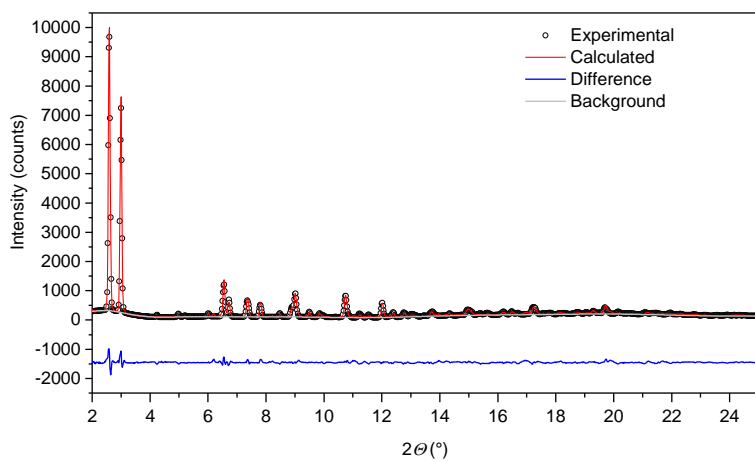

Supplementary Figure 28. Rietveld plot for DUT-151*int-act* evacuated at 273 K.

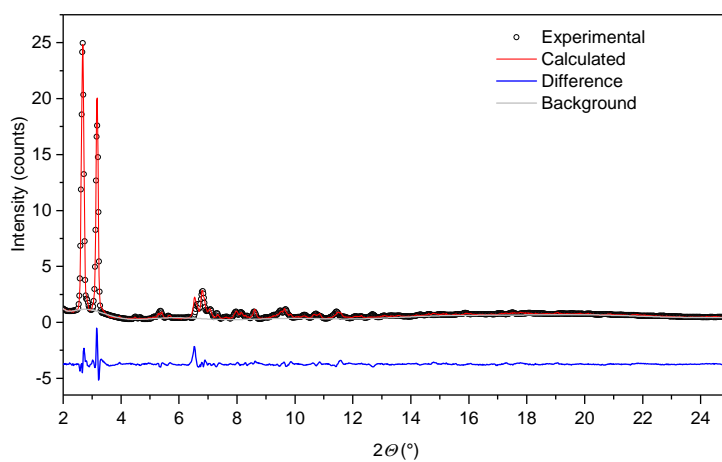

Supplementary Figure 29. Rietveld plot for DUT-151*int-cp* at 12 kPa *n*-butane adsorption at 273 K.

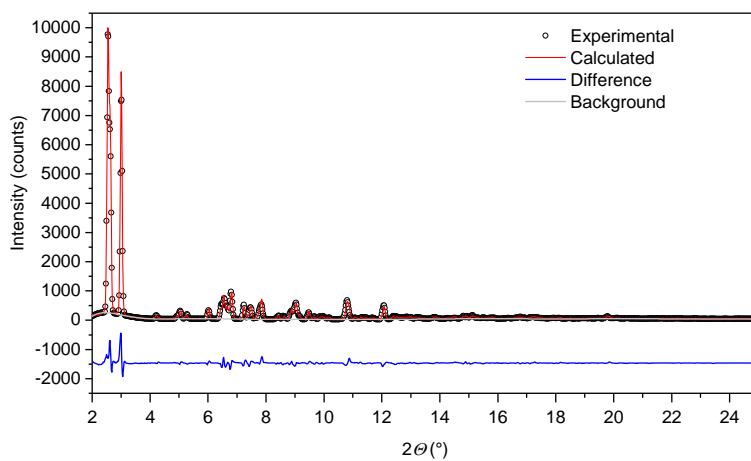

Supplementary Figure 30. Rietveld plot for DUT-151*int-op* at 60 kPa *n*-butane adsorption at 273 K.

Based on the refined structures and the single crystal structure of DUT-151*int* the structural transition in DUT-151*int* upon adsorption of *n*-butane at 273 K can be illustrated (Supplementary Figure 31).

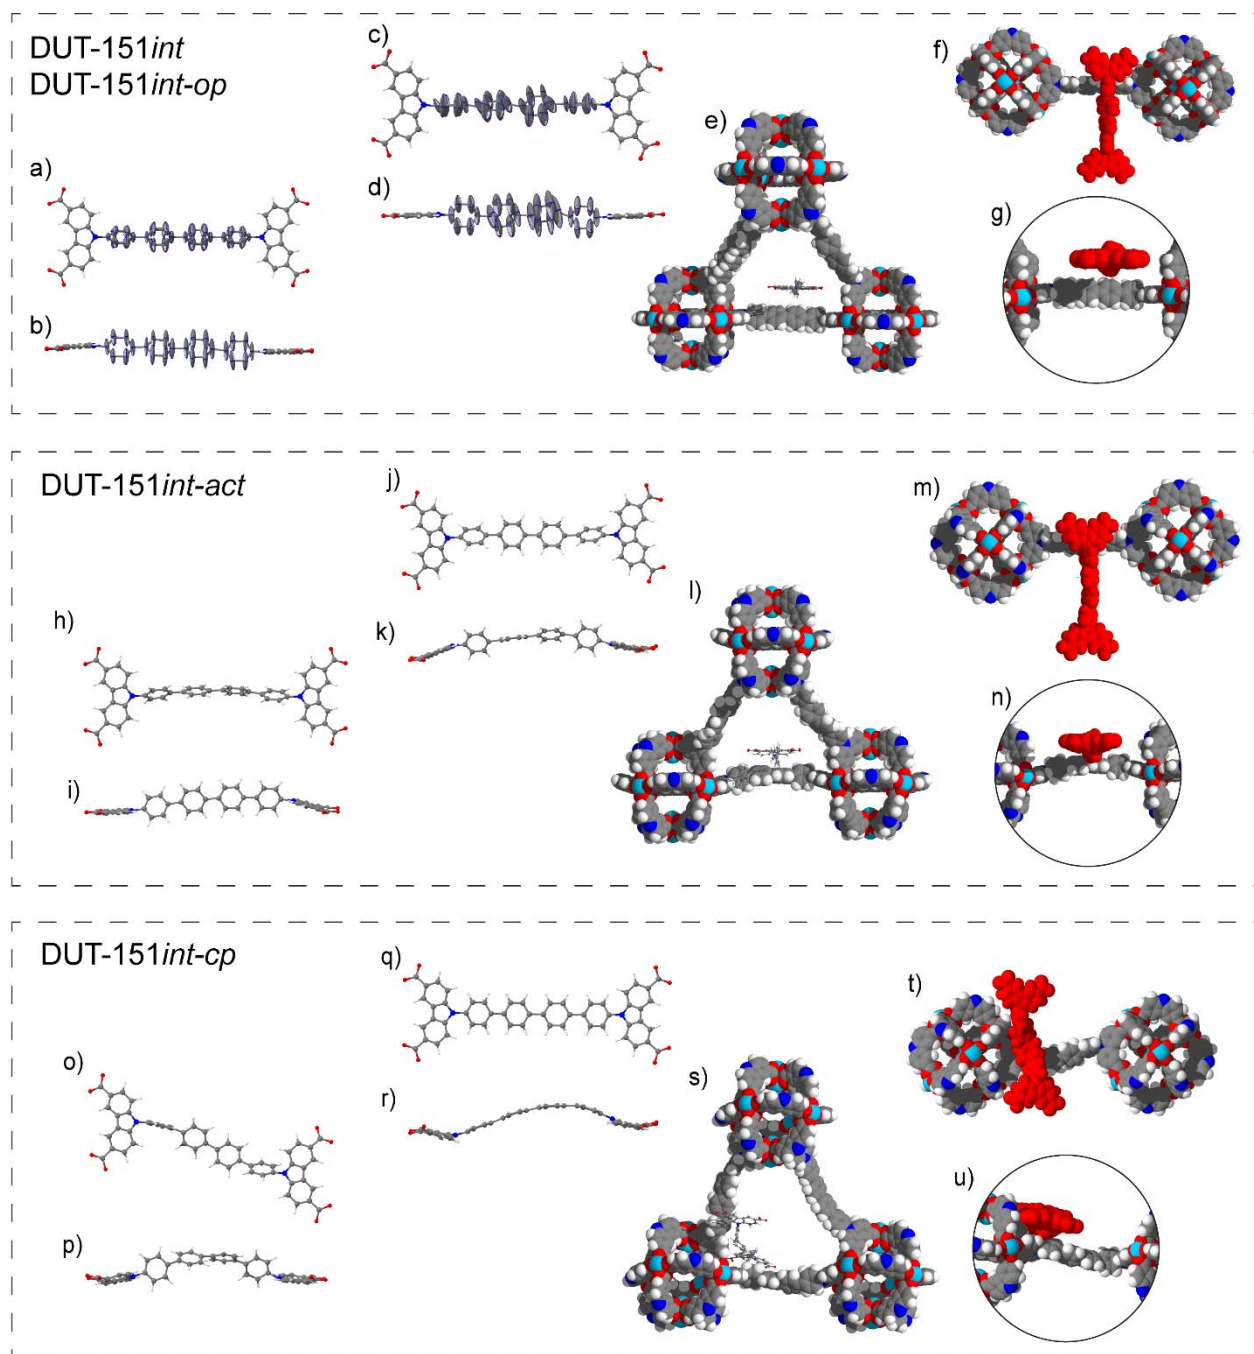

Supplementary Figure 31. a-g) single crystal structure of DUT-151*int* (which is very similar to DUT-151*int-op*), a,c) top-view and b,d) side-view of two symmetrically independent ligands including thermal ellipsoid with 50% probability of occupancy of the bridging unit, e) tetrahedral window with ligand of secondary net in red, f) top-view, g) side-view. h-n) DUT-151*int-act* h,j) top-view and i,k) side-view of two symmetrically independent ligands, l) tetrahedral window with ligand of secondary net in red, m) top-view, n) side-view. o-u) DUT-151*int-cp*, o,q) top-view and p,r) side-view of two symmetrically independent ligands, s) tetrahedral window with ligand of secondary net in red, t) top-view, u) side-view.

The symmetrically independent ligands in DUT-151*int-act* and especially in DUT-151*int-cp* are found to be deformed similar to the ligands in DUT-49*cp* although less severe. It can also be observed that the

secondary net in DUT-151*int-cp* is oriented differently, mainly due to the deformation of the ligand which results in a shrinkage of the individual nets. This crystallographic information allows to derive a structural mechanism and simulate textural properties such as pore volume and pore size distribution for the different structures in play (Supplementary Figure 74). From the PSD it is obvious that the largest pore diameter in DUT-151*int* is increased from 19 to 22 Å upon activation (DUT-151*int-act*) while maintaining a specific pore volume of 1.09 cm<sup>3</sup> g<sup>-1</sup>. The increase in pore diameter can be explained by interframework dynamics in which the interframework distance is reduced due to dispersive interactions. In contrast, the difference in pore volume between DUT-151*int-op* and *-cp* is 0.32 cm<sup>3</sup> g<sup>-1</sup>, less than 20 % compared with DUT-49 and 50 and in the range of the simulated transitions of DUT-48. Thus, the absence of NGA can be explained by the lack of difference in adsorption energetics and large activation barriers previously derived for DUT-48. The crystallographic analysis can also be set in context to the free energy profiles simulated for DUT-151*int* (Figure 2). A flat slope in the region of 175,000 Å<sup>3</sup> indicates the presence of slightly stabilized structures in this range of this unit cell volume. This value is in line with the experimentally observed unit cell volume of DUT-151*int-cp* that needs to be doubled to compare the experimentally obtained structures to the proposed models yielding a unit cell volume of 174,838 Å<sup>3</sup>. The absence of NGA under any of the various adsorption conditions indicates that the structural contraction in DUT-151*int* lacks the metastable character well reflected by simulations of the free energy profile and absence of ligand buckling. Upon contraction, a certain degree of interframework dynamics and bending of the ligands occurs in DUT-151*int*. However, no tilting or concerted rotation of the MOPs is observed - in strong contrast to contraction transitions in DUT-49. The lower degree of ligand deformation and lower extent of reduction in pore volume are the reason for the absence of NGA, however they also enable the reversibility of the transition. Although the structural transition upon adsorption of *n*-butane in DUT-151*int* is well investigated, isotherms recorded using methane and argon show multiple steps and hysteresis that suggest a more complex structural transition compared to the observations made upon adsorption of *n*-butane. The observed structural flexibility in DUT-151*int* presents a unique example of both ligand deformation and interframework dynamics. In conclusion interpenetration is suggested to suppress contraction and NGA for this topology, however, this remains untested experimentally for a non-interpenetrated DUT-151 material.

## Supplementary Note 8: Parallelised neutron powder diffraction (NPD) and methane( $\text{CD}_4$ )-adsorption studies of microcrystalline MOF powders

*In situ* NPD experiments were conducted at neutron powder diffractometer E9-FIREPOD at the BER II neutron source of the Helmholtz Zentrum Berlin<sup>34</sup> using incoming neutrons with wavelength  $\lambda = 2.8172(2)$  Å. A cylindrically-shaped aluminium sample holder with inner diameter of 1 cm and length of 12 cm was filled and sealed under argon atmosphere with 130, 115, and 95 mg of DUT-48, -49, -50, respectively. The sample holder was connected to a gas handling system via a stainless-steel capillary that allowed controlled dosing of methane in the pressure range of 0.001 – 200 kPa with a home-made apparatus. The sample was cooled by a closed cycle helium cryostat system and the temperature was monitored directly at the sample cell with a Lakeshore temperature controller with accuracy of 0.1 K. Prior to the NPD measurement the samples were outgassed in dynamic vacuum ( $< 0.1$  Pa) at 298 K for at least 1 h. Afterwards the samples were cooled to 111 K and diffractograms of the guest-free evacuated MOFs were recorded. Based on the  $\text{CH}_4$  isotherms at 111 K, pressures were selected to achieve different loadings of  $\text{CD}_4$ . Selected loadings/pressures are displayed in Supplementary Figure 32.

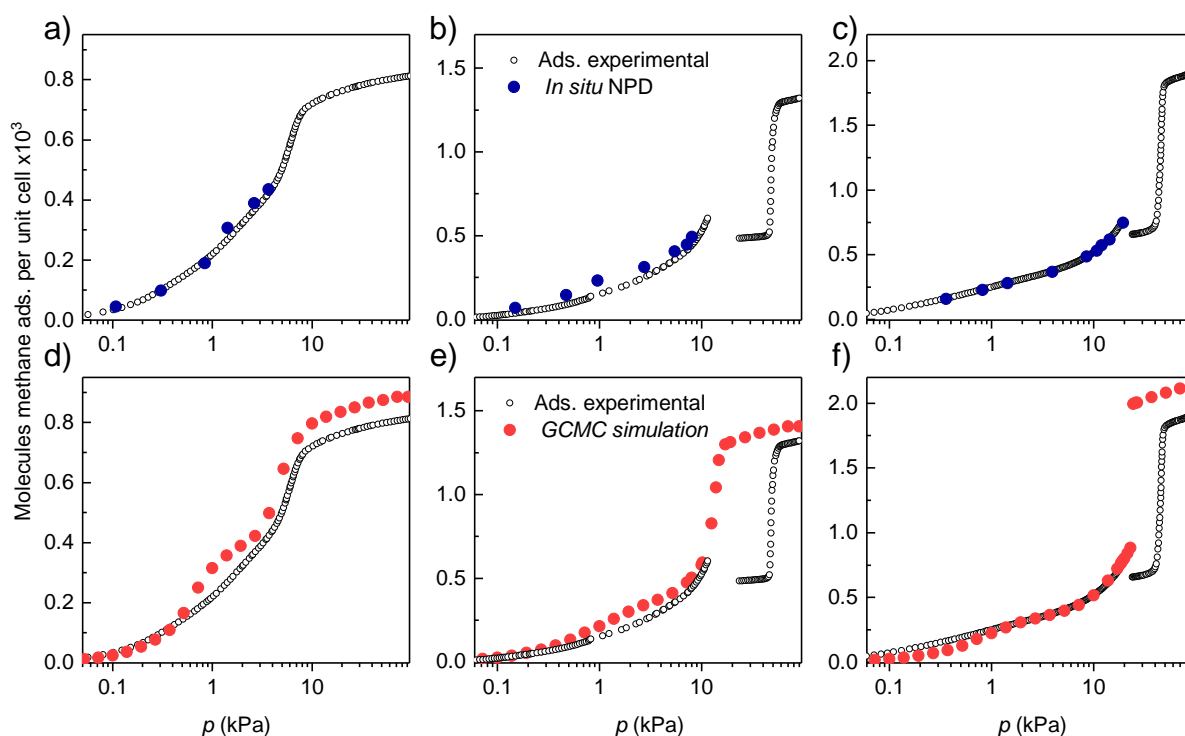

Supplementary Figure 32. Experimental volumetric methane adsorption isotherms at 111 K (open symbols) in comparison to a-c) loadings investigated by NPD (blue) and d-f) GCMC simulations (red) of a,d) DUT-48, b,e) DUT-49 c,f) DUT-50.

Due to the high porosity and large sample amount  $\text{CD}_4$  was dosed stepwise to reach the desired loadings without the need of removing  $\text{CD}_4$  via evacuation in the case of overdosing. The adsorbed amount of the sample was monitored in parallel by the gas dosing system and showed good agreement with the *ex situ*  $\text{CH}_4$  isotherms. Higher loadings required multiple dosing steps and an accurate determination of the

loading by the connected gas dosing system was not possible. The loadings of CD<sub>4</sub> were thus determined on the basis of the *ex situ* isotherms and loadings monitored during the *in situ* experiment. Before recording NPD patterns of CD<sub>4</sub>-loaded MOFs, the samples were equilibrated for at least 20 min until the change in pressure was below 1% over 5 min. NPD patterns were recorded in 4-9 scans with 1 - 2.5 h per scan. The detector signals were integrated and calibrated by the in-house Bean software. The final patterns of each loading were obtained by adding the individual scans to obtain good statistics. The obtained patterns for each scan were compared and only summarized to a single pattern if they were identical. For each final pattern, the measuring time and number of scans was selected until the intensity of the main reflection showed at least 10000 counts. Patterns of the evacuated samples with poor scattering were only measured up to 5000 counts. The Al-sample holder shows two reflections at 75 ° and 89 ° which were used as an internal standard to normalize the patterns and monitor the increase of intensity of the main reflections in the range of 4 - 20°. These two peaks of the sample holder were omitted from the Rietveld refinement but are shown for clarity in the difference Rietveld plots.

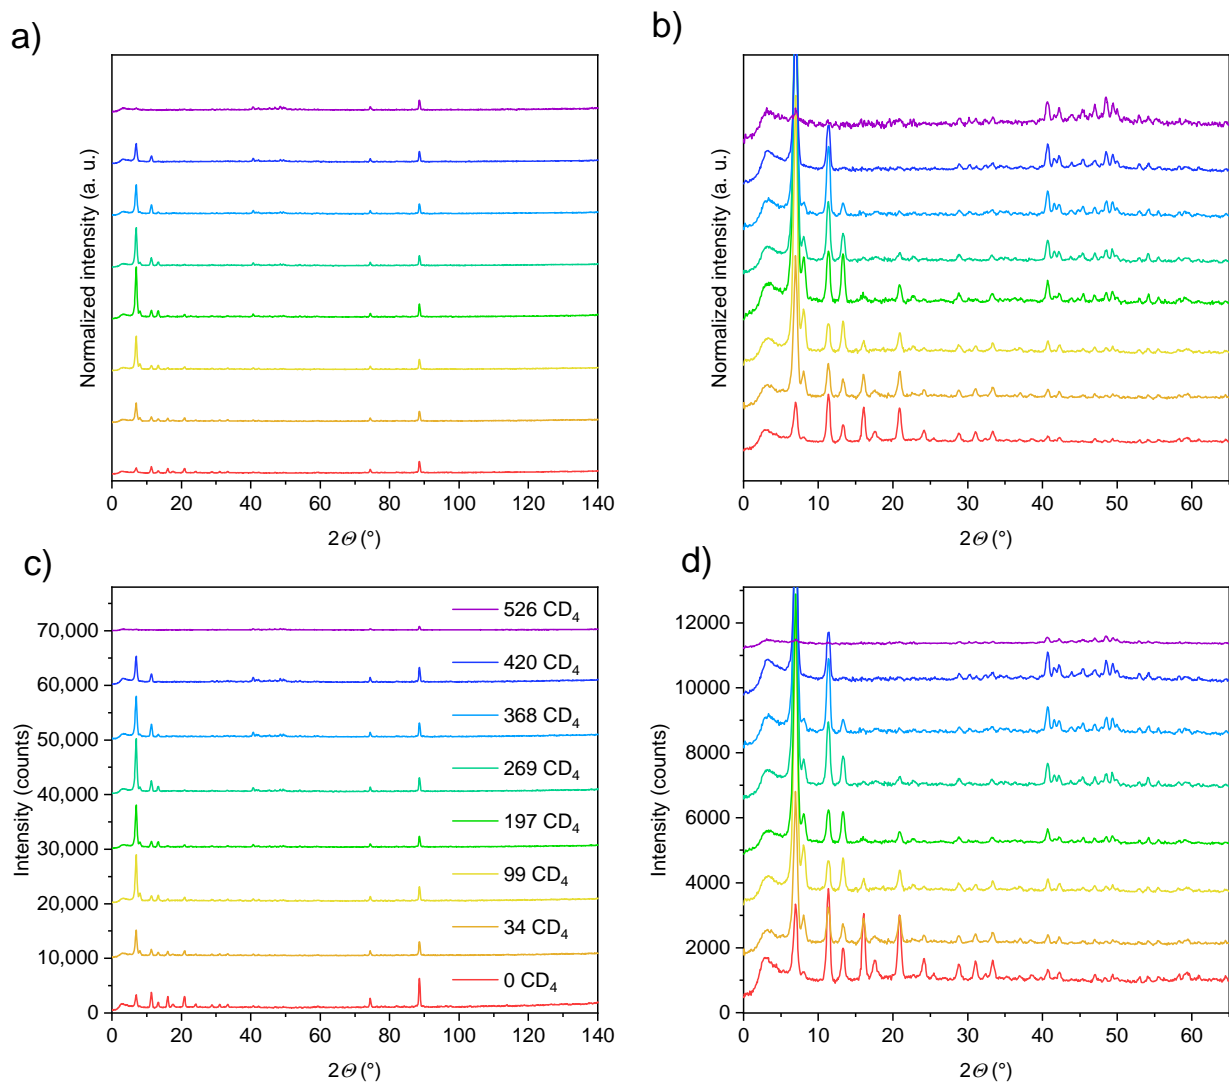

Supplementary Figure 33. NPD patterns for varying loadings with CD<sub>4</sub> in DUT-48: a) normalized NPD patterns with b) magnification of small angle area. c) NPD in absolute scale, and d) magnification of small angle area.

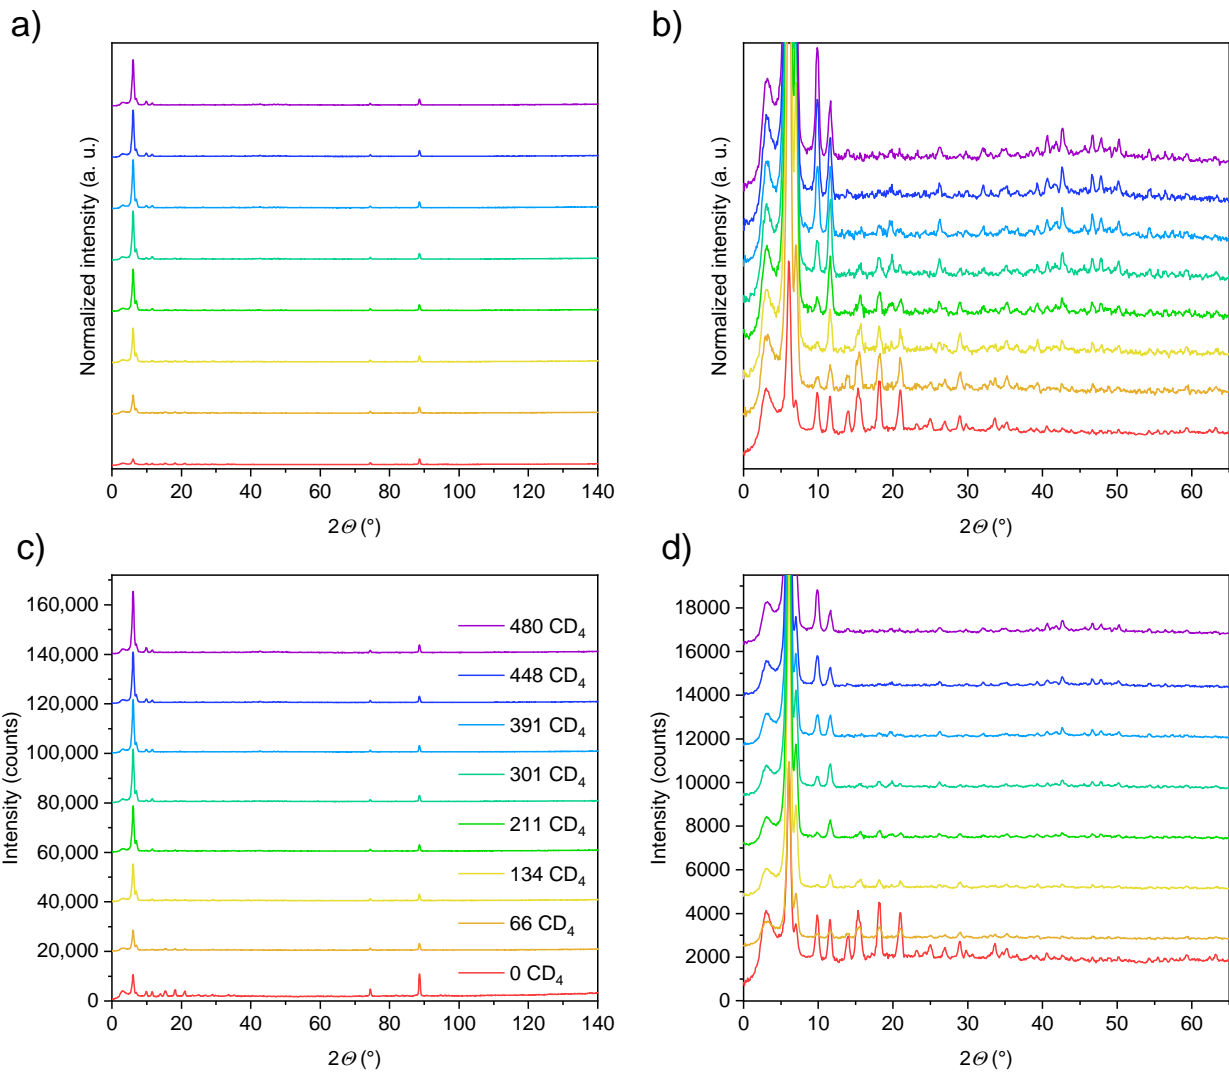

Supplementary Figure 34. NPD patterns for varying loadings with CD<sub>4</sub> in DUT-49: a) normalized NPD patterns with b) magnification of small angle area. c) NPD in absolute scale, and d) magnification of small angle area.



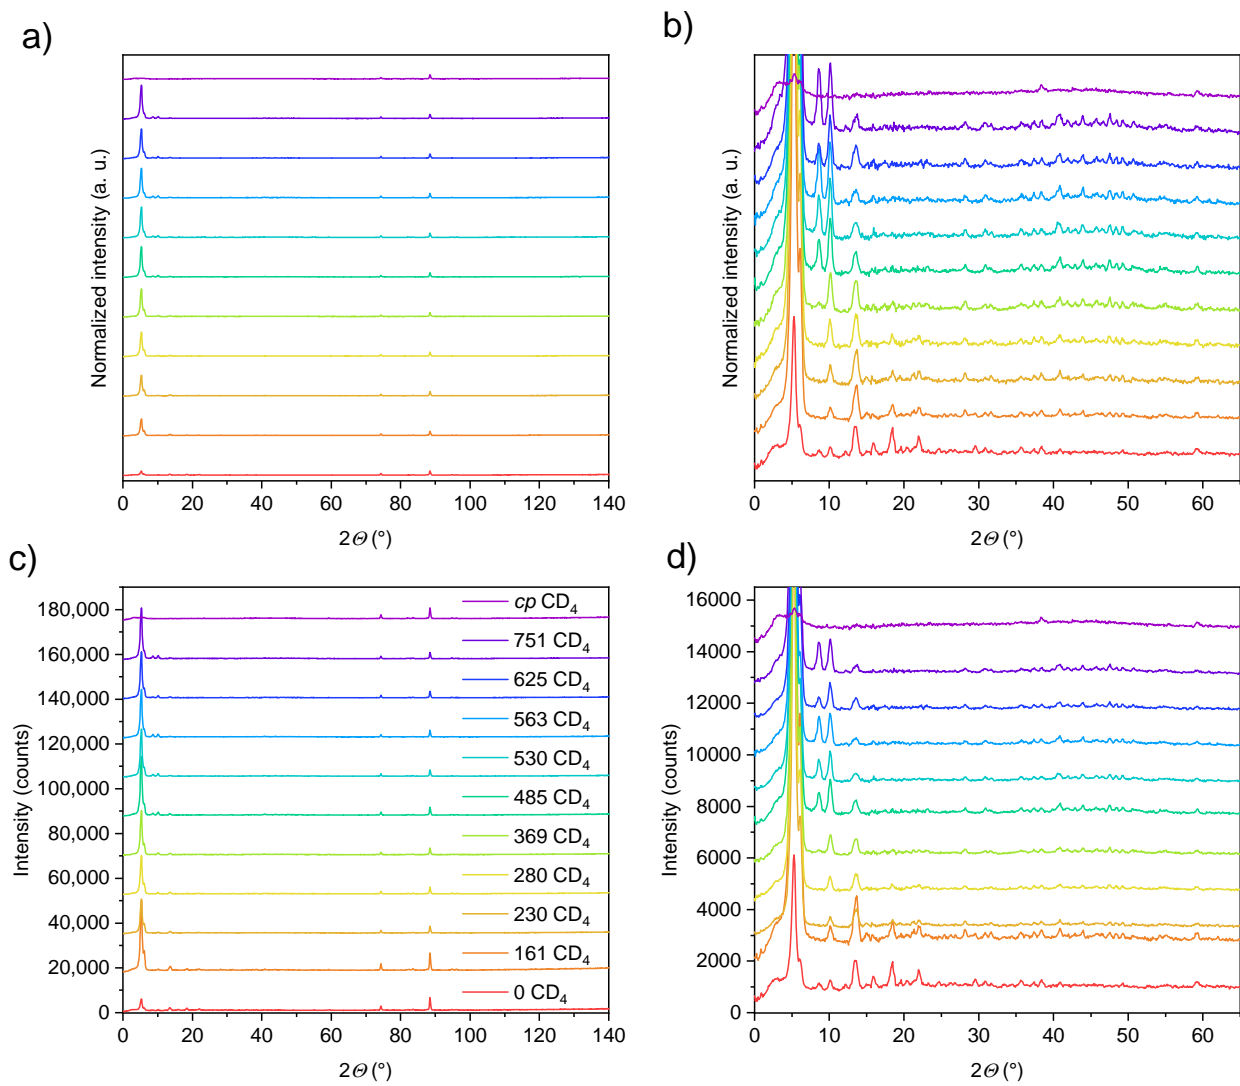

Supplementary Figure 35. NPD patterns for varying loadings with CD<sub>4</sub> in DUT-50: a) normalized NPD patterns with b) magnification of small angle area. c) NPD in absolute scale, and d) magnification of small angle area.

The obtained patterns for DUT-48, 49 and 50 are summarized in Supplementary Figure 33 and were analyzed by Rietveld refinement using FullProf<sup>35</sup>. Positions and distribution of CD<sub>4</sub> molecules within the unit cell of DUT-48, -49, and -50 were identified using Rietveld refinement in analogy to a recent study on CD<sub>4</sub> adsorption in HKUST-1<sup>36</sup>. The guest free single crystal structures of DUT-48, -49, and -50 described in Supplementary Table 4 were used as a structural template of the refinement. The oxygen atoms which belong to solvent or water molecules coordinated to the copper paddle-wheels were removed as they are not present in the fully activated MOF. The pseudo-Voigt function with axial divergence (implemented function 12 of FullProf) was used for profile description. Lattice parameters are refined with fixed atom positions of the framework. CD<sub>4</sub> molecules are treated as rigid groups with tetrahedral shape with C-D bond length of 0.999 Å<sup>36</sup>. For the refinement of CD<sub>4</sub> positions, the experimentally obtained amount of adsorbed CD<sub>4</sub> was introduced at random positions in the unit cell. Within the refinement, the positions of the CD<sub>4</sub> molecules were refined first. In a second step restriction of translation and rotation of CD<sub>4</sub> were applied to the methane molecules with fixed fractional occupancy of the refined positions. After validating these refinements of the positions further refinement of the fractional occupancy was performed with a fixed scale factor.<sup>36</sup> Occupancies of C and D atoms in the CD<sub>4</sub> molecules were assumed to be identical. For each obtained NPD pattern, several refinements were performed starting with slight variations of loading and positions of CD<sub>4</sub>. The final refinements of fractional coordinates and occupancies for both, the host lattice and adsorbed CD<sub>4</sub> molecules including background and profile coefficients yielded good agreement with the experimental data. The Rietveld plots, reliability factors, refined amount of loading, fractional coordinates of framework and CD<sub>4</sub> molecules, and lattice parameters are summarized in Supplementary Figure 36 -Supplementary Figure 41, Supplementary Table 16, Supplementary Table 19 (DUT-48), Supplementary Figure 42, Supplementary Figure 48, Supplementary Table 20, Supplementary Table 23 (DUT-49), Supplementary Figure 49, Supplementary Figure 57, Supplementary Table 24, Supplementary Table 27 (DUT-50). Crystallographic files for the refined structures are accessible as Supplementary Data 2.

An intrinsic problem of the performed experiments and refinements is the decreased scattering density caused by the high mobility of methane molecules within the pores. Especially at lower loadings CD<sub>4</sub> is more dispersed and exhibits little interactions with other methane molecules, hence occupancies of methane at the pore walls were found below 0.4. Thus, the positions refined only reflect preferential adsorption sites but the methane molecule is not immobilized at this position of the host framework. To reduce the delocalization of methane within the pores, *in situ* NPD experiments with CD<sub>4</sub> adsorption in MOFs are typically performed at low temperature (77 - 4 K)<sup>36-38</sup> to fix the methane molecules within the pores. Ideally, this will cause immobilization of methane within the pores reflected by refinements of CD<sub>4</sub> positions with high occupancy up to 1 even at lower loadings. However, experiments performed on methane adsorption in ZIF-8 and MOF-5 in the range of 80-3.5 K<sup>38</sup> demonstrate, that a phase transition of the fluid at around 60 K occurs. At higher temperatures the adsorption process is found to be different from the adsorption sites at lower temperature. This temperature dependency of the adsorption process was further supported by computational analysis in MOF-5<sup>39</sup>. Consequently, experiments at lower adsorption temperature might yield better refinement of adsorption sites but do not necessarily reflect

adsorption sites and mechanism relevant for NGA at intermediate temperatures. The goal of this study was to investigate the adsorption behaviour at 111 K where NGA occurs and thus application of a lower temperature, although fundamentally interesting, would not reflect the conditions of interest for this study. Although this rather high temperature limits the localization of methane adsorption sites, the changes in diffraction intensities show that CD<sub>4</sub> is partly immobilized within the framework especially at higher loadings and consequently gives insights into the adsorption mechanism. Validation of these experimental results by GCMC simulations further supports the findings. Conditions of other *in situ* crystallographic experiments performed in parallel to adsorption of gases on various MOF materials are summarized in an article by Brammer and co-workers<sup>40</sup> and help to set the experiments described in this study in context.

For each refinement of DUT-48, the Rietveld plots are summarized in Supplementary Figure 36 - Supplementary Figure 41, and R-values, refined amount of loading, fractional coordinates of framework and CD<sub>4</sub> molecules, and lattice parameters are summarized in the following.

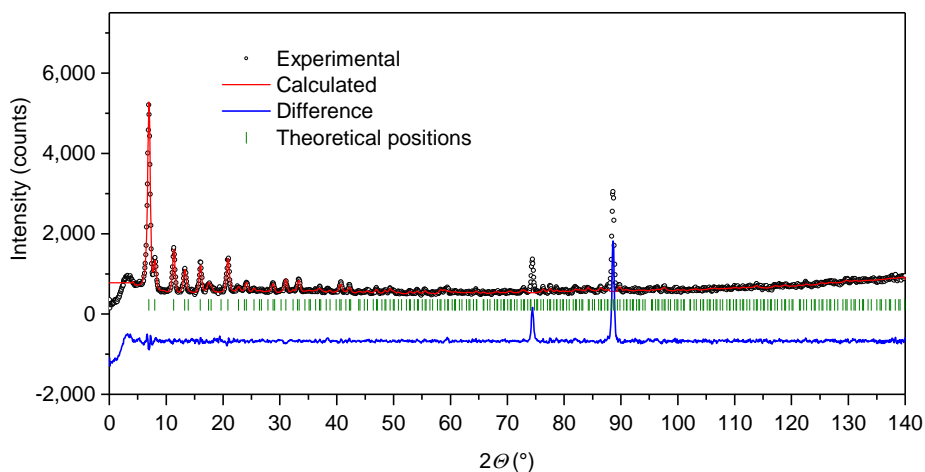

Supplementary Figure 36. Rietveld plot of DUT-48 with a loading of 45 CD<sub>4</sub> molecules per unit cell at 111 K.

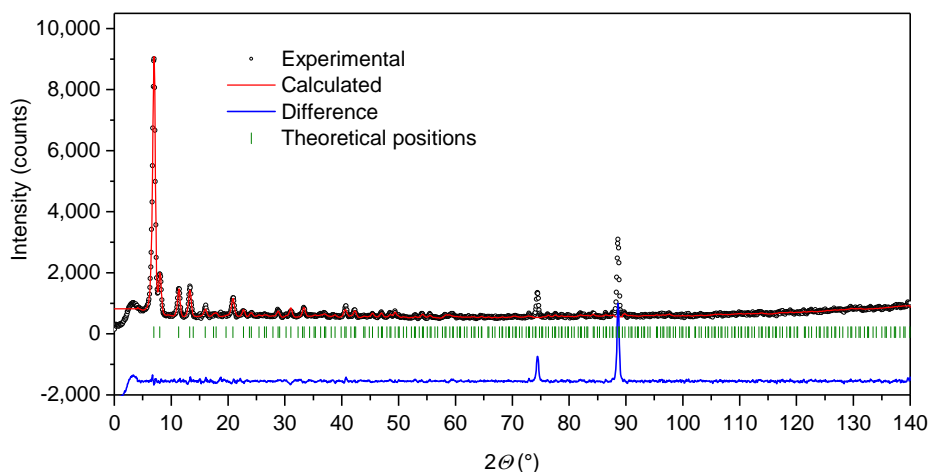

Supplementary Figure 37. Rietveld plot of DUT-48 with a loading of 99 CD<sub>4</sub> molecules per unit cell at 111 K.

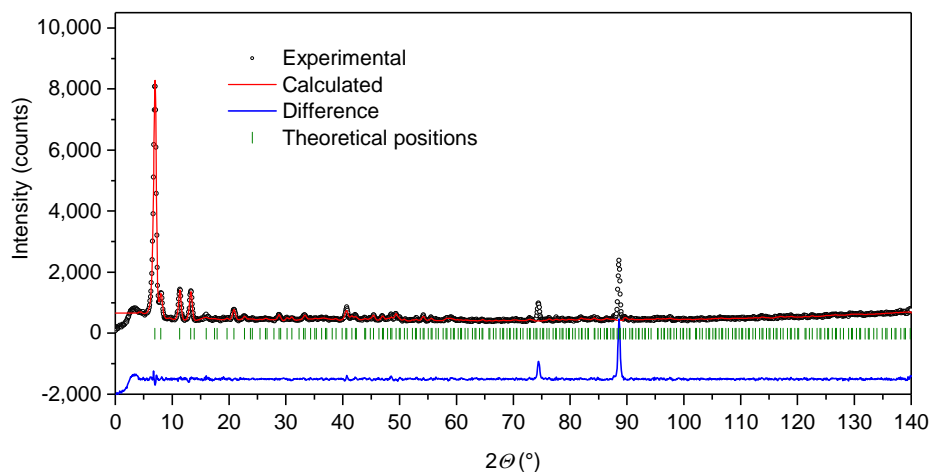

Supplementary Figure 38. Rietveld plot of DUT-48 with a loading of 189 CD<sub>4</sub> molecules per unit cell at 111 K.

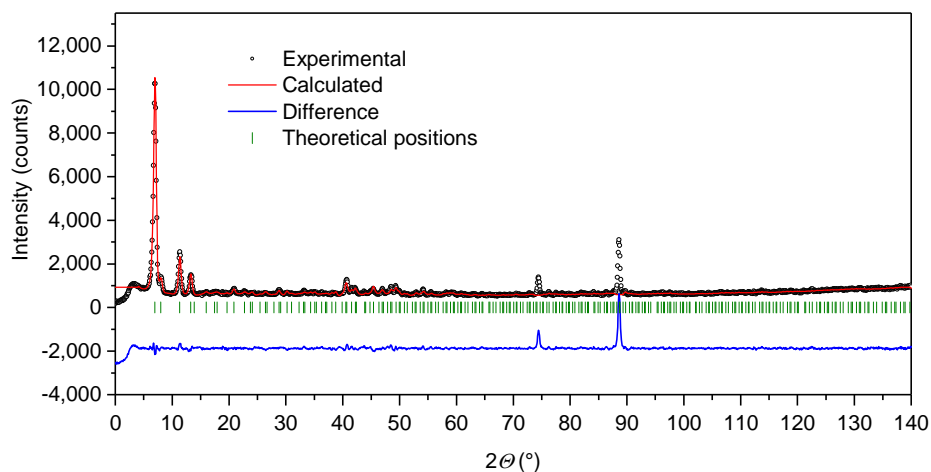

Supplementary Figure 39. Rietveld plot of DUT-48 with a loading of 306 CD<sub>4</sub> molecules per unit cell at 111 K.

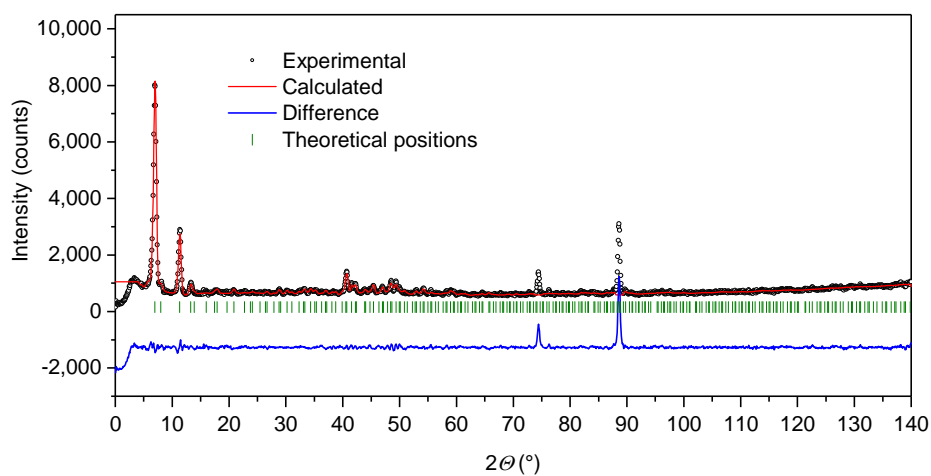

Supplementary Figure 40. Rietveld plot of DUT-48 with a loading of 389 CD<sub>4</sub> molecules per unit cell at 111 K.

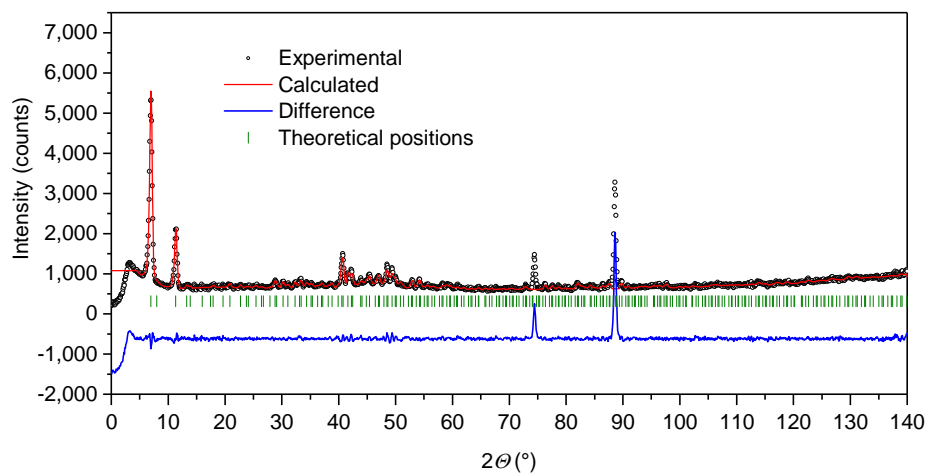

Supplementary Figure 41. Rietveld plot of DUT-48 with a loading of 435 CD<sub>4</sub> molecules per unit cell at 111 K.

Supplementary Table 16. Crystallographic information for DUT-48.

|                                      |                                                                                                       |
|--------------------------------------|-------------------------------------------------------------------------------------------------------|
| Material ID                          | DUT-48                                                                                                |
| Chemical formula, weight             | $\text{Cu}_2\text{O}_8\text{C}_{34}\text{H}_{16}\text{N}_2$ , 707.6 g mol <sup>-1</sup>               |
| Empirical formula, weight            | $\text{Cu}_{48}\text{O}_{192}\text{C}_{960}\text{H}_{480}\text{N}_{48}$ , 16982.4 g mol <sup>-1</sup> |
| Temperature                          | 111 K                                                                                                 |
| Wavelength                           | Neutrons; 2.8172(2) Å                                                                                 |
| Measurement system                   | E9-FIREPOD at the BER II neutron source, Helmholtz Zentrum Berlin                                     |
| Crystal system                       | Cubic                                                                                                 |
| Space group                          | $Fm\bar{3}m$ (No. 225)                                                                                |
| Unit cell dimensions                 | 40.4365(15) Å                                                                                         |
| Volume                               | 66118(4) Å <sup>3</sup>                                                                               |
| Z                                    | 24                                                                                                    |
| Density                              | 0.426 g cm <sup>-3</sup>                                                                              |
| 2 $\theta$ range for data collection | -9.40873 ° – 141.79128 °                                                                              |
| 2 $\theta$ resolution                | 0.075 °                                                                                               |
| No. of data points                   | 2017                                                                                                  |
| Refinement method, program           | Rietveld L.S. refinement, Full Prof                                                                   |

Supplementary Table 17. Lattice and profile parameters for Rietveld refinements of CD<sub>4</sub> loaded DUT-48.

| Suppl. Figure                                             | $a$ (Å)     | $R_p$ | $R_{wp}$ | $R_{exp}$ | $\chi^2$ | R-Bragg | CD <sub>4</sub> per UC exp. | CD <sub>4</sub> per UC refined |
|-----------------------------------------------------------|-------------|-------|----------|-----------|----------|---------|-----------------------------|--------------------------------|
| Supplementary Figure 36                                   | 40.435(2)   | 3.29  | 4.20     | 3.80      | 1.22     | 4.88    | 34                          | 45                             |
| Supplementary Figure 37                                   | 40.436(3)   | 3.32  | 4.35     | 3.72      | 1.37     | 4.17    | 99                          | 99                             |
| Supplementary Figure 38                                   | 40.446(2)   | 3.40  | 4.38     | 4.20      | 1.09     | 4.19    | 197                         | 189                            |
| Supplementary Figure 39                                   | 40.453(3)   | 3.68  | 4.80     | 3.59      | 1.79     | 4.20    | 269                         | 306                            |
| Supplementary Figure 40                                   | 40.450(2)   | 3.57  | 4.65     | 3.55      | 1.71     | 4.77    | 368                         | 389                            |
| Supplementary Figure 41                                   | 40.4365(16) | 3.03  | 3.81     | 3.52      | 1.18     | 6.97    | 420                         | 435                            |
| No refinement possible due to low diffraction intensities |             |       |          |           |          |         | 526                         | n.a.                           |

Supplementary Table 18. Fractional coordinates of asymmetric unit in guest free DUT-48.

| Atom-ID | Atom | Coordinates |         |         | $U_{iso}$ | Occupancy |
|---------|------|-------------|---------|---------|-----------|-----------|
|         |      | $x$         | $y$     | $z$     |           |           |
| CuA     | Cu   | 0.00000     | 0.00000 | 0.17184 | 0.01299   | 1.00000   |
| CuB     | Cu   | 0.00000     | 0.00000 | 0.23683 | 0.01299   | 1.00000   |
| OA      | O    | 0.00000     | 0.04849 | 0.17676 | 0.01316   | 1.00000   |
| OB      | O    | 0.00000     | 0.04828 | 0.23210 | 0.01316   | 1.00000   |
| NA      | N    | 0.00000     | 0.20092 | 0.20092 | 0.01316   | 1.00000   |
| CA      | C    | 0.00000     | 0.06252 | 0.20440 | 0.01408   | 1.00000   |
| CB      | C    | 0.00000     | 0.09904 | 0.20453 | 0.01408   | 1.00000   |
| CC      | C    | 0.00000     | 0.11628 | 0.23485 | 0.01408   | 1.00000   |
| HCA     | H    | 0.00000     | 0.10430 | 0.25440 | 0.04711   | 1.00000   |
| CD      | C    | 0.00000     | 0.15016 | 0.23632 | 0.01408   | 1.00000   |
| HDA     | H    | 0.00000     | 0.16120 | 0.25640 | 0.04711   | 1.00000   |
| CE      | C    | 0.00000     | 0.16728 | 0.20660 | 0.01408   | 1.00000   |
| CF      | C    | 0.00000     | 0.15079 | 0.17610 | 0.01408   | 1.00000   |
| CG      | C    | 0.00000     | 0.11657 | 0.17520 | 0.01408   | 1.00000   |
| HGA     | H    | 0.00000     | 0.10550 | 0.15510 | 0.04711   | 1.00000   |
| CH      | C    | 0.00000     | 0.22608 | 0.22608 | 0.01408   | 1.00000   |
| CI      | C    | 0.02412     | 0.24912 | 0.22658 | 0.01408   | 0.50000   |
| HIA     | H    | 0.04070     | 0.24870 | 0.21070 | 0.04713   | 0.50000   |
| HIA     | H    | 0.04070     | 0.24870 | 0.21070 | 0.04713   | 0.50000   |

Supplementary Table 19. Fractional coordinates of CD<sub>4</sub> molecules in DUT-48 at varied loadings.

| CD <sub>4</sub> per UC | Atom-ID | Atom | <i>X</i> | <i>y</i> | <i>z</i> | <i>U</i> <sub>iso</sub> | Occupancy |
|------------------------|---------|------|----------|----------|----------|-------------------------|-----------|
| 45                     | AD1     | C    | 0.00000  | 0.04235  | 0.09175  | 0.01408                 | 0.1821(4) |
| 45                     | BD1     | C    | 0.09237  | 0.09237  | 0.15638  | 0.01408                 | 0.2841(6) |
| 99                     | AD1     | C    | 0.00000  | 0.04665  | 0.08156  | 0.01408                 | 0.255(7)  |
| 99                     | BD1     | C    | 0.08911  | 0.08911  | 0.16049  | 0.01408                 | 0.773(14) |
| 189                    | AD1     | C    | 0.08792  | 0.08792  | 0.15818  | 0.01408                 | 0.85(2)   |
| 189                    | BD1     | C    | 0.09444  | 0.09444  | 0.24697  | 0.01408                 | 0.50(2)   |
| 189                    | CD1     | C    | 0.07189  | 0.07189  | 0.00000  | 0.01408                 | 0.644(17) |
| 189                    | DD1     | C    | 0.17883  | 0.17883  | 0.08643  | 0.01408                 | 0.30(2)   |
| 306                    | AD1     | C    | 0.09571  | 0.09571  | 0.16643  | 0.01408                 | 1.00000   |
| 306                    | BD1     | C    | 0.07523  | 0.07523  | 0.26657  | 0.01408                 | 1.00000   |
| 306                    | CD1     | C    | 0.07822  | 0.07822  | 0.00000  | 0.01408                 | 1.00000   |
| 306                    | DD1     | C    | 0.20002  | 0.20002  | 0.09155  | 0.01408                 | 0.69(2)   |
| 389                    | AD1     | C    | 0.09354  | 0.09354  | 0.17899  | 0.01408                 | 0.721(20) |
| 389                    | BD1     | C    | 0.08081  | 0.08081  | 0.26427  | 0.01408                 | 0.65(2)   |
| 389                    | CD1     | C    | 0.10955  | 0.32467  | 0.21599  | 0.01408                 | 0.338(13) |
| 389                    | DD1     | C    | 0.17104  | 0.17104  | 0.53480  | 0.01408                 | 0.596(20) |
| 389                    | ED1     | C    | 0.19243  | 0.19243  | 0.10024  | 0.01408                 | 0.91(2)   |
| 389                    | FD1     | C    | 0.08635  | 0.08635  | 0.00000  | 0.01408                 | 1.000(12) |
| 435                    | AD1     | C    | 0.09117  | 0.09117  | 0.16207  | 0.01408                 | 0.87(3)   |
| 435                    | BD1     | C    | 0.07462  | 0.07462  | 0.30334  | 0.01408                 | 0.57(4)   |
| 435                    | CD1     | C    | 0.21012  | 0.21011  | 0.40755  | 0.01408                 | 0.57(3)   |
| 435                    | DD1     | C    | 0.16780  | 0.16780  | 0.46469  | 0.01408                 | 0.48(3)   |
| 435                    | ED1     | C    | 0.19111  | 0.19111  | 0.10157  | 0.01408                 | 0.91(3)   |

Recently, Rowland *et al.* presented *in situ* NPD analysis of CD<sub>4</sub> adsorption in PCN-81<sup>3</sup> previously demonstrated as isostructural to DUT-48. In their work the authors used the synthesis and activation procedure described by Zhou and co-workers<sup>4</sup>. The NPD experiments were performed at 7 K and the lower *Pa* $\bar{3}$  symmetry refined for PCN-81 was used for Rietveld refinement of the obtained NPD pattern to obtain primary adsorption sites of methane within the porous structure of PCN-81. Loadings of 48, 92, 192 CD<sub>4</sub> molecules per unit cell were analysed only covering the low-pressure region of the adsorption isotherm. Their report supports the findings of the present study on DUT-48 in which only open metal sites and the cub voids are filled with methane at these low loadings.



For each refinement of DUT-49, the Rietveld plots are summarized in Supplementary Figure 42-  
Supplementary Figure 48, and R-values, refined amount of loading, fractional coordinates of framework  
and CD<sub>4</sub> molecules, and lattice parameters are summarized in the following.

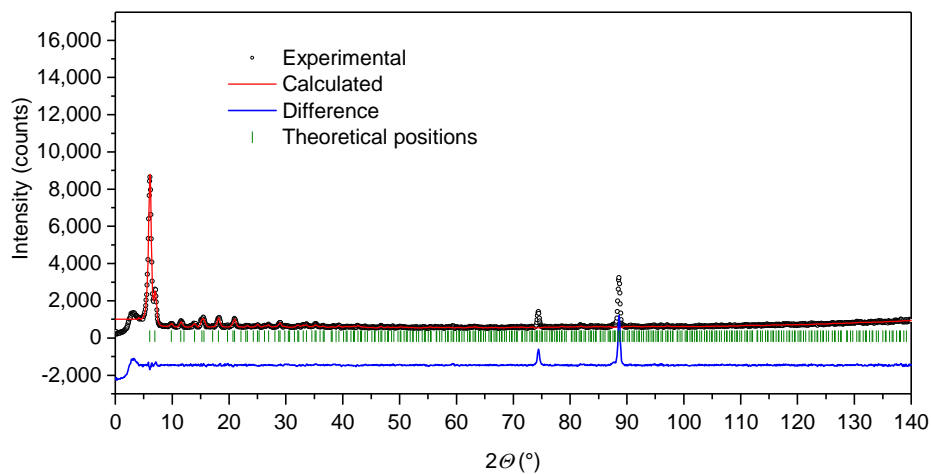

Supplementary Figure 42. Rietveld plot of DUT-49 with a loading of 68 CD<sub>4</sub> molecules per unit cell at 111 K.

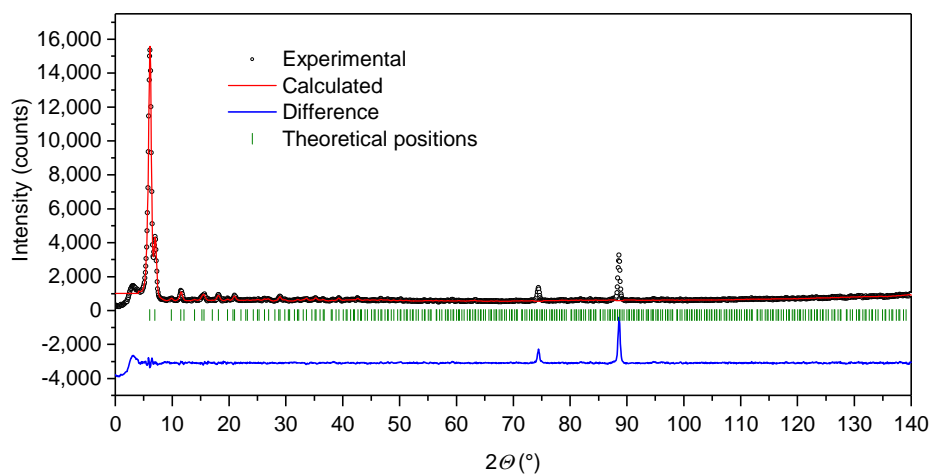

Supplementary Figure 43. Rietveld plot of DUT-49 with a loading of 145.5 CD<sub>4</sub> molecules per unit cell at 111 K.

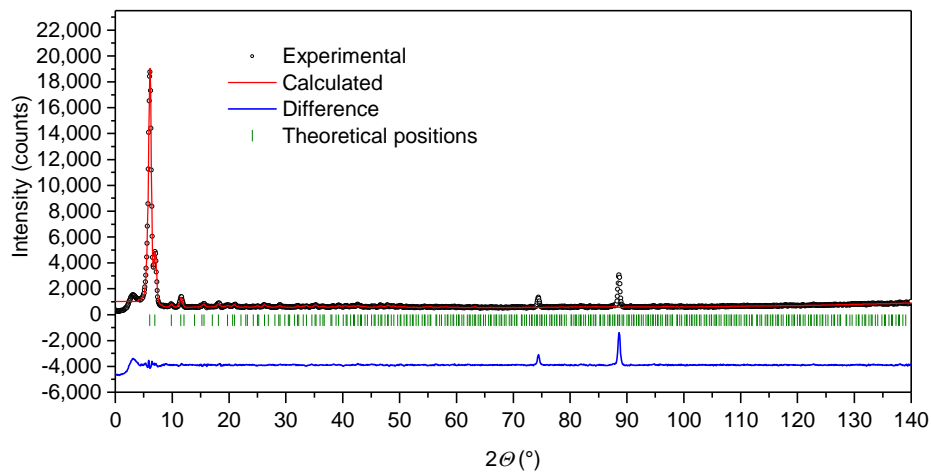

Supplementary Figure 44. Rietveld plot of DUT-49 with a loading of 231 CD<sub>4</sub> molecules per unit cell at 111 K.

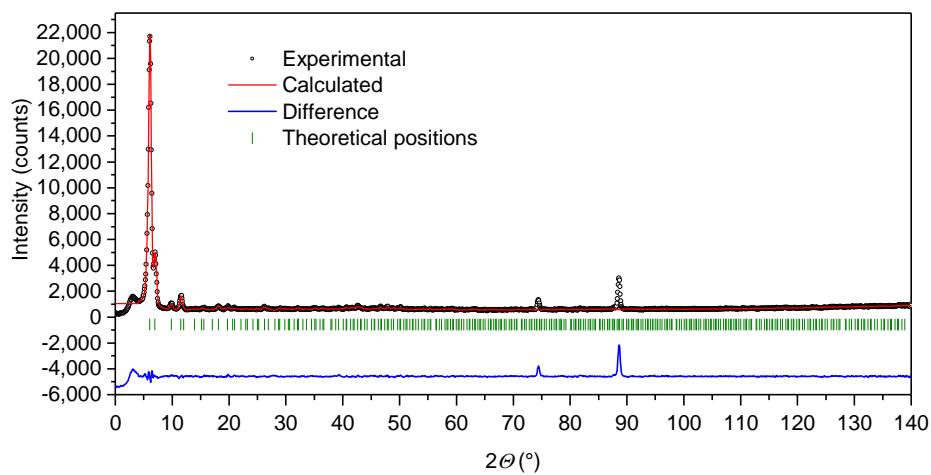

Supplementary Figure 45. Rietveld plot of DUT-49 with a loading of 311 CD<sub>4</sub> molecules per unit cell at 111 K.

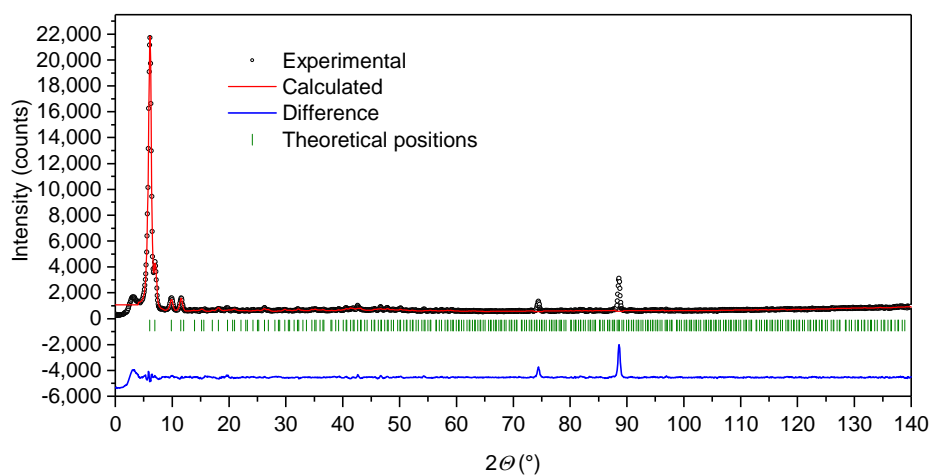

Supplementary Figure 46. Rietveld plot of DUT-49 with a loading of 405 CD<sub>4</sub> molecules per unit cell at 111 K.

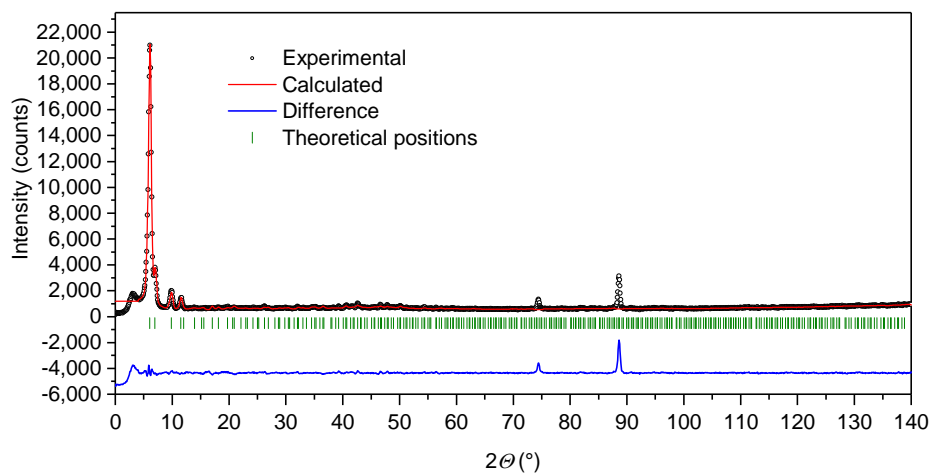

Supplementary Figure 47. Rietveld plot of DUT-49 with a loading of 446.5 CD<sub>4</sub> molecules per unit cell at 111 K.

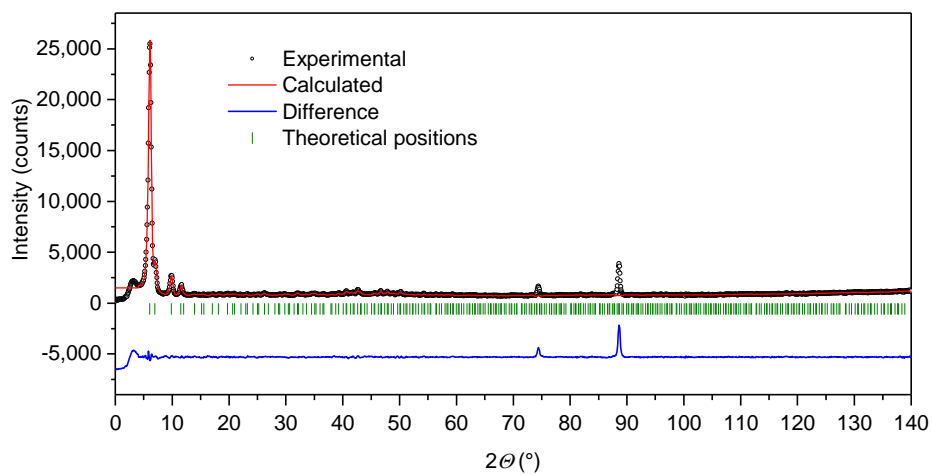

Supplementary Figure 48. Rietveld plot of DUT-49 with a loading of 492 CD<sub>4</sub> molecules per unit cell at 111 K.

Supplementary Table 20. Crystallographic information for DUT-49.

|                                      |                                                                                                       |
|--------------------------------------|-------------------------------------------------------------------------------------------------------|
| Material ID                          | DUT-49                                                                                                |
| Chemical formula, weight             | $\text{Cu}_2\text{O}_8\text{C}_{40}\text{H}_{20}\text{N}_2$ , 783.7 g mol <sup>-1</sup>               |
| Empirical formula, weight            | $\text{Cu}_{48}\text{O}_{192}\text{C}_{960}\text{H}_{480}\text{N}_{48}$ , 18808.8 g mol <sup>-1</sup> |
| Temperature                          | 111 K                                                                                                 |
| Wavelength                           | Neutrons; 2.8172(2) Å                                                                                 |
| Measurement system                   | E9-FIREPOD at the BER II neutron source, Helmholtz Zentrum Berlin                                     |
| Crystal system                       | Cubic                                                                                                 |
| Space group                          | $Fm\bar{3}m$ (No. 225)                                                                                |
| Unit cell dimensions                 | 46.391(7) Å                                                                                           |
| Volume                               | 99836(26) Å <sup>3</sup>                                                                              |
| Z                                    | 24                                                                                                    |
| Density                              | 0.312821 g cm <sup>-3</sup>                                                                           |
| 2 $\theta$ range for data collection | -9.40873 ° – 141.79128 °                                                                              |
| 2 $\theta$ resolution                | 0.075 °                                                                                               |
| No. of data points                   | 2017                                                                                                  |
| Refinement method, program           | Rietveld L.S. refinement, Full Prof                                                                   |

Supplementary Table 21. Lattice and profile parameters for Rietveld refinements of CD<sub>4</sub> loaded DUT-49.

| Suppl. Figure           | $a$ (Å)   | $R_p$ | $R_{wp}$ | $R_{exp}$ | $\chi^2$ | R-Bragg | CD <sub>4</sub> per UC exp. | CD <sub>4</sub> per UC refin. |
|-------------------------|-----------|-------|----------|-----------|----------|---------|-----------------------------|-------------------------------|
| Supplementary Figure 42 | 46.425(4) | 2.91  | 3.71     | 3.71      | 1.00     | 5.38    | 66                          | 68                            |
| Supplementary Figure 43 | 46.436(4) | 3.02  | 3.95     | 3.60      | 1.20     | 2.84    | 134                         | 145.5                         |
| Supplementary Figure 44 | 46.447(5) | 3.12  | 4.07     | 3.54      | 1.32     | 2.98    | 211                         | 231                           |
| Supplementary Figure 45 | 46.473(5) | 3.22  | 4.30     | 3.48      | 1.53     | 3.23    | 301                         | 311                           |
| Supplementary Figure 46 | 46.469(4) | 3.42  | 4.65     | 3.45      | 1.82     | 3.33    | 391                         | 405                           |
| Supplementary Figure 47 | 46.477(5) | 3.39  | 4.56     | 3.42      | 1.77     | 4.19    | 448                         | 446.5                         |
| Supplementary Figure 48 | 46.472(4) | 2.82  | 3.75     | 3.05      | 1.51     | 2.61    | 480                         | 492                           |

Supplementary Table 22. Fractional coordinates of asymmetric unit in guest free DUT-49.

| Atom-ID | Atom | Coordinates |         |         | $U_{iso}$ | Occupancy |
|---------|------|-------------|---------|---------|-----------|-----------|
|         |      | $x$         | $y$     | $z$     |           |           |
| CuA     | Cu   | 0.00000     | 0.00000 | 0.35040 | 0.01299   | 1.00000   |
| CuB     | Cu   | 0.00000     | 0.00000 | 0.29560 | 0.01299   | 1.00000   |
| OA      | O    | 0.00000     | 0.04041 | 0.34750 | 0.01316   | 1.00000   |
| OB      | O    | 0.00000     | 0.04240 | 0.29930 | 0.01316   | 1.00000   |
| CA      | C    | 0.00000     | 0.05550 | 0.32360 | 0.01408   | 1.00000   |
| CB      | C    | 0.00000     | 0.08810 | 0.32440 | 0.01408   | 1.00000   |
| CC      | C    | 0.00000     | 0.10400 | 0.34990 | 0.01408   | 1.00000   |
| HC      | H    | 0.00000     | 0.09437 | 0.36818 | 0.04711   | 1.00000   |
| CD      | C    | 0.00000     | 0.13410 | 0.34850 | 0.01408   | 1.00000   |
| CE      | C    | 0.00000     | 0.14640 | 0.32100 | 0.01408   | 1.00000   |
| CF      | C    | 0.00000     | 0.13100 | 0.29500 | 0.01408   | 1.00000   |
| HF      | H    | 0.00000     | 0.14059 | 0.27663 | 0.04711   | 1.00000   |
| CG      | C    | 0.00000     | 0.10110 | 0.29720 | 0.01408   | 1.00000   |
| HG      | H    | 0.00000     | 0.08949 | 0.28016 | 0.04711   | 1.00000   |
| NA      | N    | 0.00000     | 0.17690 | 0.32310 | 0.01316   | 1.00000   |
| CH      | C    | 0.00000     | 0.19870 | 0.30130 | 0.01408   | 1.00000   |
| CI      | C    | 0.02410     | 0.21690 | 0.29970 | 0.01408   | 0.50000   |
| HI      | H    | 0.03991     | 0.21474 | 0.31282 | 0.04711   | 0.50000   |
| CJ      | C    | 0.02410     | 0.23820 | 0.27850 | 0.01408   | 0.50000   |
| HJ      | H    | 0.04005     | 0.25122 | 0.27643 | 0.04711   | 0.50000   |
| CK      | C    | 0.00000     | 0.23980 | 0.26020 | 0.01408   | 1.00000   |

Supplementary Table 23. Fractional coordinates of CD<sub>4</sub> molecules in DUT-49 at varied loadings.

| CD <sub>4</sub> per UC | Atom-ID | Atom | <i>x</i> | <i>y</i> | <i>z</i> | <i>U</i> <sub>iso</sub> | Occupancy |
|------------------------|---------|------|----------|----------|----------|-------------------------|-----------|
| 68                     | AD1     | C    | 0.02078  | 0.02078  | 0.41049  | 0.01408                 | 0.307(8)  |
| 68                     | BD1     | C    | 0.08155  | 0.08155  | 0.34879  | 0.01408                 | 0.399(14) |
| 145.5                  | AD1     | C    | 0.02182  | 0.02182  | 0.41981  | 0.01408                 | 0.324(13) |
| 145.5                  | BD1     | C    | 0.08702  | 0.08702  | 0.43858  | 0.01408                 | 0.2803(9) |
| 145.5                  | CD1     | C    | 0.07616  | 0.16468  | 0.39687  | 0.01408                 | 0.386(10) |
| 145.5                  | DD1     | C    | 0.00374  | 0.00374  | 0.22505  | 0.01408                 | 0.1384(5) |
| 231                    | AD1     | C    | 0.02459  | 0.02459  | 0.41011  | 0.01408                 | 0.522(11) |
| 231                    | BD1     | C    | 0.11533  | 0.11533  | 0.44070  | 0.01408                 | 0.686(17) |
| 231                    | CD1     | C    | 0.08399  | 0.18661  | 0.37417  | 0.01408                 | 0.400(12) |
| 231                    | DD1     | C    | 0.04710  | 0.04710  | 0.23536  | 0.01408                 | 0.396(16) |
| 311                    | AD1     | C    | 0.04097  | 0.04097  | 0.41978  | 0.01408                 | 0.652(13) |
| 311                    | BD1     | C    | 0.12171  | 0.12171  | 0.43375  | 0.01408                 | 0.81(2)   |
| 311                    | CD1     | C    | 0.08444  | 0.19053  | 0.36756  | 0.01408                 | 0.397(17) |
| 311                    | DD1     | C    | 0.06153  | 0.06153  | 0.27431  | 0.01408                 | 0.99(3)   |
| 405                    | AD1     | C    | 0.04447  | 0.04447  | 0.40690  | 0.01408                 | 0.898(16) |
| 405                    | BD1     | C    | 0.13369  | 0.13369  | 0.43118  | 0.01408                 | 1.000     |
| 405                    | CD1     | C    | 0.06705  | 0.23219  | 0.36328  | 0.01408                 | 0.661(18) |
| 405                    | DD1     | C    | 0.06492  | 0.06492  | 0.27173  | 0.01408                 | 1.000     |
| 446.5                  | AD1     | C    | 0.02117  | 0.06317  | 0.40297  | 0.01408                 | 0.542(9)  |
| 446.5                  | BD1     | C    | 0.03565  | 0.14019  | 0.25011  | 0.01408                 | 0.687(17) |
| 446.5                  | CD1     | C    | 0.13325  | 0.07868  | 0.33728  | 0.01408                 | 0.596(16) |
| 446.5                  | DD1     | C    | 0.07827  | 0.07827  | 0.27634  | 0.01408                 | 1.000     |
| 492                    | AD1     | C    | 0.01530  | 0.05400  | 0.40869  | 0.01408                 | 0.386(7)  |
| 492                    | BD1     | C    | 0.08305  | 0.08305  | 0.35000  | 0.01408                 | 1.000     |
| 492                    | CD1     | C    | 0.07386  | 0.07386  | 0.27129  | 0.01408                 | 1.000     |
| 492                    | DD1     | C    | 0.02622  | 0.19969  | 0.13841  | 0.01408                 | 0.415(15) |
| 492                    | ED1     | C    | 0.06947  | 0.16414  | 0.28080  | 0.01408                 | 0.572(17) |
| 492                    | FD1     | C    | 0.12357  | 0.12357  | 0.29867  | 0.01408                 | 0.38(3)   |

For each refinement of DUT-50, the Rietveld plots are summarized in Supplementary Figure 49-  
Supplementary Figure 57, and R-values, refined amount of loading, fractional coordinates of framework  
and CD<sub>4</sub> molecules, and lattice parameters are summarized in the following.

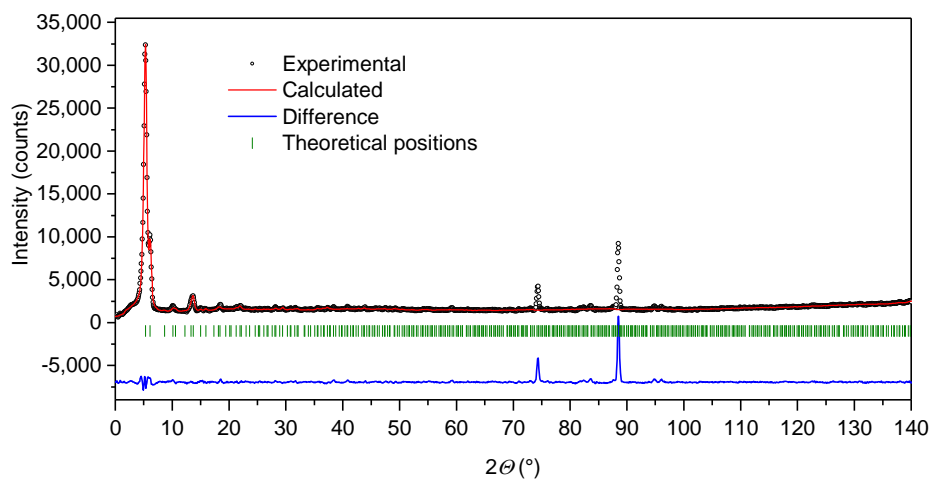

Supplementary Figure 49. Rietveld plot of DUT-50 with a loading of 159 CD<sub>4</sub> molecules per unit cell at 111 K.

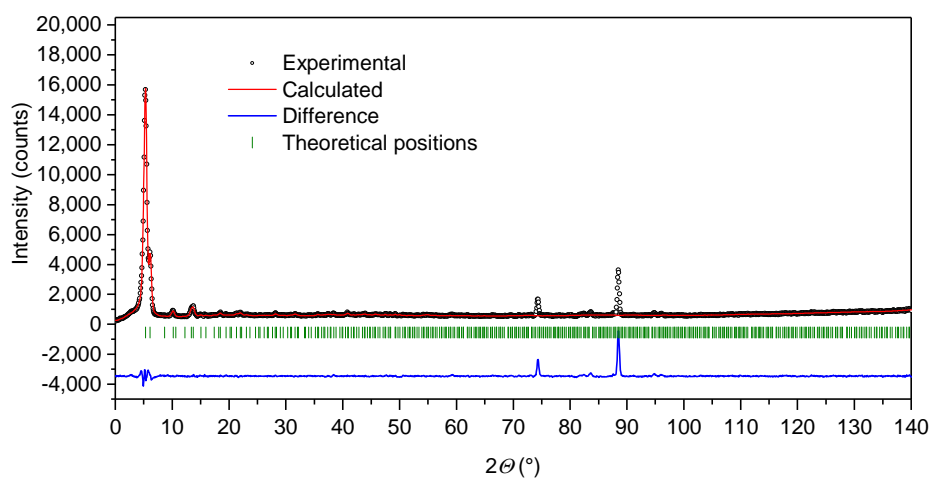

Supplementary Figure 50. Rietveld plot of DUT-50 with a loading of 228.5 CD<sub>4</sub> molecules per unit cell at 111 K.

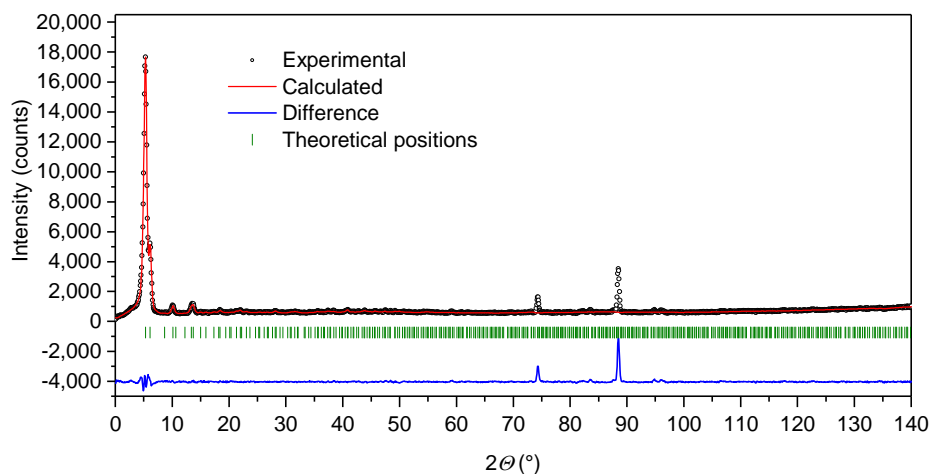

Supplementary Figure 51. Rietveld plot of DUT-50 with a loading of 280 CD<sub>4</sub> molecules per unit cell at 111 K.

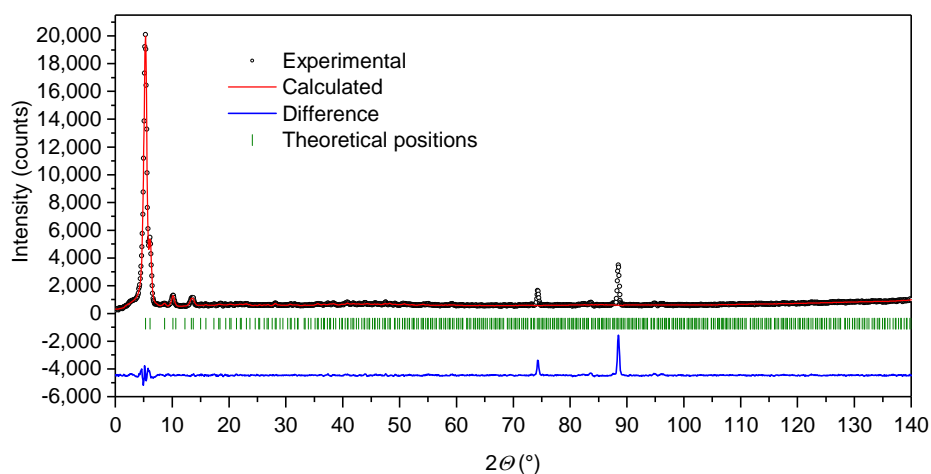

Supplementary Figure 52. Rietveld plot of DUT-50 with a loading of 370 CD<sub>4</sub> molecules per unit cell at 111 K.

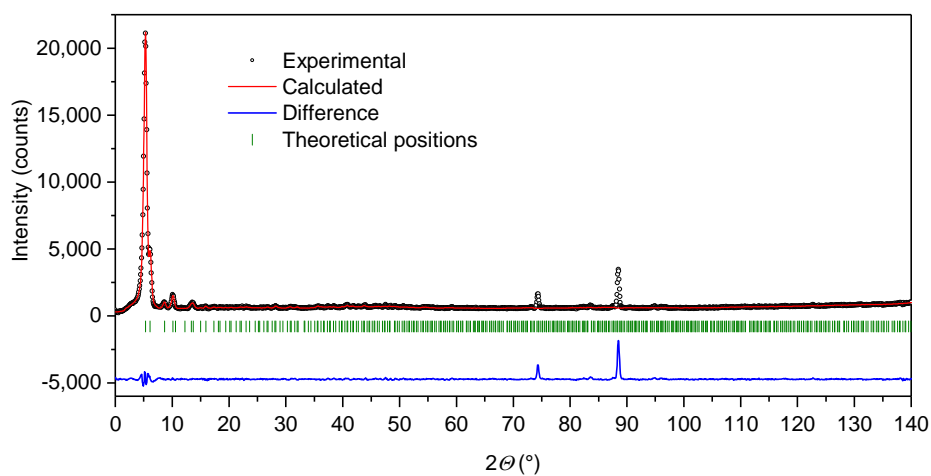

Supplementary Figure 53. Rietveld plot of DUT-50 with a loading of 488 CD<sub>4</sub> molecules per unit cell at 111 K.



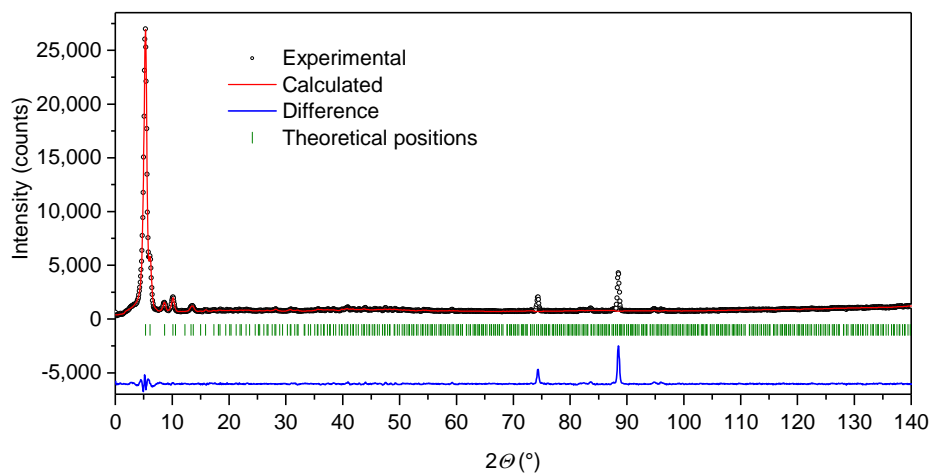

Supplementary Figure 54. Rietveld plot of DUT-50 with a loading of 529 CD<sub>4</sub> molecules per unit cell at 111 K.

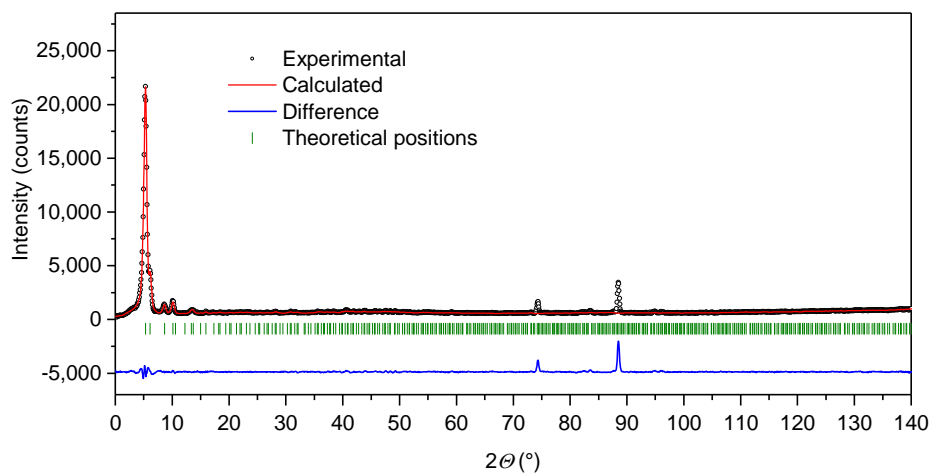

Supplementary Figure 55. Rietveld plot of DUT-50 with a loading of 569 CD<sub>4</sub> molecules per unit cell at 111 K.

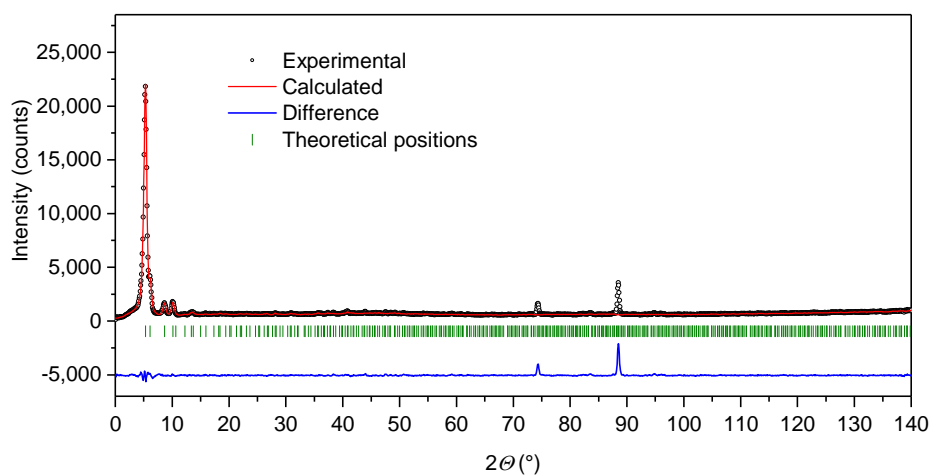

Supplementary Figure 56. Rietveld plot of DUT-50 with a loading of 683 CD<sub>4</sub> molecules per unit cell at 111 K.

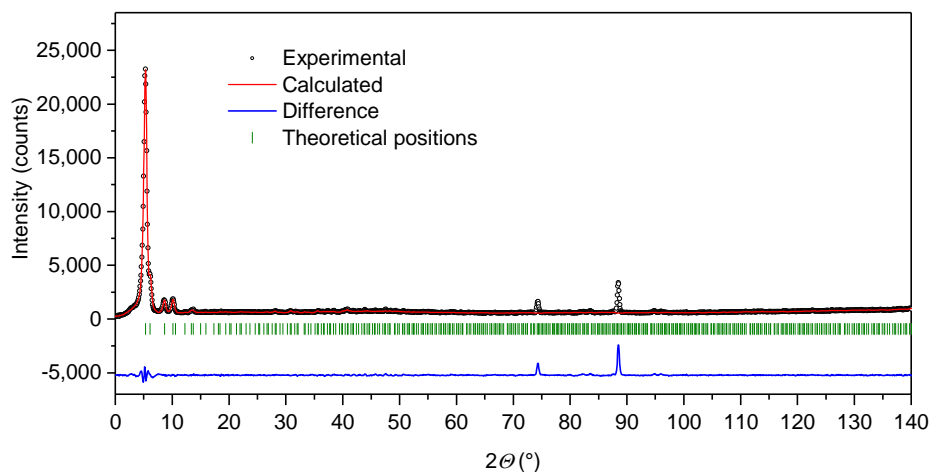

Supplementary Figure 57. Rietveld plot of DUT-50 with a loading of 756 CD<sub>4</sub> molecules per unit cell at 111 K.

Supplementary Table 24. Crystallographic information for DUT-50.

| Material ID                  | DUT-50                                                                                                            |
|------------------------------|-------------------------------------------------------------------------------------------------------------------|
| Chemical formula, weight     | Cu <sub>2</sub> O <sub>8</sub> C <sub>46</sub> H <sub>24</sub> N <sub>2</sub> , 859.7 g mol <sup>-1</sup>         |
| Empirical formula, weight    | Cu <sub>48</sub> O <sub>192</sub> C <sub>960</sub> H <sub>480</sub> N <sub>48</sub> , 20632.8 g mol <sup>-1</sup> |
| Temperature                  | 111 K                                                                                                             |
| Wavelength                   | Neutrons; 2.8172(2) Å                                                                                             |
| Measurement system           | E9-FIREPOD at the BER II neutron source, Helmholtz Zentrum Berlin                                                 |
| Crystal system               | Cubic                                                                                                             |
| Space group                  | <i>Fm</i> $\bar{3}$ <i>m</i> (No. 225)                                                                            |
| Unit cell dimensions         | 52.744(6) Å                                                                                                       |
| Volume                       | 146,731(30) Å <sup>3</sup>                                                                                        |
| Z                            | 24                                                                                                                |
| Density                      | 0.234 g cm <sup>-3</sup>                                                                                          |
| 2θ range for data collection | -9.40873 ° – 141.79128 °                                                                                          |
| 2θ resolution                | 0.075 °                                                                                                           |
| No. of data points           | 2017                                                                                                              |
| Refinement method, program   | Rietveld L.S. refinement, Full Prof                                                                               |

Supplementary Table 25. Lattice and profile parameters for Rietveld refinements of CD<sub>4</sub> loaded DUT-50.

| Suppl. Figure           | $a$ (Å)   | $R_p$ | $R_{wp}$ | $R_{exp}$ | $\chi^2$ | $R$ -Bragg | CD <sub>4</sub> per UC exp. | CD <sub>4</sub> per UC refined |
|-------------------------|-----------|-------|----------|-----------|----------|------------|-----------------------------|--------------------------------|
| Supplementary Figure 49 | 52.852(9) | 3.16  | 4.35     | 2.29      | 3.61     | 4.83       | 161                         | 159                            |
| Supplementary Figure 50 | 52.852(9) | 3.58  | 4.79     | 3.58      | 1.79     | 3.66       | 230                         | 228.5                          |
| Supplementary Figure 51 | 52.785(8) | 3.57  | 4.84     | 3.53      | 1.88     | 3.09       | 280                         | 280                            |
| Supplementary Figure 52 | 52.803(8) | 3.71  | 4.90     | 3.50      | 1.96     | 3.19       | 369                         | 370                            |
| Supplementary Figure 53 | 52.839(8) | 3.51  | 4.62     | 3.46      | 1.78     | 2.80       | 485                         | 488                            |
| Supplementary Figure 54 | 52.855(8) | 3.42  | 4.61     | 3.08      | 2.24     | 2.41       | 530                         | 529                            |
| Supplementary Figure 55 | 52.808(7) | 3.68  | 4.87     | 3.44      | 2.01     | 3.37       | 563                         | 569                            |
| Supplementary Figure 56 | 52.789(5) | 3.46  | 4.75     | 3.43      | 1.92     | 2.60       | 625                         | 683                            |
| Supplementary Figure 57 | 52.814(5) | 3.62  | 4.81     | 3.42      | 1.97     | 2.64       | 751                         | 756                            |

Supplementary Table 26. Fractional coordinates of asymmetric unit in guest-free DUT-50 from NPD data.

| Atom-ID | Atom | Coordinates |         |         | $U_{iso}$ | Occupancy |
|---------|------|-------------|---------|---------|-----------|-----------|
|         |      | $x$         | $y$     | $z$     |           |           |
| CuA     | Cu   | 0.00000     | 0.00000 | 0.36786 | 0.01299   | 1.00000   |
| CuB     | Cu   | 0.00000     | 0.00000 | 0.31786 | 0.01299   | 1.00000   |
| OA      | O    | 0.00000     | 0.03667 | 0.36410 | 0.01316   | 1.00000   |
| OB      | O    | 0.00000     | 0.03640 | 0.32170 | 0.01316   | 1.00000   |
| NA      | N    | 0.00000     | 0.15413 | 0.34587 | 0.01316   | 1.00000   |
| CA      | C    | 0.00000     | 0.04761 | 0.34295 | 0.01408   | 1.00000   |
| CB      | C    | 0.00000     | 0.07581 | 0.34276 | 0.01408   | 1.00000   |
| CC      | C    | 0.00000     | 0.08978 | 0.36513 | 0.01408   | 1.00000   |
| HC      | H    | 0.00000     | 0.08142 | 0.38070 | 0.04711   | 1.00000   |
| CD      | C    | 0.00000     | 0.11591 | 0.36464 | 0.01408   | 1.00000   |
| CE      | C    | 0.00000     | 0.12848 | 0.34150 | 0.01408   | 1.00000   |
| CF      | C    | 0.00000     | 0.11548 | 0.31819 | 0.01408   | 1.00000   |
| HF      | H    | 0.00000     | 0.12408 | 0.30280 | 0.04711   | 1.00000   |
| CG      | C    | 0.00000     | 0.08972 | 0.31925 | 0.01408   | 1.00000   |
| HG      | H    | 0.00000     | 0.08069 | 0.30410 | 0.04711   | 1.00000   |
| CH      | C    | 0.00000     | 0.17419 | 0.32582 | 0.01408   | 1.00000   |
| CI      | C    | 0.01959     | 0.19147 | 0.32550 | 0.01408   | 0.50000   |
| HI      | H    | 0.03271     | 0.19067 | 0.33730 | 0.04711   | 0.50000   |
| CJ      | C    | 0.01923     | 0.21045 | 0.30646 | 0.01408   | 0.50000   |
| HJ      | H    | 0.03198     | 0.22260 | 0.30580 | 0.04711   | 0.50000   |
| CK      | C    | 0.00000     | 0.21100 | 0.28901 | 0.01408   | 1.00000   |
| CL      | C    | 0.00000     | 0.23071 | 0.26927 | 0.01408   | 1.00000   |
| CM      | C    | 0.01898     | 0.24811 | 0.26740 | 0.01408   | 0.50000   |
| HM      | H    | 0.03229     | 0.24750 | 0.27900 | 0.04711   | 0.50000   |

Supplementary Table 27. Fractional coordinates of CD<sub>4</sub> molecules in DUT-50 at varied loadings.

| CD <sub>4</sub> per UC | Atom-ID | Atom | <i>x</i> | <i>Y</i> | <i>z</i> | <i>U</i> <sub>iso</sub> | Occupancy  |
|------------------------|---------|------|----------|----------|----------|-------------------------|------------|
| 159                    | AD1     | C    | 0.11968  | 0.11967  | 0.56437  | 0.01408                 | 0.96(3)    |
| 159                    | BD1     | C    | 0.07280  | 0.07280  | 0.47208  | 0.01408                 | 0.69(3)    |
| 218.5                  | AD1     | C    | 0.14298  | 0.14297  | 0.56304  | 0.01408                 | 0.57(5)    |
| 218.5                  | BD1     | C    | 0.06427  | 0.06427  | 0.47982  | 0.01408                 | 0.45(2)    |
| 218.5                  | CD1     | C    | 0.04005  | 0.04005  | 0.27431  | 0.01408                 | 0.55(4)    |
| 218.5                  | DD1     | C    | 0.07279  | 0.07279  | 0.36556  | 0.01408                 | 0.81(6)    |
| 280                    | AD1     | C    | 0.14736  | 0.14735  | 0.56155  | 0.01408                 | 0.76(3)    |
| 280                    | BD1     | C    | 0.06517  | 0.06517  | 0.50000  | 0.01408                 | 1.000(16)  |
| 280                    | CD1     | C    | 0.04064  | 0.04064  | 0.27612  | 0.01408                 | 0.66(4)    |
| 280                    | DD1     | C    | 0.07366  | 0.07366  | 0.36343  | 0.01408                 | 1.000(19)  |
| 370                    | AD1     | C    | 0.03285  | 0.03285  | 0.39258  | 0.01408                 | 0.81(2)    |
| 370                    | BD1     | C    | 0.11573  | 0.11573  | 0.43472  | 0.01408                 | 1.000(12)  |
| 370                    | CD1     | C    | 0.12766  | 0.06434  | 0.29850  | 0.01408                 | 0.56(3)    |
| 370                    | DD1     | C    | 0.23252  | 0.03077  | 0.42897  | 0.01408                 | 0.46(2)    |
| 488                    | AD1     | C    | 0.02736  | 0.06837  | 0.40339  | 0.01408                 | 0.592(17)  |
| 488                    | BD1     | C    | 0.12289  | 0.06805  | 0.34789  | 0.01408                 | 0.66(3)    |
| 488                    | CD1     | C    | 0.13594  | 0.05012  | 0.27364  | 0.01408                 | 0.54(7)    |
| 488                    | DD1     | C    | 0.22437  | 0.04370  | 0.41114  | 0.01408                 | 0.75(7)    |
| 529                    | AD1     | C    | 0.02705  | 0.06656  | 0.39994  | 0.01408                 | 0.61(2)    |
| 529                    | BD1     | C    | 0.11927  | 0.07254  | 0.34550  | 0.01408                 | 0.65(4)    |
| 529                    | CD1     | C    | 0.14860  | 0.04684  | 0.26776  | 0.01408                 | 0.67(5)    |
| 529                    | DD1     | C    | 0.22223  | 0.04669  | 0.41533  | 0.01408                 | 0.83(5)    |
| 569                    | AD1     | C    | 0.02565  | 0.06478  | 0.39720  | 0.01408                 | 0.651(20)  |
| 569                    | BD1     | C    | 0.12241  | 0.07566  | 0.34224  | 0.01408                 | 0.67(4)    |
| 569                    | CD1     | C    | 0.14852  | 0.04426  | 0.26688  | 0.01408                 | 0.79(5)    |
| 569                    | DD1     | C    | 0.22133  | 0.04777  | 0.41810  | 0.01408                 | 0.86(5)    |
| 683                    | AD1     | C    | 0.03463  | 0.03463  | 0.39225  | 0.01408                 | 1.00000    |
| 683                    | BD1     | C    | 0.11483  | 0.11483  | 0.42957  | 0.01408                 | 1.00000    |
| 683                    | CD1     | C    | 0.02847  | 0.18312  | 0.23351  | 0.01408                 | 0.5592(12) |
| 683                    | DD1     | C    | 0.03934  | 0.03934  | 0.26322  | 0.01408                 | 1.0000(12) |
| 683                    | ED1     | C    | 0.12497  | 0.12497  | 0.30003  | 0.01408                 | 1.0000(12) |

---

|     |     |   |         |         |         |         |            |
|-----|-----|---|---------|---------|---------|---------|------------|
| 683 | FD1 | C | 0.29528 | 0.39076 | 0.45415 | 0.01408 | 1.0000(12) |
| 756 | AD1 | C | 0.04137 | 0.04137 | 0.39096 | 0.01408 | 1.0        |
| 756 | BD1 | C | 0.10866 | 0.10866 | 0.43153 | 0.01408 | 1.0        |
| 756 | CD1 | C | 0.04163 | 0.14674 | 0.23557 | 0.01408 | 0.94(3)    |
| 756 | DD1 | C | 0.04855 | 0.04855 | 0.25574 | 0.01408 | 1.00(3)    |
| 756 | ED1 | C | 0.12880 | 0.12880 | 0.29711 | 0.01408 | 1.00(3)    |
| 756 | FD1 | C | 0.31567 | 0.39142 | 0.44913 | 0.01408 | 1.00(3)    |

---

## Supplementary Note 9: *In situ*-DRIFT spectroscopy

Assignment of vibrational modes of each individual peak in the IR spectra of DUT-48, -46, -49, -50, and -151*int* is difficult and elaborate DFT analysis is beyond the scope of this study. However, each MOF and ligand contains the same 9*H*-carbazole-3,6-dicarboxylate building-block and a C-N bond to an aromatic bridging unit. Vibrational modes of these units will show the same peak positions in the IR spectra. In fact, several peaks with minor variation in wave number can be found in the spectra of all compounds analysed. Peaks which are found for all materials and can be assigned to vibrational modes of C-H, C-C, and C-N vibrations in the ligand backbone are of special interest as they are expected to be impacted by ligand buckling upon structural transition. These peaks are summarized in Supplementary Table 28. Air sensitive samples were analysed in a HARRICK Praying Mantis reaction chamber sealed by a removable dome with IR-transparent ZnSe windows. The same setup was used to perform *in situ* DRIFT analysis by applying a constant flow of a mixture of inert carrier gas (N<sub>2</sub>) and adsorptive (*n*-butane or vaporized CCl<sub>4</sub>). For the analysis of *n*-butane adsorption, the gas composition was controlled via two mass flow controllers (MFC). The composition during *in situ* adsorption of vaporized CCl<sub>4</sub> was estimated by two valves controlling the flux of inert and CCl<sub>4</sub> saturated inert gas.

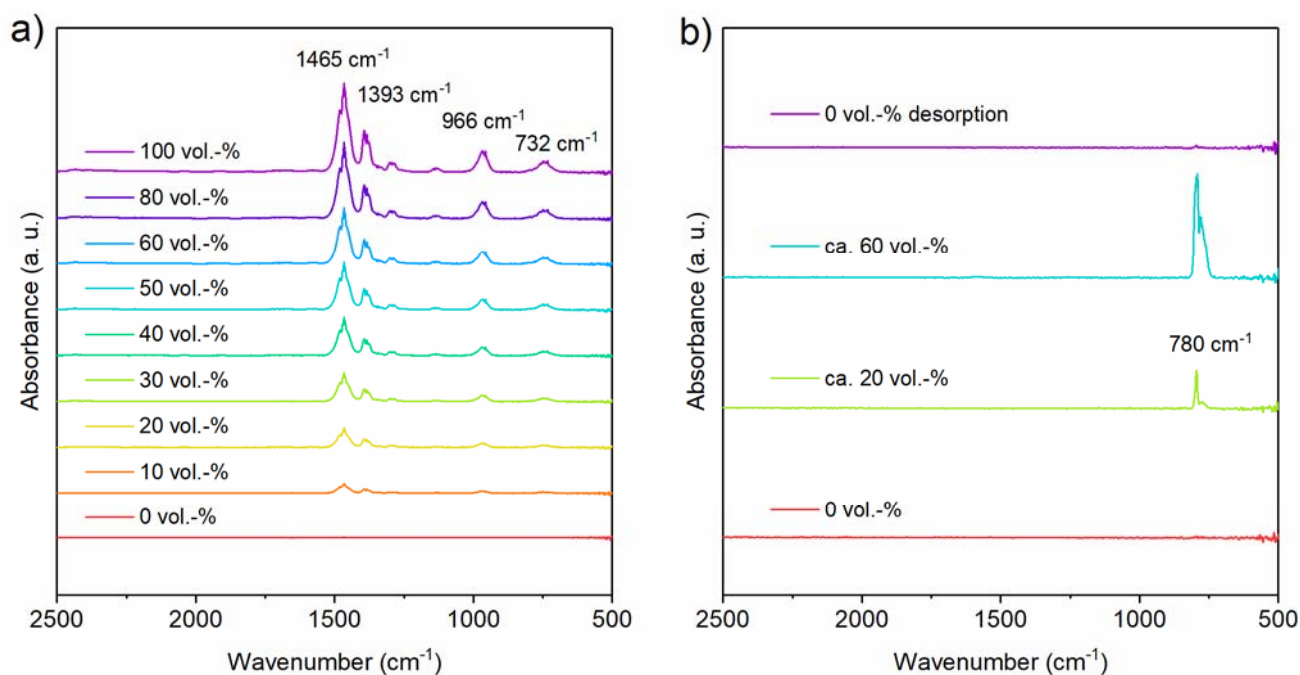

Supplementary Figure 58. a) DRIFT spectra of KBr filled sample holder at different concentrations of *n*-butane at 299 K and b) varying concentrations of CCl<sub>4</sub> vapour in nitrogen.

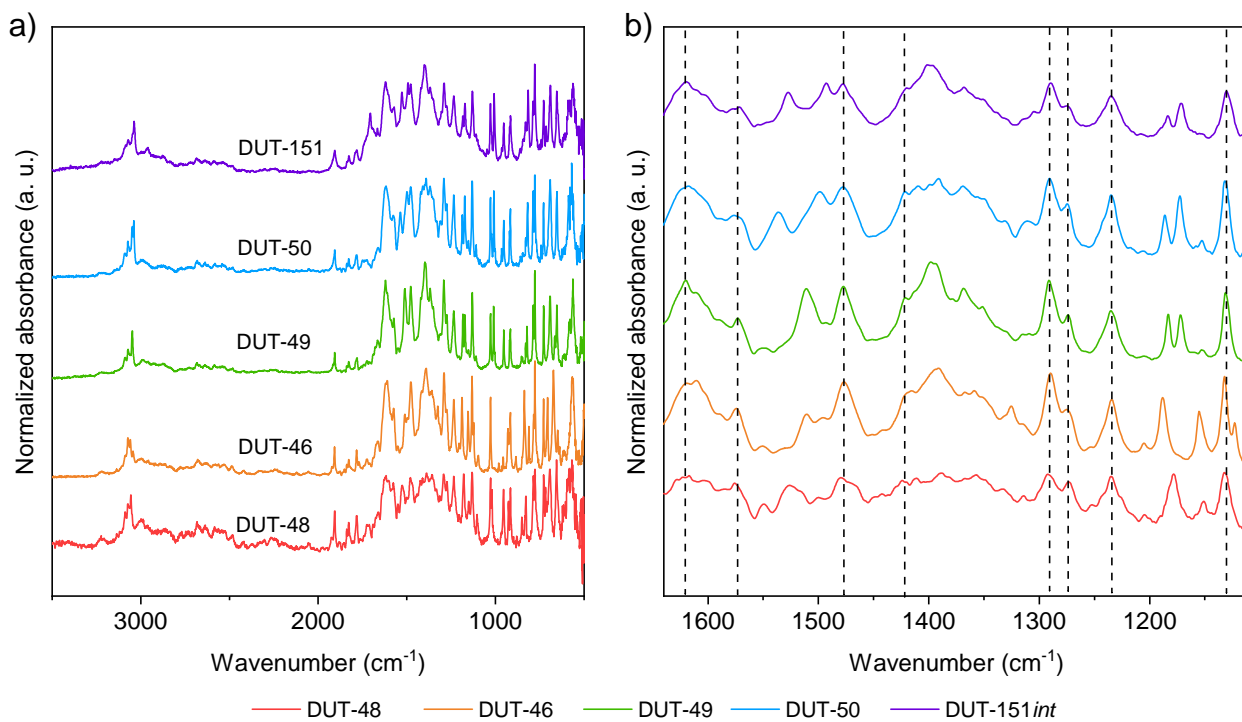

Supplementary Figure 59. a) DRIFT spectra of DUT-48 (red), DUT-46 (orange), DUT-49 (green), DUT-50 (blue), and DUT-151int (purple). b) magnified region of vibrations assigned to the ligand backbone. Vertical dashed lines indicate vibrations found in all materials which are thus assigned to the carbazole cores.



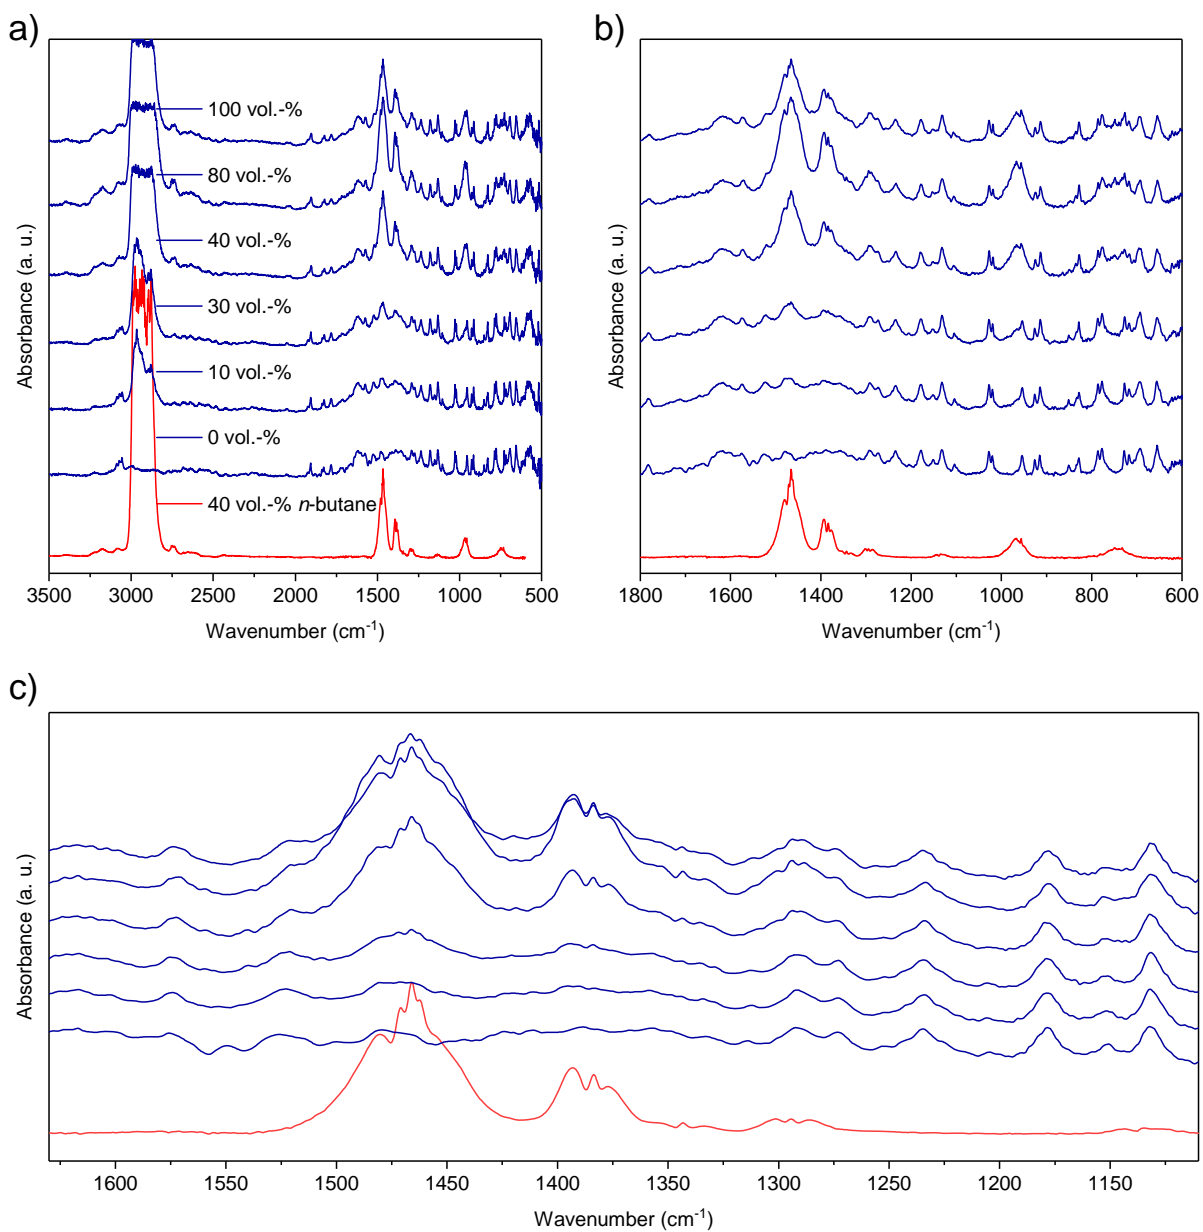

Supplementary Figure 60. a) *In situ*-DRIFT spectra of DUT-48 at varied loadings of *n*-butane at 299 K and b,c) magnifications of fingerprint region.

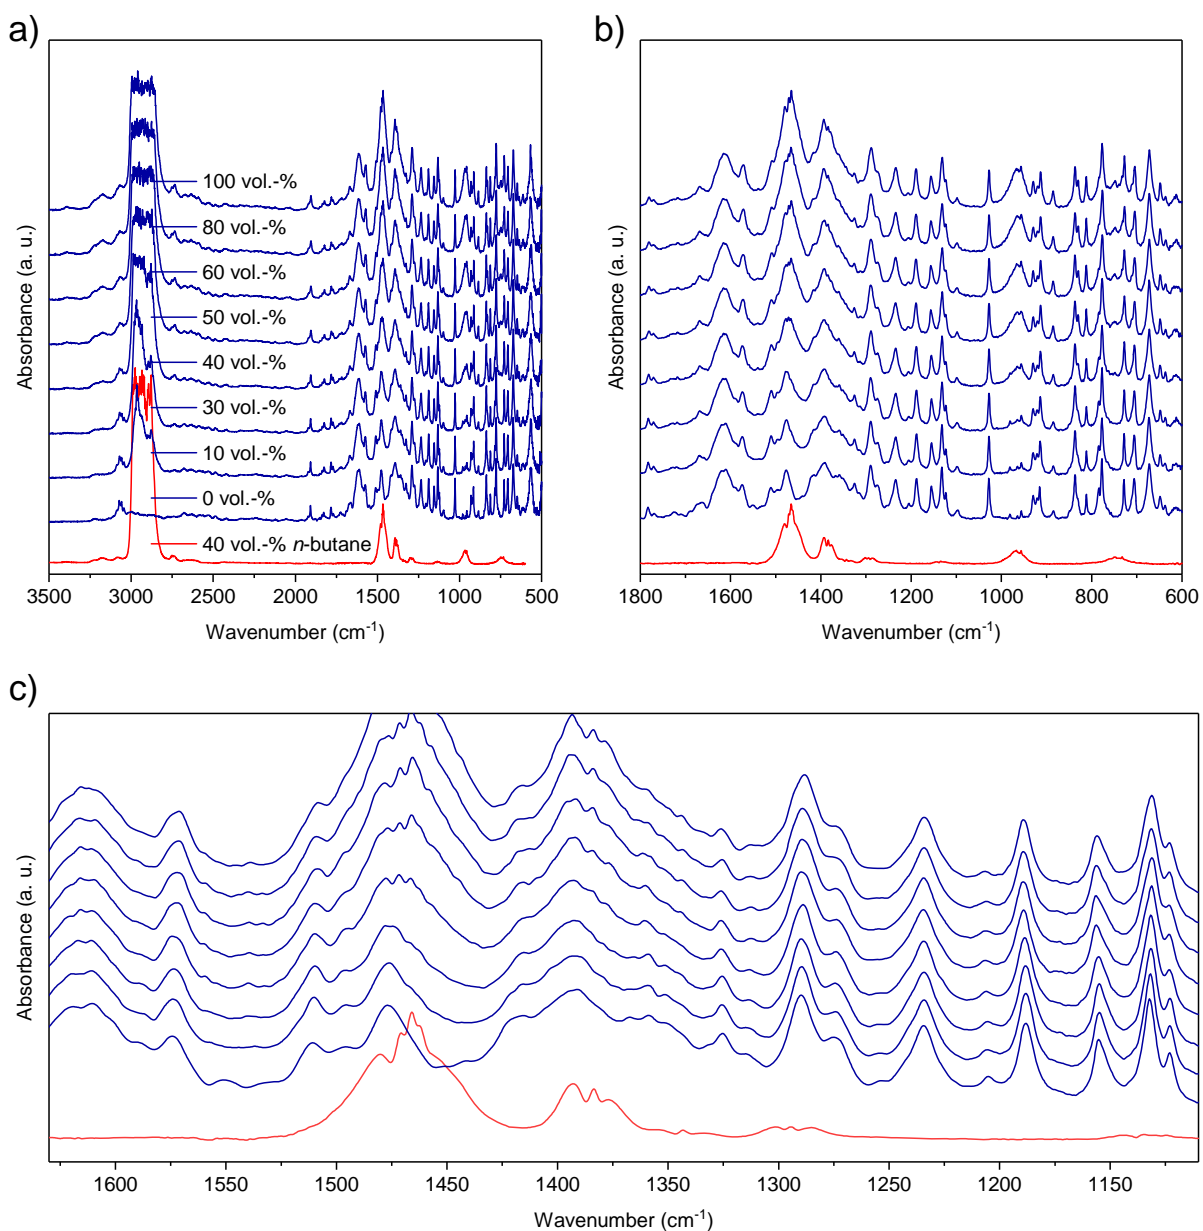

Supplementary Figure 61. a) *In situ*-DRIFT spectra of DUT-46 at varied loadings of *n*-butane at 299 K and b,c) magnifications of fingerprint region.

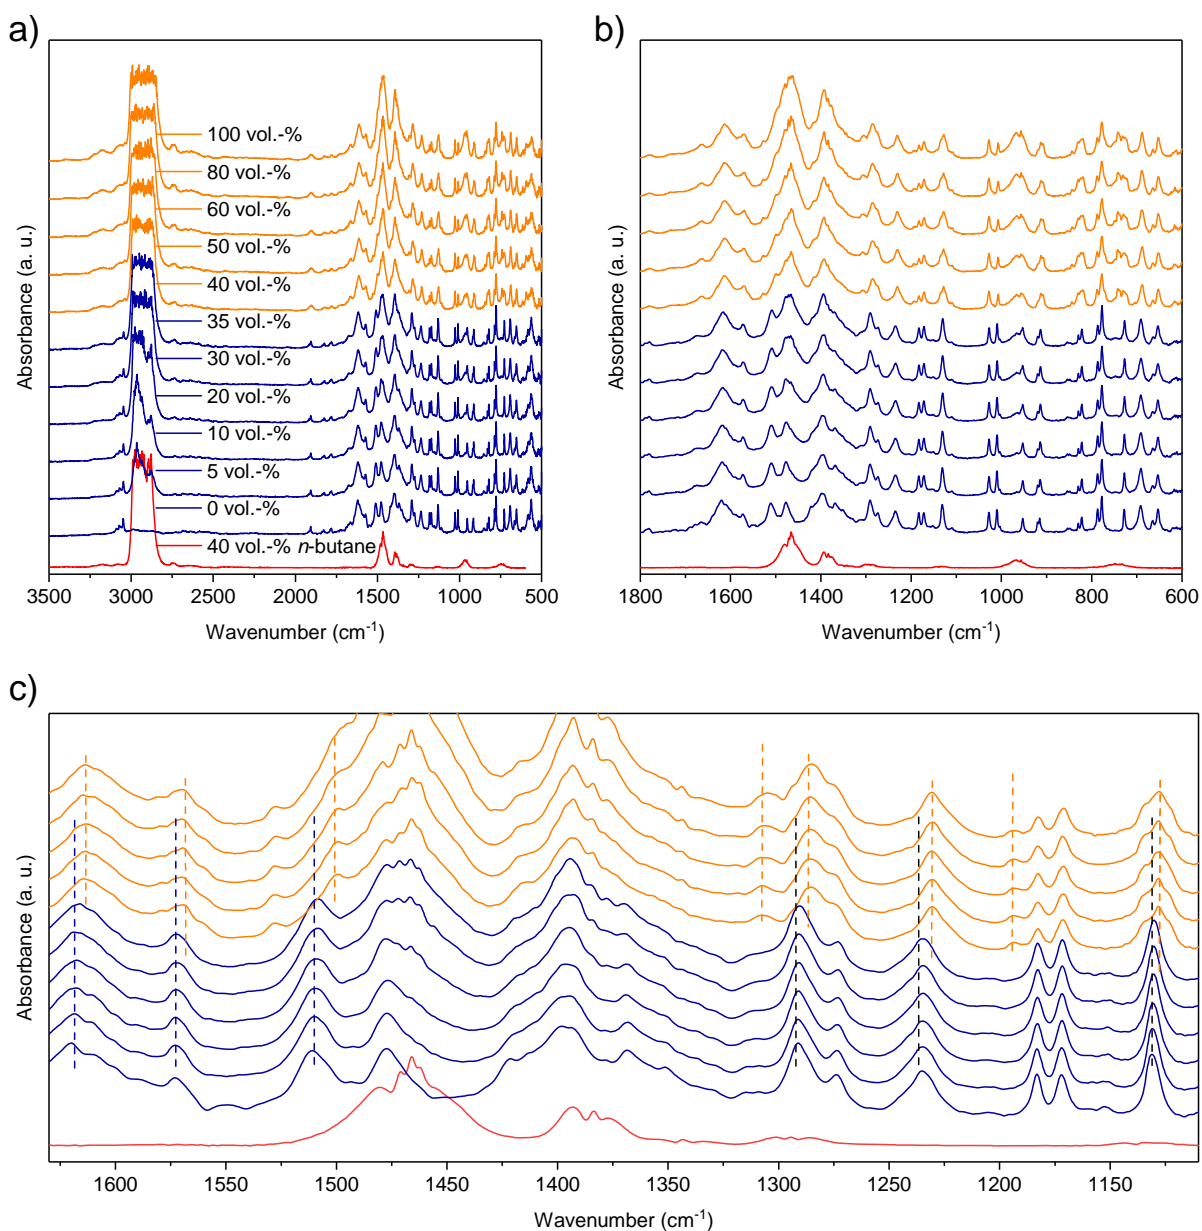

Supplementary Figure 62. a) *In situ*-DRIFT spectra of DUT-49 at varied loadings of *n*-butane at 299 K and b,c) magnifications of fingerprint region. Color code: blue: before transition, orange: after transition, dashed lines indicate shifts of peaks.

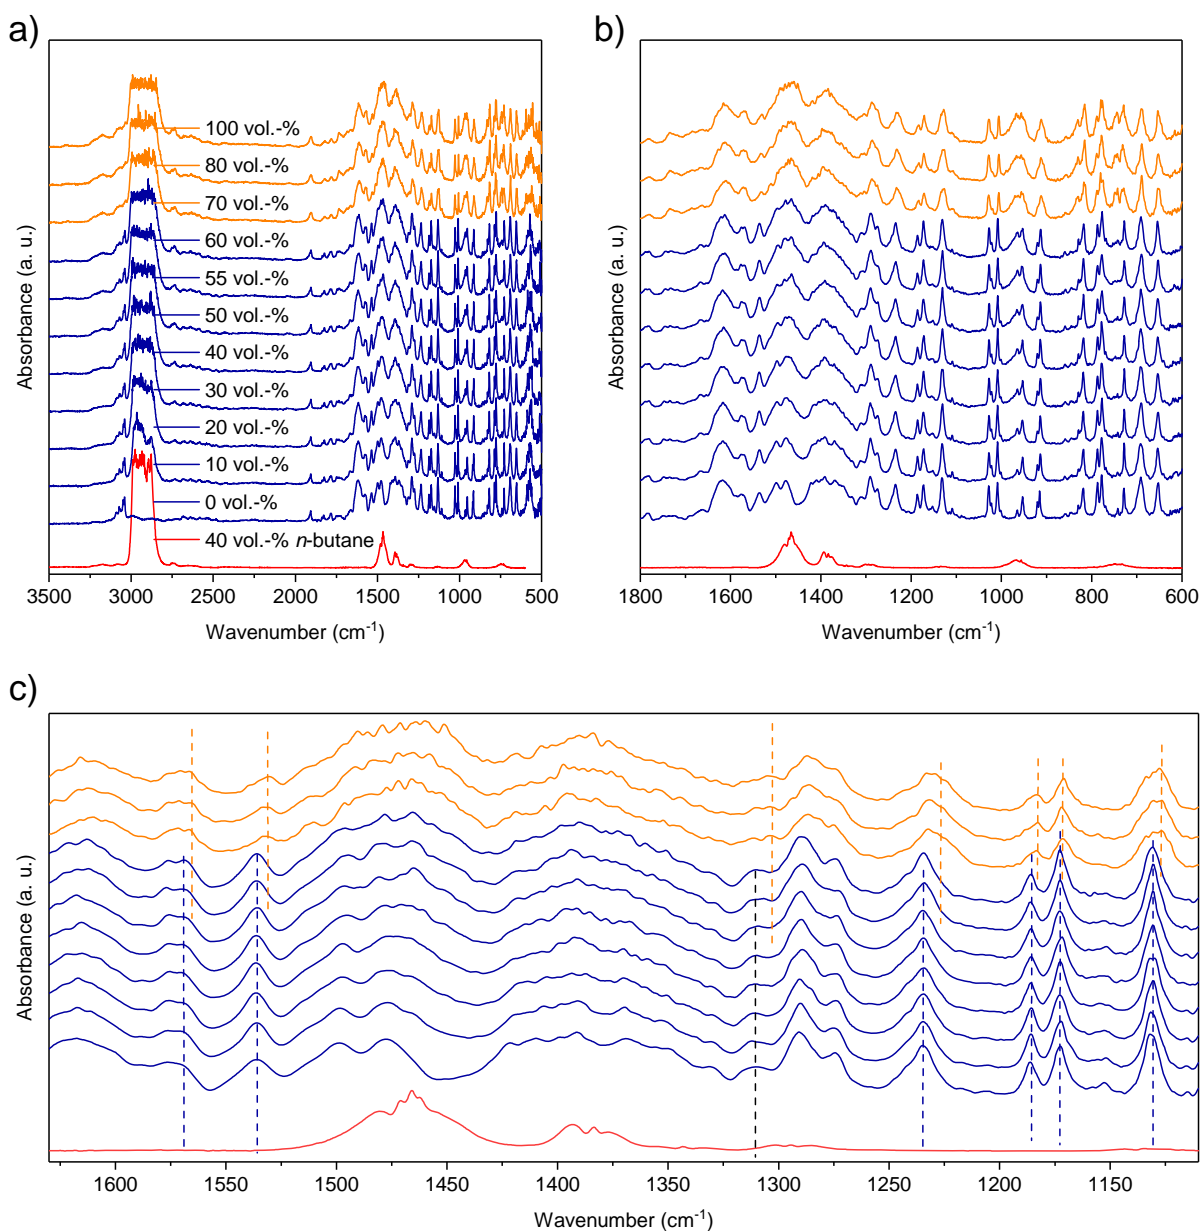

Supplementary Figure 63. a) *In situ*-DRIFT spectra of DUT-50 at varied loadings of *n*-butane at 299 K and b,c) magnifications of fingerprint region. Color code: blue: before transition, orange: after transition, dashed lines indicate shifts of peaks.

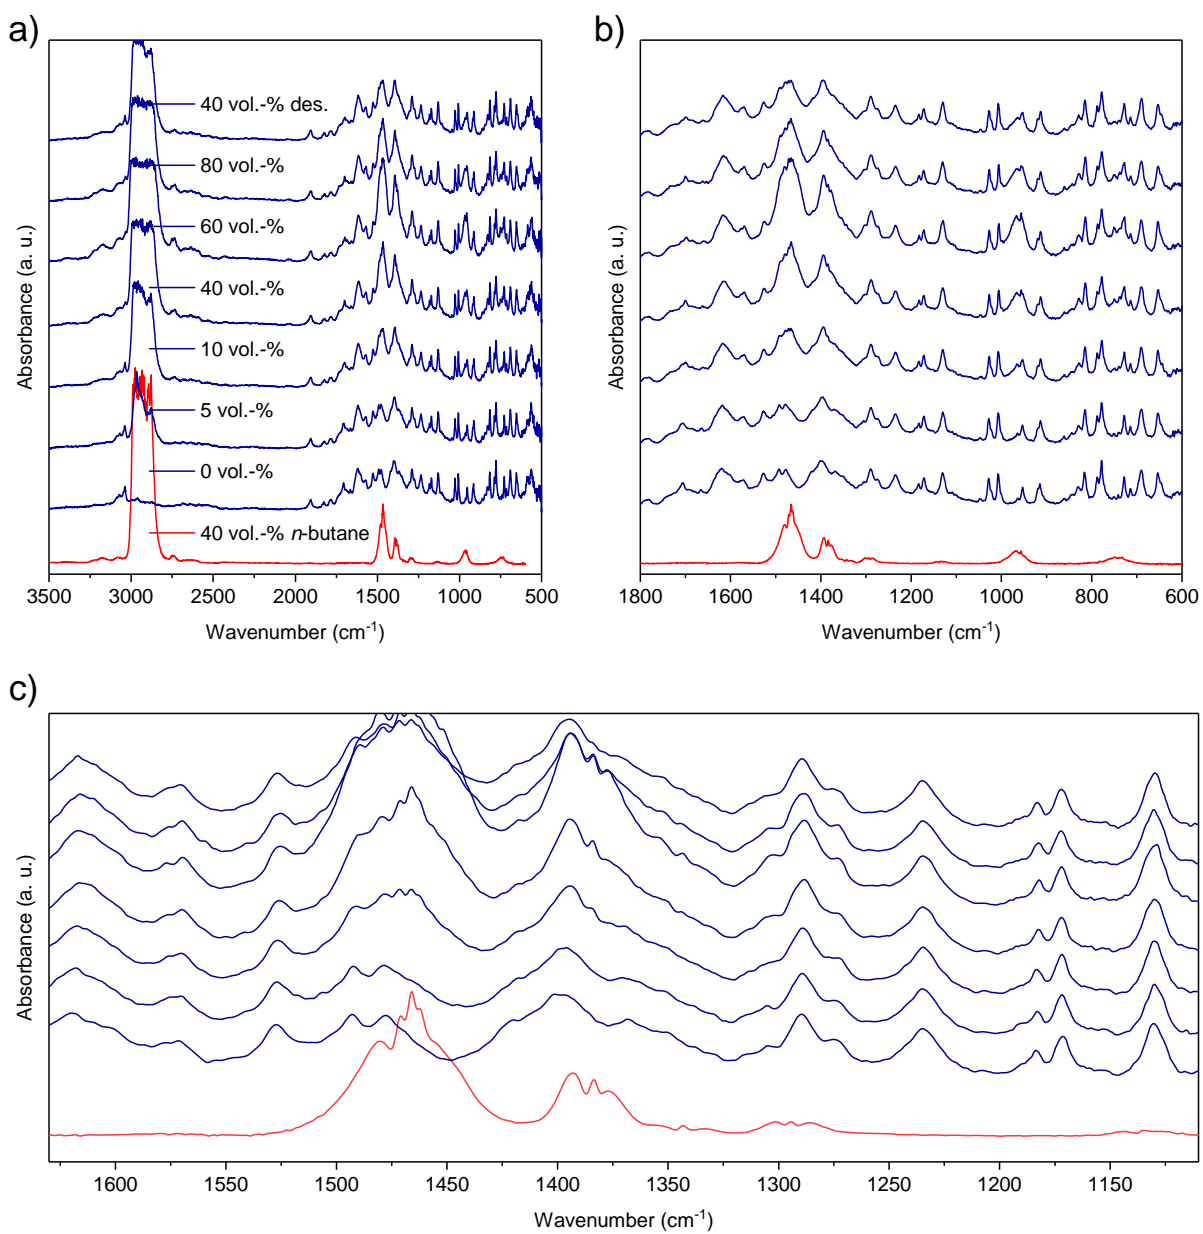

Supplementary Figure 64. a) *In situ*-DRIFT spectra of DUT-151 at varied loadings of *n*-butane at 299 K and b,c) magnifications of fingerprint region.

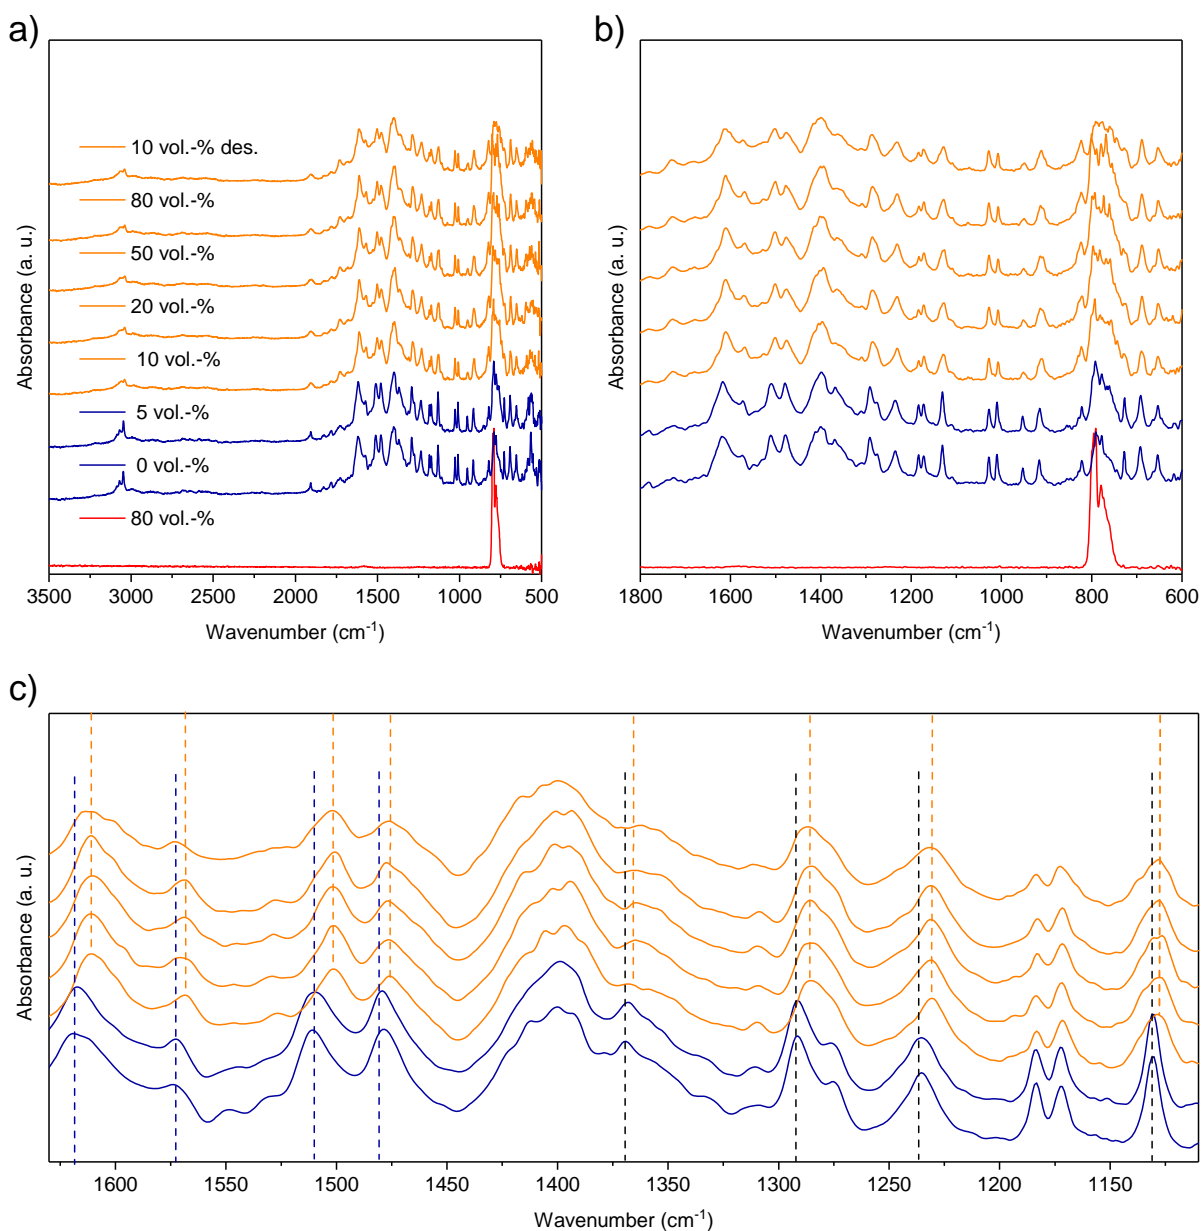

Supplementary Figure 65. a) *In situ*-DRIFT spectra of DUT-49 at varied loadings of  $\text{CCl}_4$  at 299 K and b,c) magnifications of fingerprint region. Color code: blue: before transition, orange: after transition, dashed lines indicate shifts of peaks.

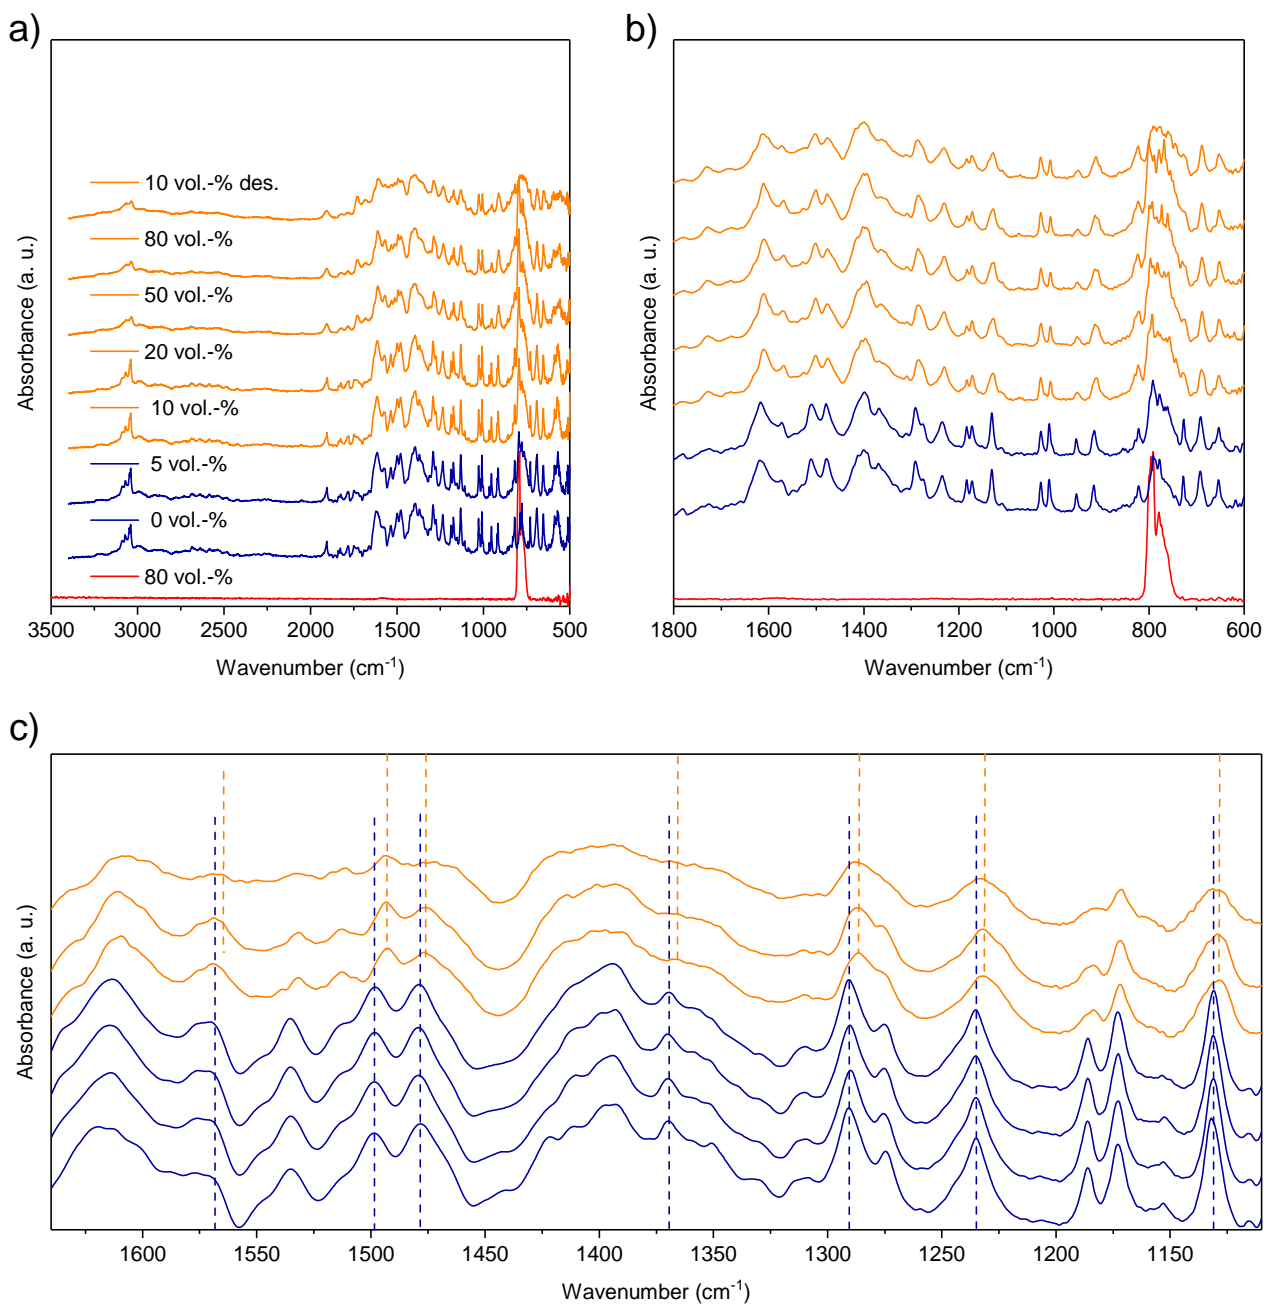

Supplementary Figure 66. a) *In situ*-DRIFT spectra of DUT-50 at varied loadings of CCl<sub>4</sub> at 299 K and b,c) magnifications of fingerprint region. Color code: blue: before transition, orange: after transition, dashed lines indicate shifts of peaks.

For DUT-49 and DUT-50, a shift in peak position to lower wavenumbers is observed upon adsorption of *n*-butane and CCl<sub>4</sub> which can be assigned to the structural contraction previously analysed by *in situ* PXRD. Several peaks are found to be affected in the spectra of DUT-49 in Supplementary Figure 62 (*n*-butane), Supplementary Figure 65 (CCl<sub>4</sub>) and for DUT-50 in Supplementary Figure 63 (*n*-butane), Supplementary Figure 66 (CCl<sub>4</sub>), respectively. The peaks which are shifted upon structural contraction are mostly different from the peaks found to be identical for the whole series of MOFs summarized in Supplementary Table 28. Consequently, they can most likely be assigned to changes of vibrational modes in the bridging units of the linkers and not the carbazole core.

Supplementary Table 28. Experimental peaks observed by *in situ* DRIFT spectroscopy in comparison with assigned peaks from reference <sup>41</sup>.

| Material ID                                          | Wave number (cm <sup>-1</sup> )                                    |                                                           |                                    |                                                         |                                                                          |                                  |                                    |       |
|------------------------------------------------------|--------------------------------------------------------------------|-----------------------------------------------------------|------------------------------------|---------------------------------------------------------|--------------------------------------------------------------------------|----------------------------------|------------------------------------|-------|
| DUT-48                                               | 1610 (br)                                                          | 1575                                                      | 1478                               | 1423                                                    | 1291                                                                     | 1272                             | 1234                               | 1132  |
| DUT-46                                               | 1620                                                               | 1573                                                      | 1476                               | 1418                                                    | 1289                                                                     | 1273                             | 1234                               | 1132  |
| DUT-49                                               | 1619                                                               | 1572                                                      | 1508                               | 1289                                                    | 1234                                                                     | n. a.                            | n. a.                              | 1131  |
| DUT-49 (CCl <sub>4</sub> )                           | 1610                                                               | 1558                                                      | 1501                               | 1284                                                    | 1230                                                                     | n. a.                            | n. a.                              | 1127  |
| DUT-49<br>( <i>n</i> -butane)                        | 1613                                                               | 1569                                                      | 1499                               | 1286                                                    | 1229                                                                     | n. a.                            | n. a.                              | 1128  |
| DUT-50                                               | 1569                                                               | 1479                                                      | 1311                               | 1290                                                    | 1234                                                                     | 1185                             | 1172                               | 1131  |
| DUT-50 (CCl <sub>4</sub> )                           | 1566                                                               | 1475                                                      | 1302                               | 1285                                                    | 1231                                                                     | 1182                             | 1170                               | 1128  |
| DUT-50<br>( <i>n</i> -butane)                        | 1565                                                               | 1477                                                      | 1303                               | 1285                                                    | 1231                                                                     | 1182                             | 1170                               | 1127  |
| DUT-151                                              | 1619                                                               | 1571                                                      | 1477                               | 1420                                                    | 1289                                                                     | 1274                             | 1233                               | 1128  |
| Reference <sup>41</sup>                              | 1620                                                               | 1497                                                      | 1442                               | 1364                                                    | 1343                                                                     | 1299                             | 1217                               | n. a. |
| Reference <sup>41</sup> -<br>assignment <sup>#</sup> | $\nu(\text{C-C})_{\text{b}}$ ,<br>$\delta(\text{C-H})_{\text{ip}}$ | $\delta(\text{C-H})_{\text{ip,b}}$ ,<br>$\nu(\text{C-N})$ | $\delta(\text{C-H})_{\text{ip,c}}$ | $\delta(\text{C-H})_{\text{ip}}$ ,<br>$\nu(\text{C-N})$ | $\delta(\text{C-H})_{\text{ip}}$ ,<br>$\nu(\text{C-N}), \nu(\text{C-C})$ | $\delta(\text{C-H})_{\text{ip}}$ | $\delta(\text{C-H})_{\text{ip,c}}$ | n. a. |

<sup>#</sup>  $\delta$  and  $\nu$  refer to deformation and stretching modes, respectively. 'ip' indicate in plane modes. 'c' and 'b' indicate a dominant localization on the carbazole groups or biphenyl, respectively.



## Supplementary Note 10: Solid-state MAS NMR studies

Solid-state NMR measurements were carried out on a Bruker Ascend 800 spectrometer equipped with a 3.2 mm HX probe. The  $^1\text{H}$ - $^{13}\text{C}$  cross polarization experiments were performed at a resonance frequency of 800.2 MHz for protons and 201.2 MHz for carbon. The contact time was 4 ms and the relaxation delay was 3 s. A sample rotation of 15 kHz was chosen. The  $^{13}\text{C}$  chemical shift was referenced using adamantane.

The rotor was filled with the activated material (*op*-phase) under argon atmosphere. After NMR analysis of argon-filled DUT-49*op*, the rotor was opened under *n*-butane atmosphere and equilibrated for 2 min to obtain the *cp*-phase of the MOF. Formation of the *cp*-phase under these conditions was confirmed in a separate experiment by *in situ* PXRD. After sealing the rotor, the measurements of the butane filled *cp*-phase were carried out. Subsequently, the rotor was re-opened allowing the sample to have extended contact to ambient conditions and moisture which is known to initiate decomposition of the material. For these samples no reflections in the PXRD patterns could be observed.

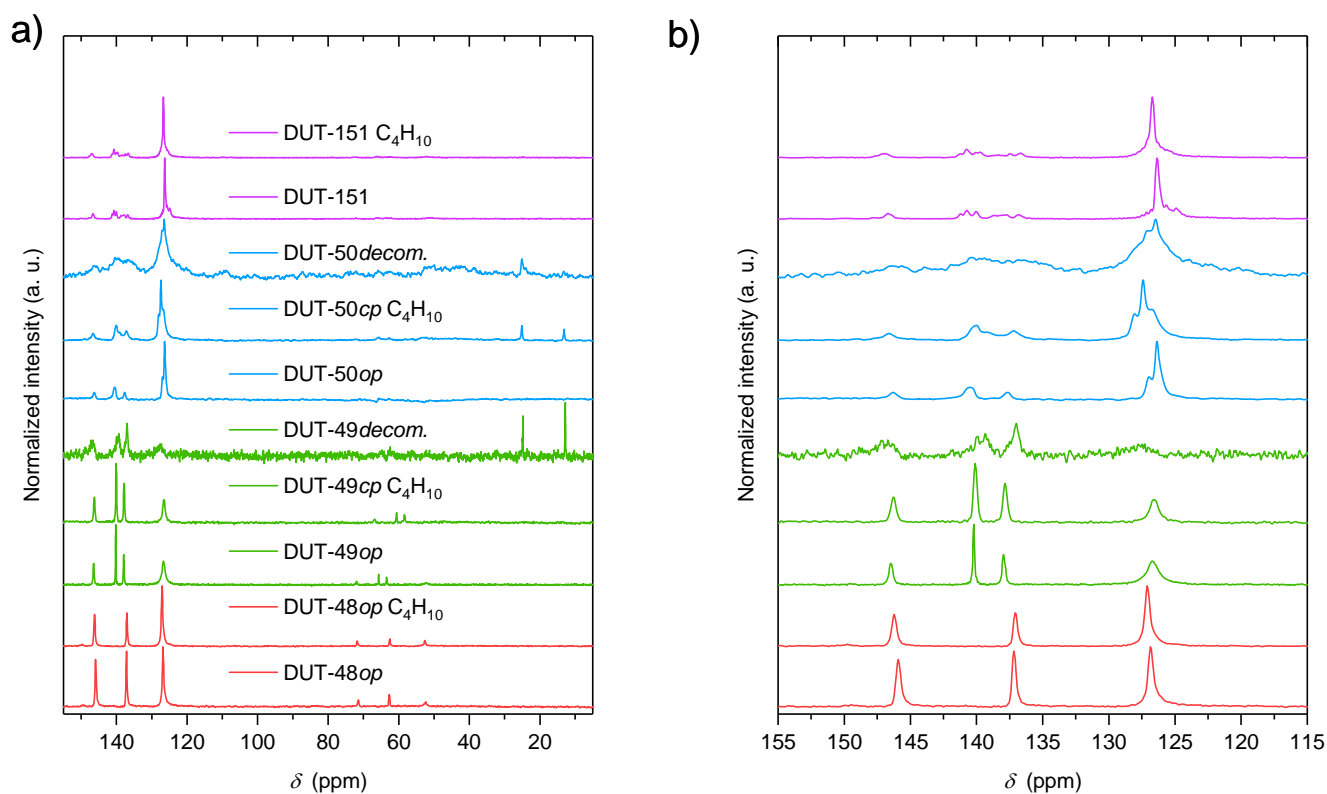

Supplementary Figure 67. Solid-state  $^{13}\text{C}$  CP MAS NMR spectra for DUT-48, DUT-49, DUT-50 and DUT-151 filled with argon and *n*-butane at 298K.

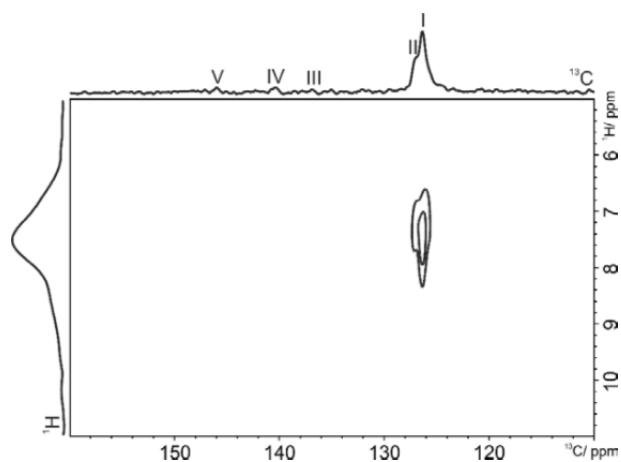

Supplementary Figure 68.  $^{13}\text{C}$ - $^1\text{H}$ -HETCOR- spectrum of Ar-filled DUT-50op at a contact time of 0.7 ms ( $\nu_{\text{rot}} = 15$  kHz).

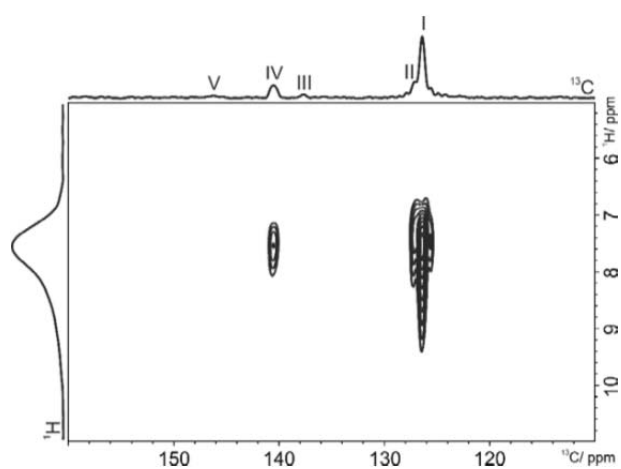

Supplementary Figure 69.  $^{13}\text{C}$ - $^1\text{H}$ -HETCOR spectrum of Ar-filled DUT-50op at a contact time of 4 ms ( $\nu_{\text{rot}} = 15$  kHz).

Supplementary Table 29. Peak assignment of  $^{13}\text{C}$  NMR signals in DUT-50.

| Signal | $\delta$ (ppm) | Assignment |
|--------|----------------|------------|
| I      | 126.3          | CH         |
| II     | 127.0          | C          |
| III    | 137.7          | C          |
| IV     | 140.5          | C          |
| V      | 146.3          | C          |

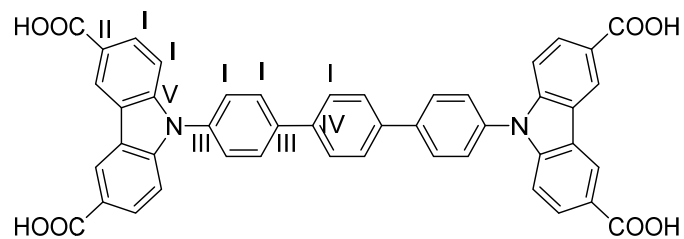

Supplementary Figure 70. Chemical structure of L<sub>4</sub> and assignment of <sup>13</sup>C NMR signals. The assignment of signal I to the CH groups and II-V to quaternary could be further corroborated by solid-state APT (attached proton test) experiments (data not shown). The assignment of signals II-V observed for intact DUT-50 to the designated carbon positions in the linker is suggested based on chemical shift predictions calculated with the computer program ChemDraw.

Supplementary Table 30. Unit cell parameter derived from structural modelling for the disorder free *op* phases in  $Pa\bar{3}$  space group.

|                                                      | DUT-48    | DUT-46    | DUT-49     | DUT-50     | DUT-151 |
|------------------------------------------------------|-----------|-----------|------------|------------|---------|
| Simulated unit cell volume ( $\text{\AA}^3$ )        | 63570.67  | 79761     | 97153      | 141092     | 199196  |
| Simulated lattice parameter, $a$ ( $\text{\AA}$ )    | 39.91     | 43.045    | 45.971     | 52.059     | 58.55   |
| Experimental unit cell volume ( $\text{\AA}^3$ )     | 66381(14) | 82597(28) | 101117(19) | 145781(51) | n. a.   |
| Experimental lattice parameter, $a$ ( $\text{\AA}$ ) | 40.490(5) | 43.550(5) | 46.588(5)  | 52.630(6)  | n. a.   |

Supplementary Table 31. Structure parameter derived from the MD simulations.

|                                                                          | DUT-48 | DUT-46 | DUT-49 | DUT-50 | DUT-151 |
|--------------------------------------------------------------------------|--------|--------|--------|--------|---------|
| Global minimum (Unit cell volume <i>op</i> ) ( $\text{\AA}^3$ )          | 63044  | 78402  | 96071  | 142645 | 197645  |
| Local minimum (Unit cell volume <i>cp</i> ) ( $\text{\AA}^3$ )           | 35287  | 41421  | 45882  | 58185  | 74988   |
| Unit cell volume structural model <i>cp</i> ( $\text{\AA}^3$ )           | 36674  | 41501  | 47360  | 57858  | 76227   |
| Simulated transition pressure (MPa)                                      | 145    | 84     | 65     | 38     | 22      |
| Free energy difference <i>op-cp</i> ( $\text{kJ mol}_{\text{uc}}^{-1}$ ) | 892    | 793    | 768    | 598    | 336     |

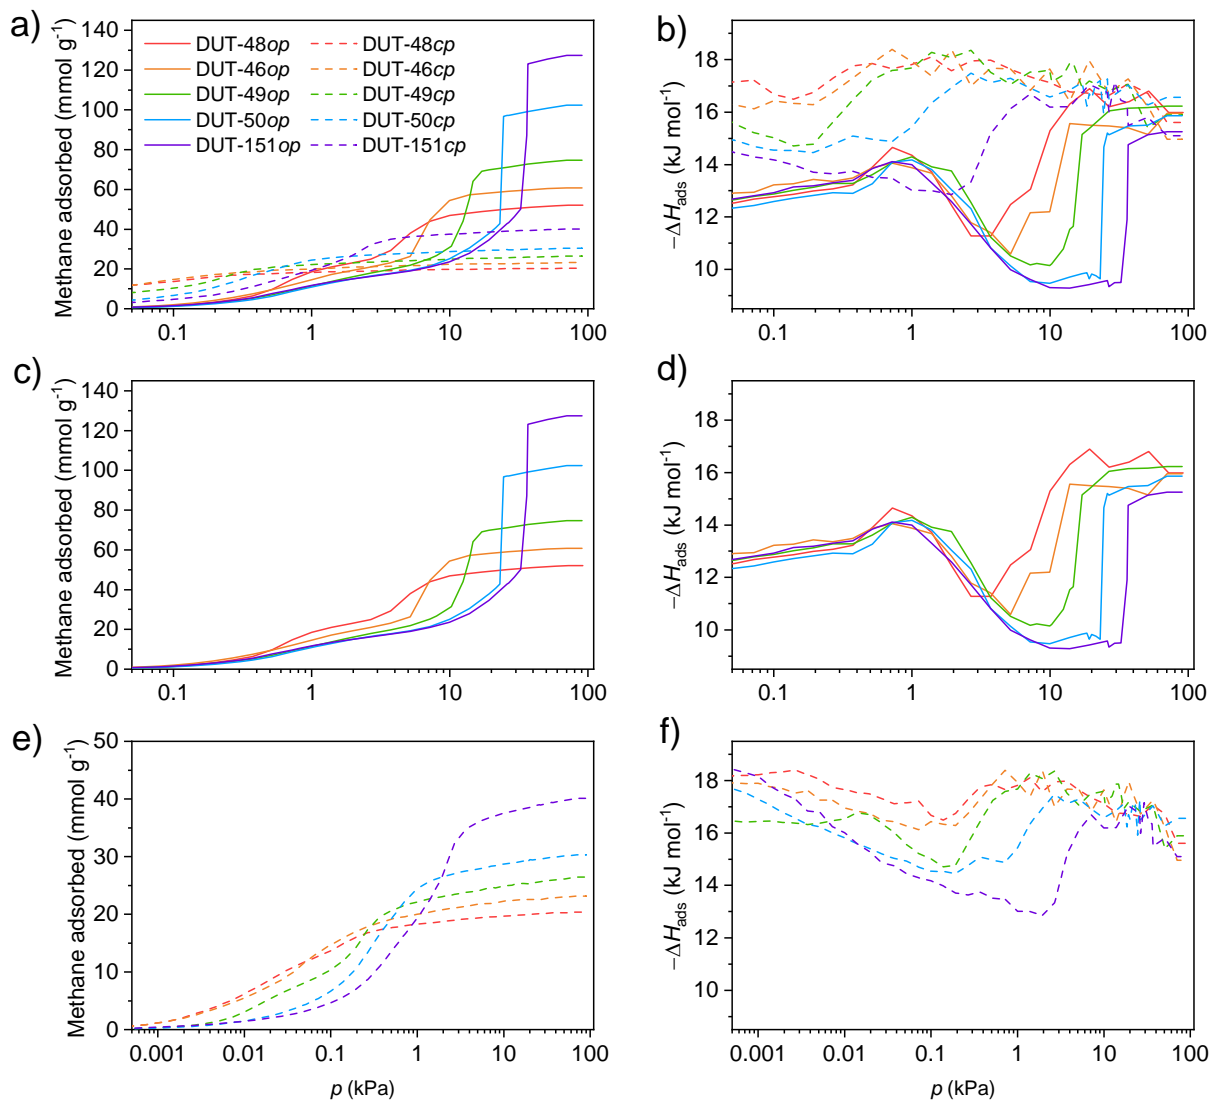

Supplementary Figure 71. a,c,e) Simulated methane adsorption isotherms at 111 K. b,d,f) Corresponding enthalpy profiles. Color code: DUT-48 (red), DUT-46 (orange), DUT-49 (green), DUT-50 (blue), DUT-151 (purple), *op* (full lines) and *cp* (dashed lines).

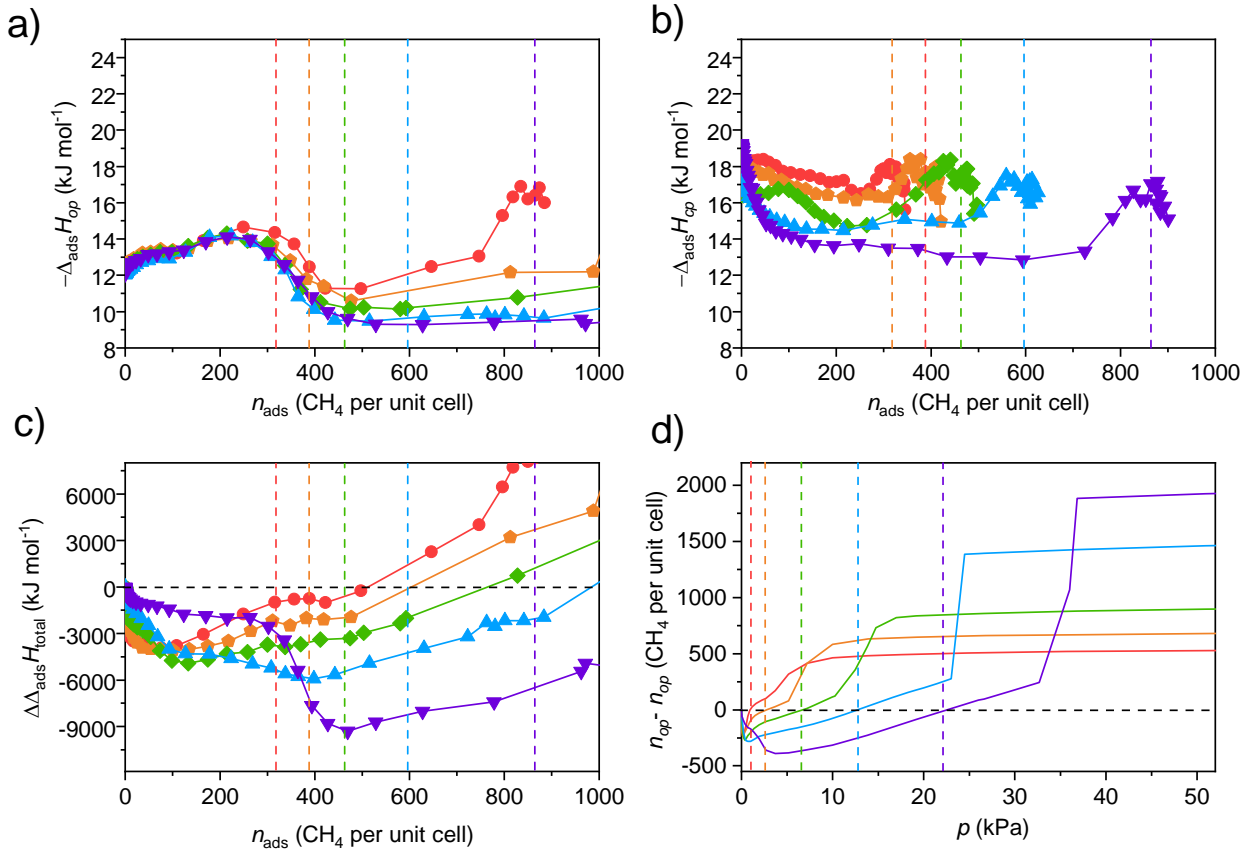

Supplementary Figure 72. a,b) Adsorption enthalpies for methane adsorption at 111 K plotted against the loading in the *op* (a) and *cp* phases (b) of DUT-48 (red), DUT-46 (orange), DUT-49 (green), DUT-50 (blue), DUT-151 (purple); c) evolution of  $\Delta\Delta_{\text{ads}}H_{\text{total}}$  with loading and d) the difference in uptake between the *op* and *cp* phase plotted against pressure. Intersections of the *op*-*cp* isotherms are indicated as vertical dashed lines.

### Supplementary Note 11: Thermodynamic considerations

At the intersection of the isotherms,  $n_{\text{ads}} = n_{\text{ads},op} = n_{\text{ads},cp}$ , indicated as dashed lines in Supplementary Figure 72, the difference in adsorption enthalpy of methane adsorbed in the *op* and *cp* phase increases from  $3.7 \text{ kJ mol}^{-1}$  methane in DUT-48 to  $7.4 \text{ kJ mol}^{-1}$  methane in DUT-50. The total gain in adsorption enthalpy upon structural contraction per unit cell,  $\Delta\Delta_{\text{ads}}H_{\text{total}}$ , at the intersection of the isotherms of *op* and *cp* phase can be estimated by multiplying the difference of adsorption enthalpy in the *op* and *cp* phase,  $\Delta\Delta_{\text{ads}}H = \Delta_{\text{ads}}H_{cp} - \Delta_{\text{ads}}H_{op}$  with the amount of gas adsorbed per unit cell,  $n_{\text{ads}}$ .

$$\Delta\Delta_{\text{ads}}H_{\text{total}} = (\Delta_{\text{ads}}H_{cp} - \Delta_{\text{ads}}H_{op}) \cdot n_{\text{ads}} \quad (4)$$

Estimations of  $\Delta\Delta_{\text{ads}}H_{\text{total}}$  for the series of materials are  $-1177 \text{ kJ mol}^{-1}$  (DUT-48),  $-2289 \text{ kJ mol}^{-1}$  (DUT-46),  $-3491 \text{ kJ mol}^{-1}$  (DUT-49),  $-4458 \text{ kJ mol}^{-1}$  (DUT-50),  $-6290 \text{ kJ mol}^{-1}$  (DUT-151).

Supplementary Table 32. Adsorption enthalpy estimations for *op-cp* transitions derived from the GCMC simulations.

|                                                                                                                 | DUT-48 | DUT-46 | DUT-49 | DUT-50 | DUT-151 |
|-----------------------------------------------------------------------------------------------------------------|--------|--------|--------|--------|---------|
| $p$ at intersection (kPa)                                                                                       | 1.05   | 2.6    | 6.8    | 12.9   | 22.3    |
| $n_{ads} = n_{ads,op} = n_{ads,cp}$ (molecules CH <sub>4</sub> per unit cell)                                   | 318    | 388    | 463    | 596    | 864     |
| $\Delta\Delta_{ads}H = \Delta_{ads}H_{cp} - \Delta_{ads}H_{op}$ (kJ mol <sup>-1</sup> )                         | -3.7   | -5.9   | -7.54  | -7.48  | -7.28   |
| $\Delta\Delta_{ads}H_{total} = (\Delta_{ads}H_{cp} - \Delta_{ads}H_{op}) \cdot n_{ads}$ (kJ mol <sup>-1</sup> ) | -1177  | -2289  | -3491  | -4458  | -6290   |

Equation (4) can be generalized to reflect the adsorptive part of the energetic driving force for the entire pressure range  $n_{ads,op} \neq n_{ads,cp}$ .  $\Delta\Delta_{ads}H_{total}$  is the total difference in adsorption enthalpy for the *op-cp* transition of one unit cell.

$$\Delta\Delta_{ads}H_{total} = \Delta_{ads}H_{cp} \cdot n_{ads,cp} - \Delta_{ads}H_{op} \cdot n_{ads,op} \quad (5)$$

The quantity

$$\Delta\Delta_{ads}H = \Delta_{ads}H_{cp} - \Delta_{ads}H_{op} < 0 \quad (6)$$

is the difference in adsorption enthalpies for the *op* and *cp* phase. Equation (5) can be rearranged to reflect the total adsorptive enthalpy difference with respect to  $\Delta n = n_{op} - n_{cp}$ .

$$\Delta\Delta_{ads}H_{total} = \Delta_{ads}H_{cp} \cdot n_{ads,cp} - \Delta_{ads}H_{op} \cdot (\Delta n + n_{ads,cp}) \quad (7)$$

$$\Delta\Delta_{ads}H_{total} = \Delta\Delta_{ads}H \cdot n_{ads,cp} - \Delta_{ads}H_{op} \cdot \Delta n \quad (8)$$

For the negative gas adsorption transition:  $\Delta n = \Delta n_{NGA}$ . In equation (8)  $\Delta\Delta_{ads}H \cdot n_{ads,cp}$  represents the adsorptive driving force for the contraction and  $\Delta_{ads}H_{op} \cdot \Delta n$  the driving force for the expansion.

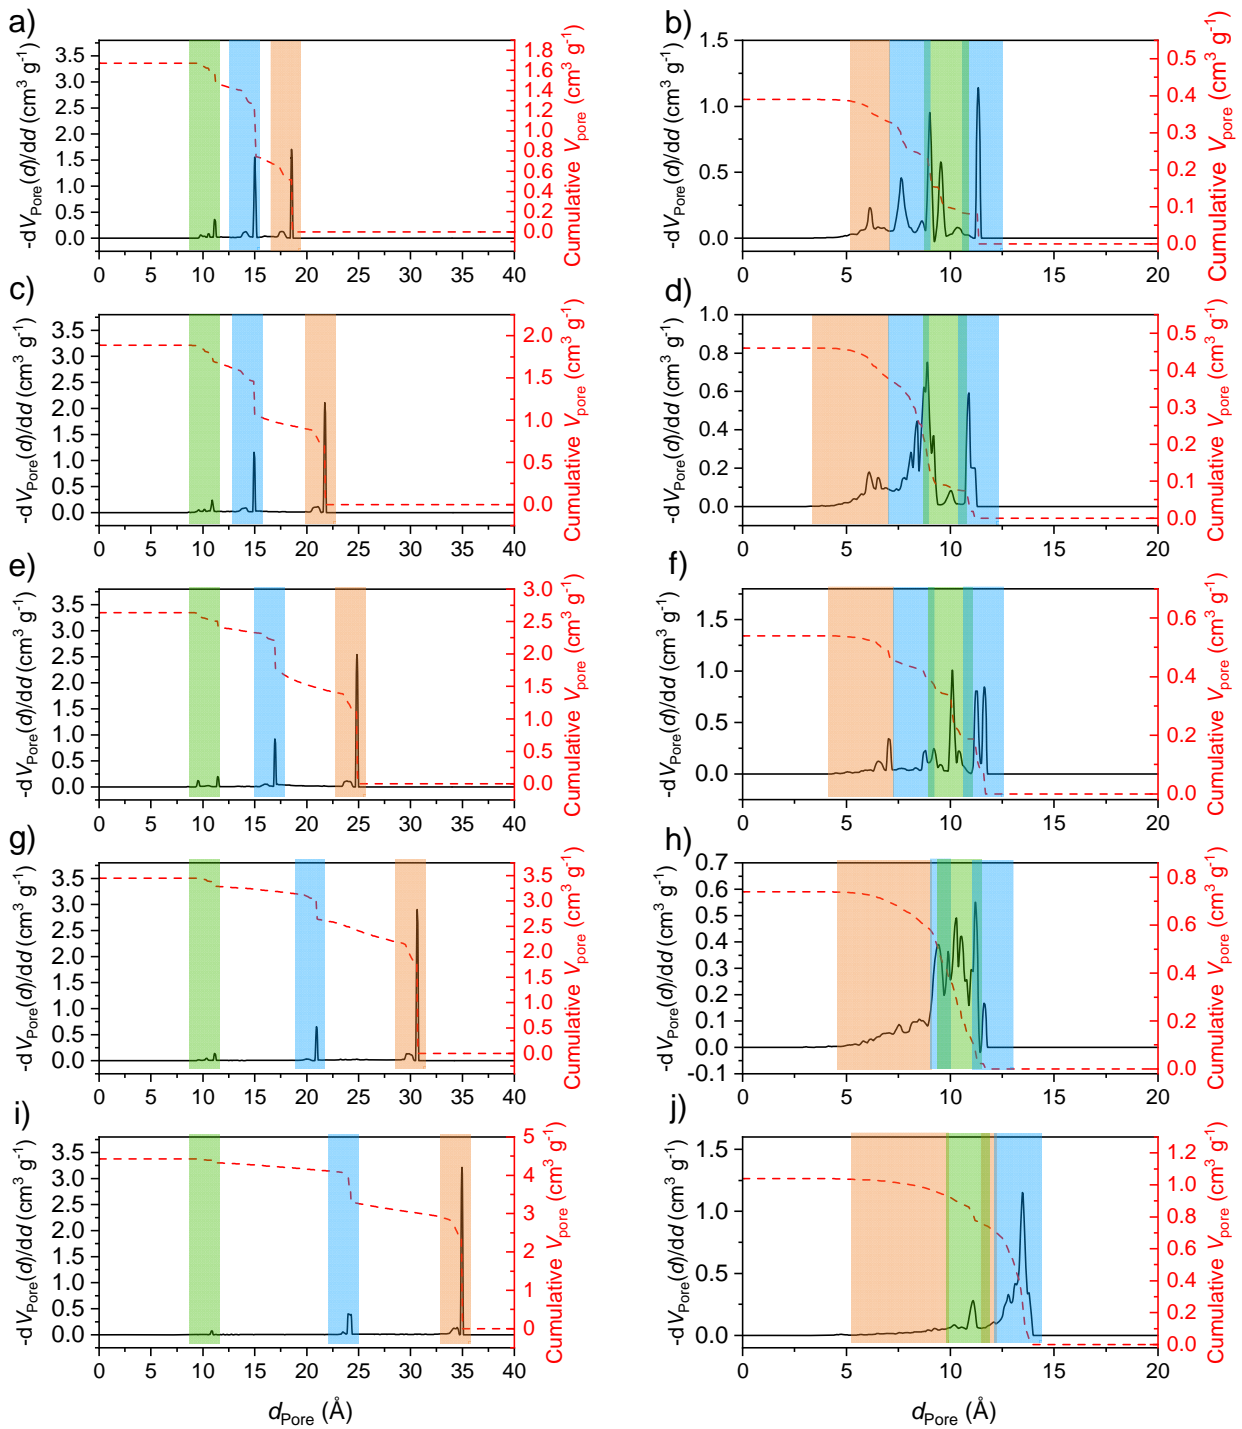

Supplementary Figure 73. Simulated pore size distributions (black lines) and cumulative pore volumes (red dashed lines) of a) DUT-48 $op$ , b) DUT-48 $cp$ , c) DUT-46 $op$ , d) DUT-46 $cp$ , e) DUT-49 $op$ , f) DUT-49 $cp$ , g) DUT-50 $op$ , h) DUT-50 $cp$ , i) DUT-151 $op$ , and j) DUT-151 $cp$ . Colour code trimodal pore system: octahedral (oct, orange), tetrahedral (tet, blue), cuboctahedral (cub, green).



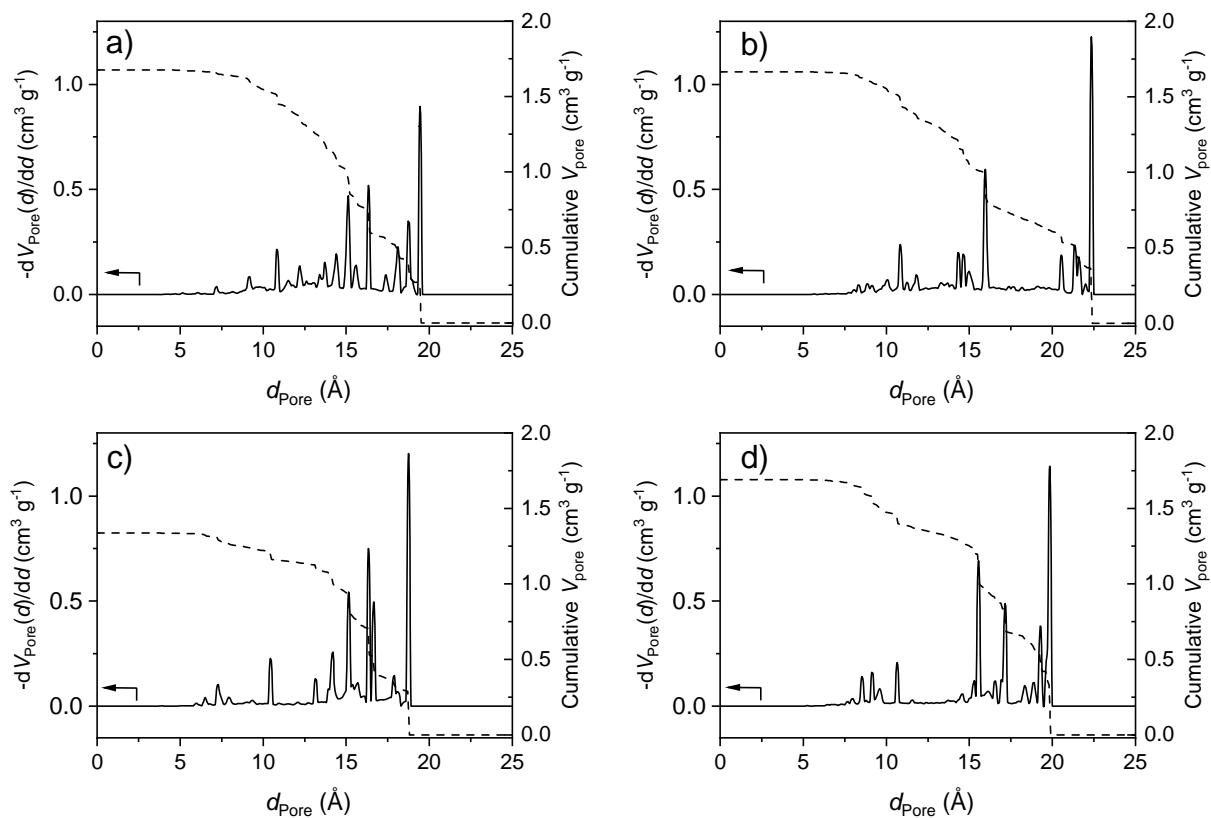

Supplementary Figure 74. Simulated pore size distributions (black lines) and cumulative pore volumes (red dashed lines) of a) DUT-151int, b) DUT-151int-act, c) DUT-151int-cp, and d) DUT-151int-op. Cumulative pore volume is given as dashed black line.

Supplementary Table 33. Pore size distributions and fractional pore volumes extracted from Supplementary Figure 73. Values for the *cp* phases were only partially estimated due to overlapping.

| Material ID | Pore | Open pore                                         |                                    |                                                          | Contracted pore                                   |                                    |                                                          |
|-------------|------|---------------------------------------------------|------------------------------------|----------------------------------------------------------|---------------------------------------------------|------------------------------------|----------------------------------------------------------|
|             |      | $V_{\text{Pore}}$ ( $\text{cm}^3 \text{g}^{-1}$ ) | $d_{\text{Pore}}$ ( $\text{\AA}$ ) | $V_{\text{Pore}}$ fract. ( $\text{cm}^3 \text{g}^{-1}$ ) | $V_{\text{Pore}}$ ( $\text{cm}^3 \text{g}^{-1}$ ) | $d_{\text{Pore}}$ ( $\text{\AA}$ ) | $V_{\text{Pore}}$ fract. ( $\text{cm}^3 \text{g}^{-1}$ ) |
| DUT-48      | Cub  | total                                             | 10.8                               | 0.27                                                     | total                                             | 10.9                               | n. a.                                                    |
|             | Tet  | 1.67                                              | 15                                 | 0.62                                                     |                                                   | n. a.                              | n. a.                                                    |
|             | Oct  |                                                   | 18.5                               | 0.78                                                     |                                                   | 6.1                                | 0.05                                                     |
| DUT-46      | Cub  | total                                             | 10.8                               | 0.19                                                     | total                                             | 10.9                               | n. a.                                                    |
|             | Tet  | 1.89                                              | 14.9                               | 0.74                                                     |                                                   | n. a.                              | n. a.                                                    |
|             | Oct  |                                                   | 21.7                               | 0.96                                                     |                                                   | 6.1-6.5                            | 0.08                                                     |
| DUT-49      | Cub  | total                                             | 10.8                               | 0.23                                                     | total                                             | 10.9                               | n. a.                                                    |
|             | Tet  | 2.64                                              | 16.9                               | 0.87                                                     |                                                   | n. a.                              | n. a.                                                    |
|             | Oct  |                                                   | 24.9                               | 1.54                                                     |                                                   | 6.5-7                              | 0.09                                                     |
| DUT-50      | Cub  | total                                             | 10.8                               | 0.19                                                     | total                                             | 11                                 | n. a.                                                    |
|             | Tet  | 3.45                                              | 21                                 | 0.84                                                     |                                                   | n. a.                              | n. a.                                                    |
|             | Oct  |                                                   | 30.7                               | 2.43                                                     |                                                   | 6.5-8.5                            | 0.13                                                     |
| DUT-151     | Cub  | total                                             | 10.8                               | 0.14                                                     | total                                             | 11.1                               | n. a.                                                    |
|             | Tet  | 4.43                                              | 24                                 | 1.16                                                     |                                                   | n. a.                              | n. a.                                                    |
|             | Oct  |                                                   | 34.9                               | 3.13                                                     |                                                   | 8.7-10.3                           | 0.14                                                     |

### Supplementary Note 12: Adsorbate ( $\text{CH}_4$ ) distribution and radial distribution analysis

Configuration snapshots from GCMC simulations were used to construct methane distribution for each of the three pores present in DUT-48, DUT-49 and DUT-50 at selected loadings (Supplementary Figure 75).

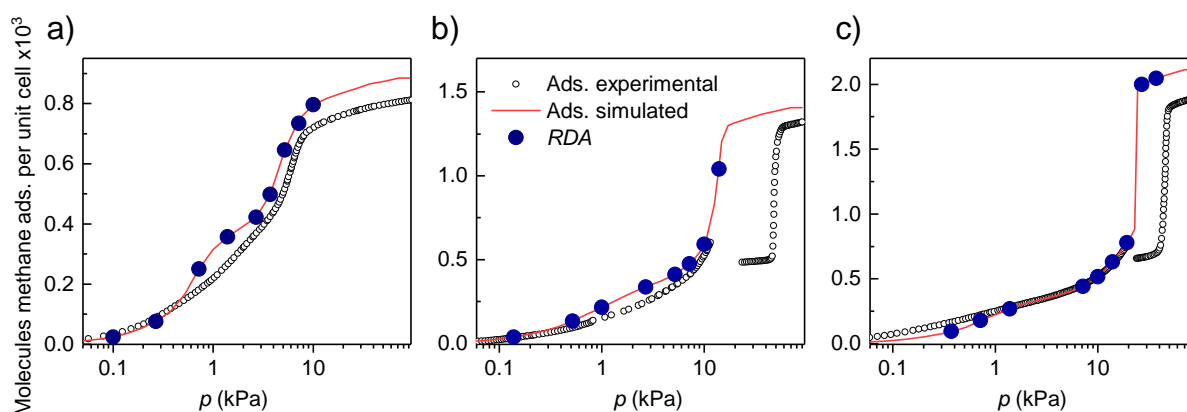

Supplementary Figure 75. Comparison of experimental (open symbols) and simulated (red line) methane adsorption isotherm at 111 K including selected loadings for radial distribution analysis (RDA) of a) DUT-48, b) DUT-49, and c) DUT-50.

Attributing each methane molecule to each of the pores was achieved via a python script using the pymatgen structure object (Supplementary Figure 76).

```

pore_label = []
for index_methane in methane_indices:
    methane_cub_dist = []
    for index_cub in cub_indices:
        methane_cub_dist.append(structure.get_distance(index_cub, index_methane))
    methane_tet_dist = []
    for index_tet in tet_indices:
        methane_tet_dist.append(structure.get_distance(index_tet, index_methane))
    methane_oct_dist = []
    for index_oct in oct_indices:
        methane_oct_dist.append(structure.get_distance(index_oct, index_methane))

    if min(methane_cub_dist) < cub_cut:
        pore_label.append("cub")
        continue
    if min(methane_oct_dist) < oct_cut:
        pore_label.append("oct")
        continue
    if min(methane_tet_dist) < tet_cut:
        pore_label.append("tet")
        continue

amount_cub.append(pore_label.count("cub"))
amount_tet.append(pore_label.count("tet"))
amount_oct.append(pore_label.count("oct"))

```

Supplementary Figure 76. Python script using the pymatgen structure object for radial distribution analysis.

The script uses distance criteria between the adsorbate and the center of each pore to identify which pore the adsorbate is present within. We note that due to the aspherical nature of the pores the distributions are dependent on the sequence of applying the distance criteria. We choose to label in the order: cuboctahedral, octahedral and tetrahedral. This as the tetrahedral pore volume is both part of the cuboctahedral and octahedral pore volume. The key lines of the python code are displayed in Supplementary Figure 76 and a minimal working example is deposited in the supporting information. The amount of methane in each pore was further averaged over 100 snapshots. This was also repeated for structures resulting from the *in situ* CD<sub>4</sub> neutron diffraction experiments. The choice of cut-off for each of the pores was chosen by analysing the radial distribution of the framework atoms from the centre of each of the pores.

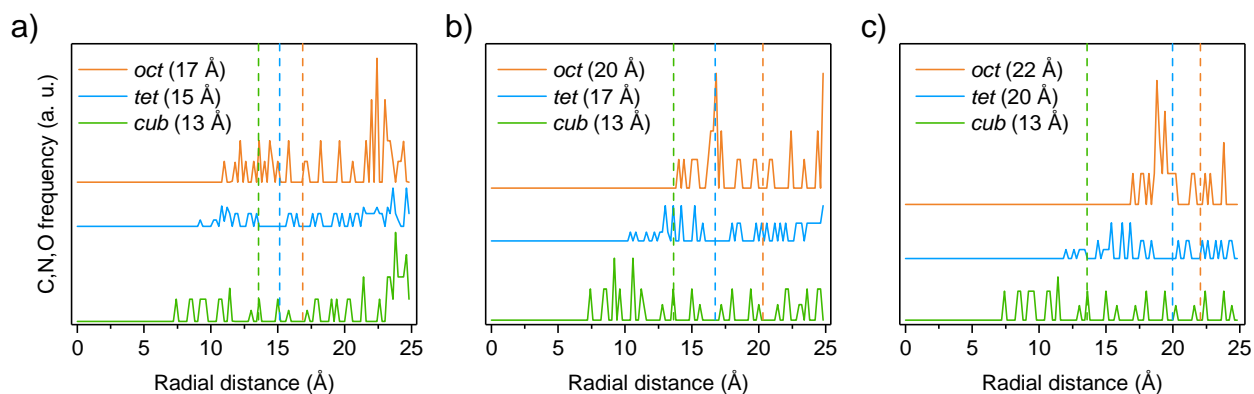

Supplementary Figure 77. Radial distribution of carbon, nitrogen, and oxygen atoms in the guest free framework of a) DUT-48, b) DUT-49, and c) DUT-50. Crystallographic origin of the octahedral pore (0.5,0.5,0.5), tetrahedral pore (0.25,0.25,0.25), and cuboctahedral pore (0,0,0). Dashed lines indicate cut off radius for the radial distribution analysis of methane filled MOFs.

Values of the chosen cut offs are displayed in Supplementary Figure 77 and summarized in Supplementary Table 34.

Supplementary Table 34. Cut-off radii for radial distribution analysis.

| Material ID | Cub (Å) | Tet (Å) | Oct (Å) |
|-------------|---------|---------|---------|
| DUT-48      | 10.6    | 12.4    | 14.4    |
| DUT-49      | 10.6    | 14.6    | 17.2    |
| DUT-50      | 10.6    | 17.4    | 19.8    |

To visualise the distribution of the adsorbates within each of the pores, the radial distribution relative to the pore was computed. This is similar to computing a radial distribution function but is not normalised to the radial volume as it is calculated from centre of the pore and at higher loadings the center point can contain a significant density of gas. The radial frequency of adsorbates and C, N, O atoms of the framework for each of the pores in DUT-48, DUT-49 and DUT-50 for increasing loading are displayed in Supplementary Figure 77 and Supplementary Figure 78. Furthermore, we report a comparison of the experimental and simulated distributions in Figure 79-81.

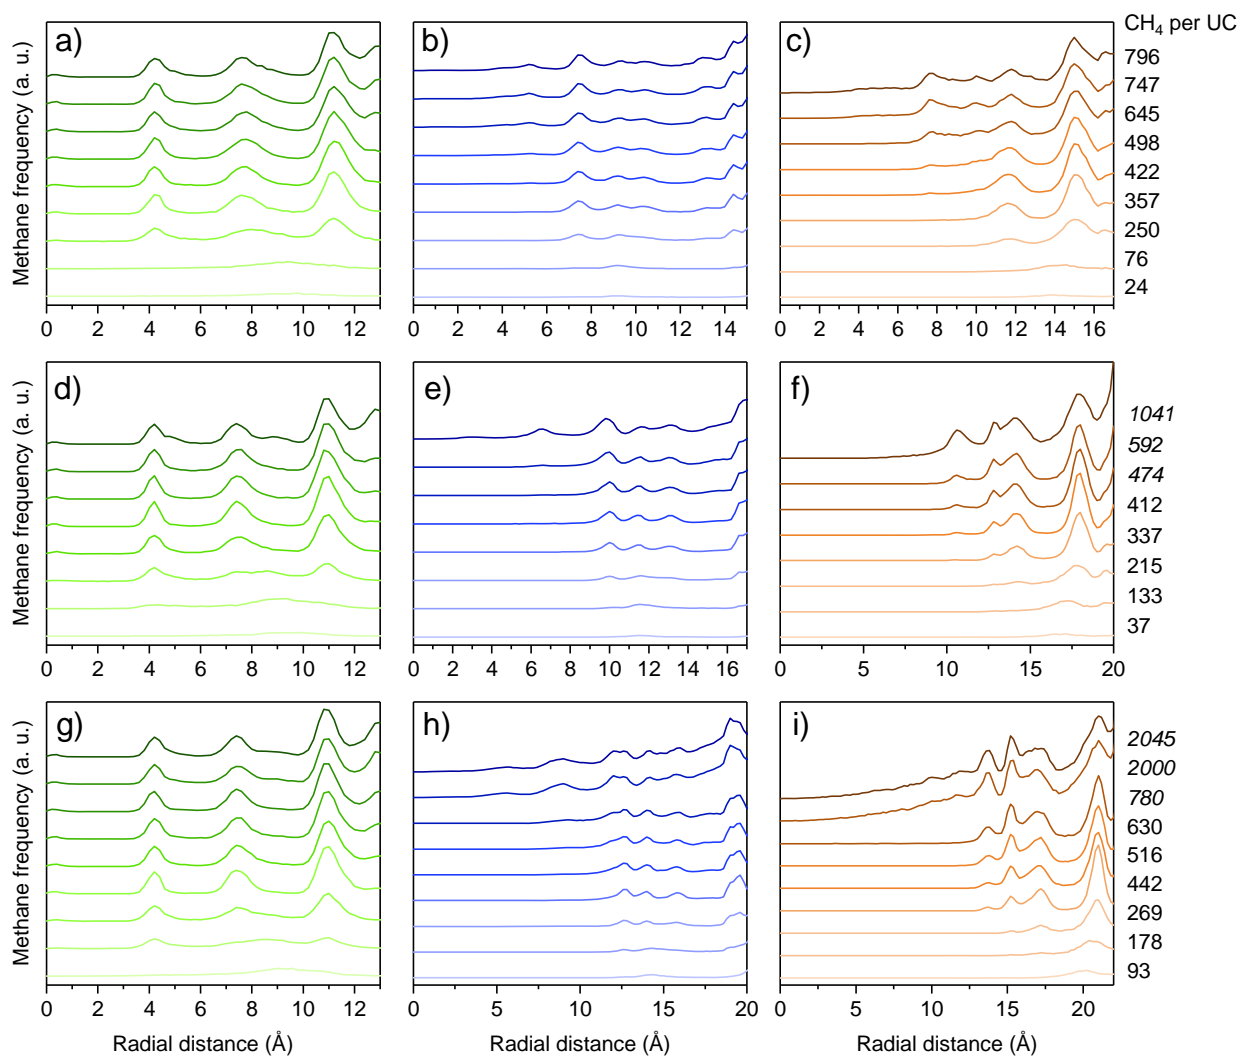

Supplementary Figure 78. Radial distribution of methane in the pores of a-c) DUT-48, d-f) DUT-49, and g-i) DUT-50. Crystallographic origin of the octahedral pore (orange, c,f,i) (0.5,0.5,0.5), tetrahedral pore (blue, b,e,h) (0.25,0.25,0.25), and cuboctahedral pore (green, a,d,g) (0,0,0). Loadings of the corresponding distribution curves are indicated at the right.

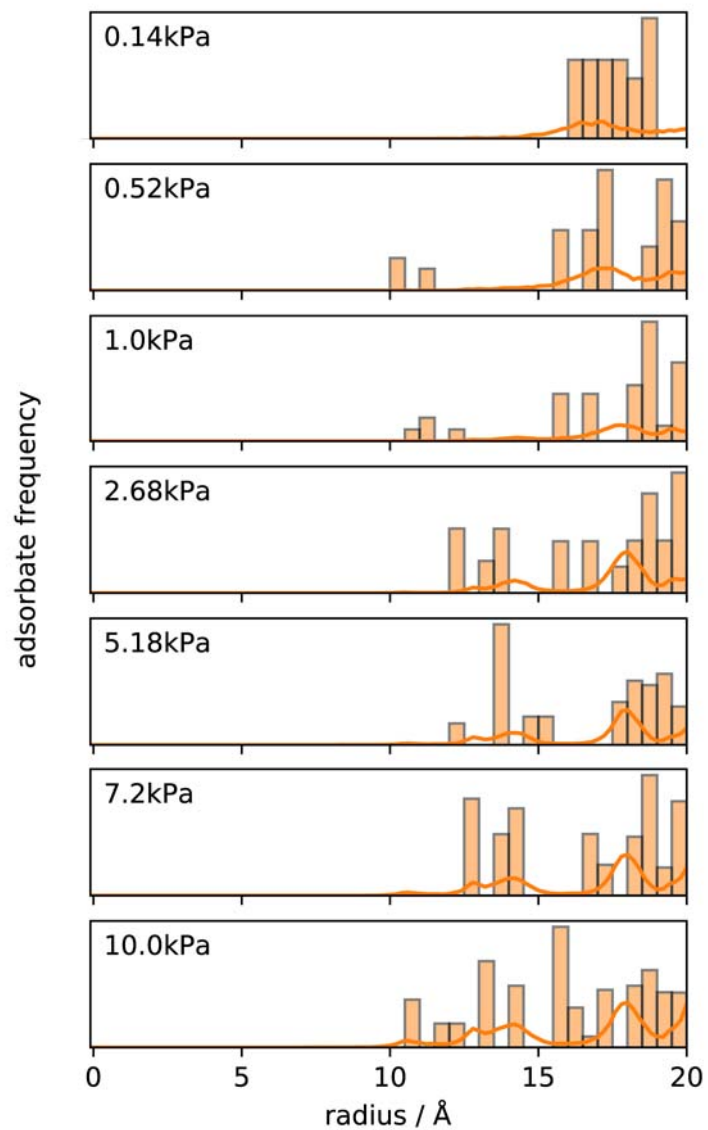

Supplementary Figure 79. Comparison of the simulated and experimental radial distributions of methane in the octahedral pore of DUT-49 for increasing loading. Simulated distributions are depicted as lines and experimental positions displayed as histograms.

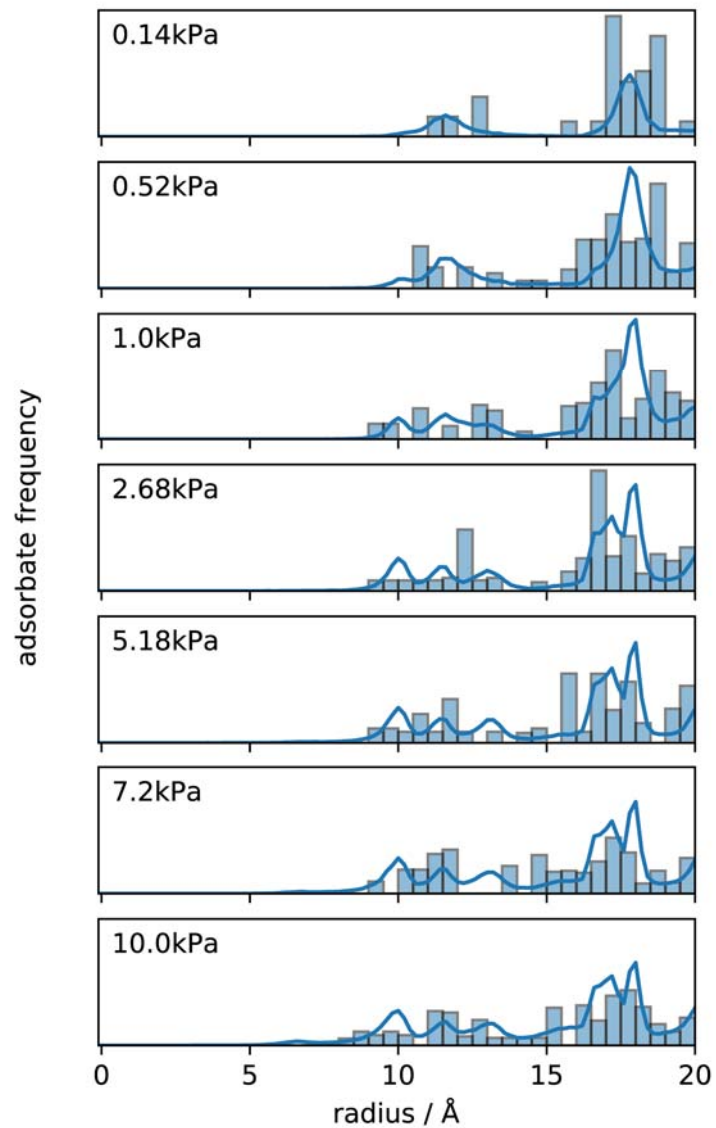

Supplementary Figure 80. Comparison of the simulated and experimental radial distributions of methane in the tetrahedral pore of DUT-49 for increasing loading. Simulated distributions are depicted as lines and experimental positions displayed as histograms.

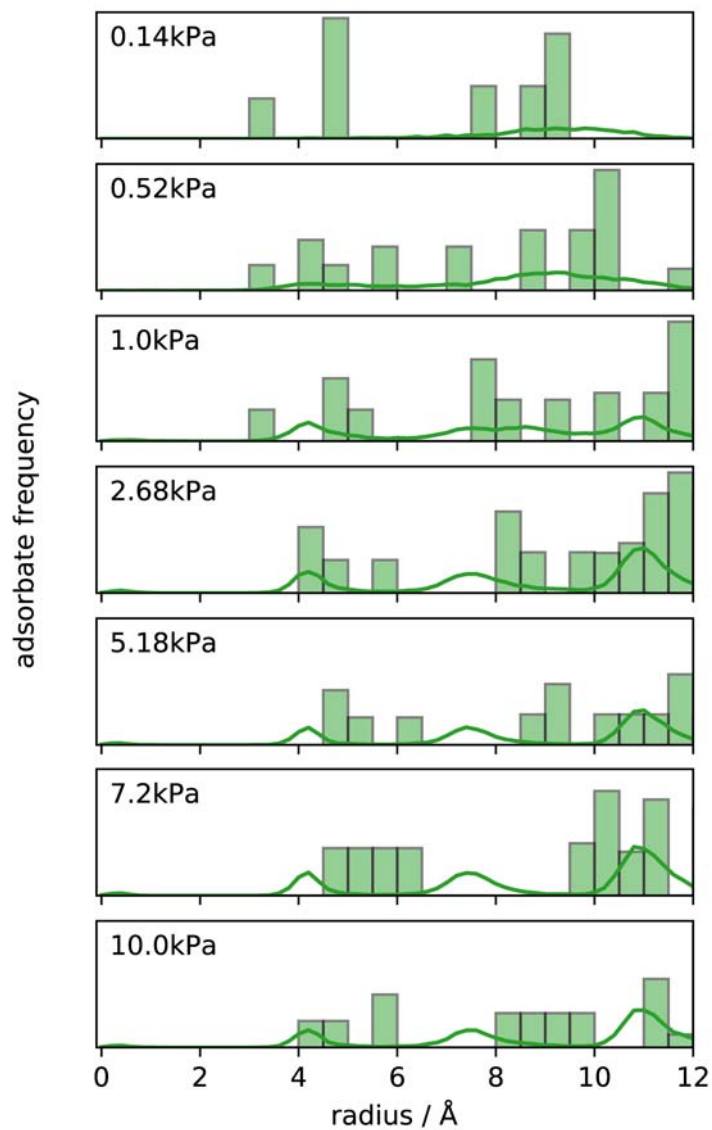

Supplementary Figure 81. Comparison of the simulated and experimental radial distributions of methane in the cuboctahedral pore of DUT-49 for increasing loading. Simulated distributions are depicted as lines and experimental positions displayed as histograms.



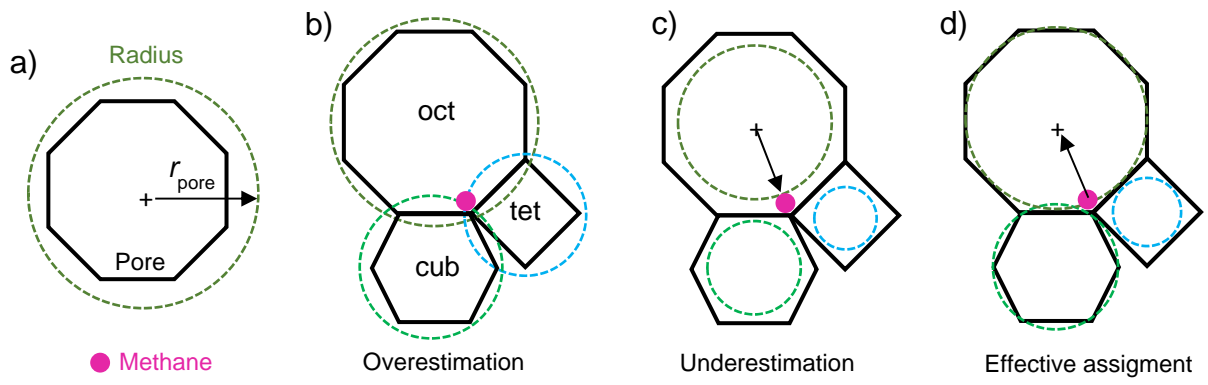

Supplementary Figure 82. Scheme of radial distribution analysis in a trimodal pore structure similar to DUT-49.

## Supplementary References

- 1 Schindelin, J. *et al.* Fiji: an open-source platform for biological-image analysis. *Nat. Methods* **9**, 676-682, doi:10.1038/nmeth.2019 (2012).
- 2 Krause, S. *et al.* Adsorption Contraction Mechanics: Understanding Breathing Energetics in Isorecticular Metal–Organic Frameworks. *J. Phys. Chem. C* **122**, 19171-19179, doi:10.1021/acs.jpcc.8b04549 (2018).
- 3 Rowland, C. A. *et al.* Methane Storage in Paddlewheel-Based Porous Coordination Cages. *J. Am. Chem. Soc.* **140**, 11153-11157, doi:10.1021/jacs.8b05780 (2018).
- 4 Lu, W. *et al.* Highly porous metal-organic framework sustained with 12-connected nanoscopic octahedra. *Dalton Trans.* **42**, 1708-1714, doi:10.1039/C2DT32479B (2013).
- 5 Weseliński, Ł. J., Luebke, R. & Eddaoudi, M. A Convenient Preparation of 9H-Carbazole-3,6-dicarbonitrile and 9H-Carbazole-3,6-dicarboxylic Acid. *Synthesis* **46**, 596-599, doi:10.1055/s-0033-1340557 (2014).
- 6 Stoeck, U., Senkovska, I., Bon, V., Krause, S. & Kaskel, S. Assembly of metal-organic polyhedra into highly porous frameworks for ethene delivery. *Chem. Commun.* **51**, 1046-1049, doi:10.1039/C4CC07920E (2015).
- 7 Krause, S. *et al.* The effect of crystallite size on pressure amplification in switchable porous solids. *Nat. Commun.* **9**, 1573, doi:10.1038/s41467-018-03979-2 (2018).
- 8 Krause, S. *et al.* A pressure-amplifying framework material with negative gas adsorption transitions. *Nature* **532**, 348-352, doi:10.1038/nature17430 (2016).
- 9 Helmholtz-Zentrum Berlin für Materialien und Energie. The MX beamlines BL14.1-3 at BESSY II. *JLSRF* **2**, 1-6, doi:10.17815/jlsrf-2-64 (2016).
- 10 Battye, T. G. G., Kontogiannis, L., Johnson, O., Powell, H. R. & Leslie, A. G. W. iMOSFLM: a new graphical interface for diffraction-image processing with MOSFLM. *Acta Crystallogr. D* **67**, 271-281, doi:10.1107/S0907444910048675 (2011).
- 11 Winn, M. D. *et al.* Overview of the CCP4 suite and current developments. *Acta Crystallogr. D* **67**, 235-242, doi:10.1107/S0907444910045749 (2011).
- 12 Sparta, K. M., Krug, M., Heinemann, U., Mueller, U. & Weiss, M. S. XDSAPP2.0. *J. Appl. Crystallogr.* **49**, 1085-1092, doi:10.1107/S1600576716004416 (2016).
- 13 Sheldrick, G. A short history of SHELX. *Acta Crystallogr. A* **64**, 112-122, doi:10.1107/S0108767307043930 (2008).
- 14 Sheldrick, G. Crystal structure refinement with SHELXL. *Acta Crystallogr. C* **71**, 3-8, doi:10.1107/S2053229614024218 (2015).
- 15 Spek, A. Structure validation in chemical crystallography. *Acta Crystallogr. D* **65**, 148-155, doi:10.1107/S090744490804362X (2009).
- 16 Willems, T. F., Rycroft, C. H., Kazi, M., Meza, J. C. & Haranczyk, M. Algorithms and tools for high-throughput geometry-based analysis of crystalline porous materials. *Microporous Mesoporous Mater.* **149**, 134-141, doi:10.1016/j.micromeso.2011.08.020 (2012).
- 17 Gómez-Gualdrón, D. A., Moghadam, P. Z., Hupp, J. T., Farha, O. K. & Snurr, R. Q. Application of Consistency Criteria To Calculate BET Areas of Micro- And Mesoporous Metal–Organic Frameworks. *J. Am. Chem. Soc.* **138**, 215-224, doi:10.1021/jacs.5b10266 (2016).

- 18 Farha, O. K. *et al.* Metal–Organic Framework Materials with Ultrahigh Surface Areas: Is the Sky the Limit? *J. Am. Chem. Soc.* **134**, 15016-15021, doi:10.1021/ja3055639 (2012).
- 19 Llewellyn, P. L. & Maurin, G. Gas adsorption microcalorimetry and modelling to characterise zeolites and related materials. *C. R. Chim.* **8**, 283-302, doi:10.1016/j.crci.2004.11.004 (2004).
- 20 NIST REFPROP (National Institute of Standards and Technology, 2018).
- 21 Beurroies, I. *et al.* Using Pressure to Provoke the Structural Transition of Metal–Organic Frameworks. *Angew. Chem. Int. Ed.* **49**, 7526-7529, doi:10.1002/anie.201003048 (2010).
- 22 Ramaswamy, P. *et al.* Mechanical properties of a gallium fumarate metal-organic framework: a joint experimental-modelling exploration. *J. Mater. Chem. A* **5**, 11047-11054, doi:10.1039/C7TA01559C (2017).
- 23 Yot, P. G. *et al.* Metal-organic frameworks as potential shock absorbers: the case of the highly flexible MIL-53(Al). *Chem. Commun.* **50**, 9462-9464, doi:10.1039/C4CC03853C (2014).
- 24 Yot, P. G. *et al.* Exploration of the mechanical behavior of metal organic frameworks UiO-66(Zr) and MIL-125(Ti) and their NH<sub>2</sub> functionalized versions. *Dalton Trans.* **45**, 4283-4288, doi:10.1039/c5dt03621f (2016).
- 25 Yot, P. G. *et al.* Impact of the Metal Centre and Functionalization on the Mechanical Behaviour of MIL-53 Metal–Organic Frameworks. *Eur. J. Inorg. Chem.* **2016**, 4424-4429, doi:10.1002/ejic.201600263 (2016).
- 26 Henke, S. *et al.* Pore closure in zeolitic imidazolate frameworks under mechanical pressure. *Chem. Sci.*, doi:10.1039/C7SC04952H (2018).
- 27 Helmholtz-Zentrum Berlin für Materialien und Energie. KMC-2: an X-ray beamline with dedicated diffraction and XAS endstations at BESSY II. *JLSRF* **2**, A49, doi:10.17815/jlsrf-2-65 (2016).
- 28 Bon, V. *et al.* In situ monitoring of structural changes during the adsorption on flexible porous coordination polymers by X-ray powder diffraction: Instrumentation and experimental results. *Microporous Mesoporous Mater.* **188**, 190-195, doi:10.1016/j.micromeso.2013.12.024 (2014).
- 29 Datasqueeze 2.2.9 Graphical Tool for X-ray Data Analysis v. 2.2.9 (2012).
- 30 Wojdyr, M. Fityk: a general-purpose peak fitting program. *J. Appl. Crystallogr.* **43**, 1126-1128, doi:10.1107/S0021889810030499 (2010).
- 31 Bail, A. L. Whole powder pattern decomposition methods and applications: A retrospection. *Powder Diffr.* **4**, 316-326, doi:10.1154/1.2135315 (2005).
- 32 FULLPROF (Laboratoire Le'on Brillouin (CEA–CNRS), France, 2006).
- 33 Material Studio 5.0 (Accelrys Software Inc., San Diego, USA, 2009).
- 34 Helmholtz-Zentrum Berlin für Materialien und Energie. E9: The Fine Resolution Powder Diffractometer (FIREPOD) at BER II. *JLSRF* **3**, A103, doi:10.17815/jlsrf-3-127 (2017).
- 35 Roisnel, T. & Rodríguez-Carvajal, J. WinPLOTR: A Windows Tool for Powder Diffraction Pattern Analysis. *Mater. Sci. Forum* **378-381**, 118-123, doi:10.4028/[www.scientific.net/MSF.378-381.118](http://www.scientific.net/MSF.378-381.118) (2001).
- 36 Getzschmann, J. *et al.* Methane storage mechanism in the metal-organic framework Cu<sub>3</sub>(btc)<sub>2</sub>: An in situ neutron diffraction study. *Microporous Mesoporous Mater.* **136**, 50-58, doi:10.1016/j.micromeso.2010.07.020 (2010).
- 37 Wu, H. *et al.* Metal-Organic Frameworks with Exceptionally High Methane Uptake: Where and How is Methane Stored? *Chem. Eur. J.* **16**, 5205-5214, doi:10.1002/chem.200902719 (2010).

- 38 Wu, H., Zhou, W. & Yildirim, T. Methane Sorption in Nanoporous Metal–Organic Frameworks and First-Order Phase Transition of Confined Methane. *J. Phys. Chem. C* **113**, 3029-3035, doi:10.1021/jp8103276 (2009).
- 39 Bogdan, K., Ege, D., Filip, F., L., L. P. & Lucyna, F. Adsorption-Induced Structural Phase Transformation in Nanopores. *Angew. Chem. Int. Ed.* **56**, 16243-16246, doi:10.1002/anie.201708993 (2017).
- 40 Carrington, E. J., Vitorica-Yrezabal, I. J. & Brammer, L. Crystallographic studies of gas sorption in metal-organic frameworks. *Acta Crystallogr. B* **70**, 404-422, doi:10.1107/S2052520614009834 (2014).
- 41 Glaser, T. *et al.* Infrared study of the MoO<sub>3</sub> doping efficiency in 4,4'-bis(N-carbazolyl)-1,1'-biphenyl (CBP). *Org. Electron.* **14**, 575-583, doi:10.1016/j.orgel.2012.11.031 (2013).
- 42 Stoeck, U., Krause, S., Bon, V., Senkovska, I. & Kaskel, S. A highly porous metal-organic framework, constructed from a cuboctahedral super-molecular building block, with exceptionally high methane uptake. *Chem. Commun.* **48**, 10841-10843, doi:10.1039/C2CC34840C (2012).
- 43 Bureekaew, S. *et al.* MOF-FF – A flexible first-principles derived force field for metal-organic frameworks. *Phys. Status Solidi B* **250**, 1128-1141, doi:10.1002/pssb.201248460 (2013).
