# Supplementary material for: Towards general network architecture design criteria for negative gas adsorption transitions in ultraporous frameworks
Source: PubMed Central journal article supplement (PMC6690989; doi:10.1038/s41467-019-11565-3), 2019-08-12
Supplement: 41467_2019_11565_MOESM2_ESM.pdf [file 41467_2019_11565_MOESM2_ESM.pdf]

## **Description of Additional Supplementary Files**

File Name: Supplementary Data 1

Description: Simulated structures of op and cp phases of DUT-48, -46, -49, -50, and -151.

File Name: Supplementary Data 2

Description: Rietveld-refined structures of CD4-filled DUT-48, -49, and -50.

File Name: Supplementary Movie 1

Description: Cartoon of the pore filling mechanism upon methane adsorption in DUT-49op at 111 K.
